# Supplementary material
Source: publisher site journal article supplement (https://www.dovepress.com/article/398862)
Supplement: Supplementary file 1 [file get_supplementary_file.php]

**Supplementary Table 1** Immune related gens(IRGs) from the MsigDB (<https://www.gsea-msigdb.org/gsea/msigdb>).

| Gene sets<br>name                           | Gene                                                                                                                                                                                                                                                                                                                                                                                                                                                                                                                                                                                                                                                                                                                                                                                                                                                                                                                                                                                                                                                                                                                                                                                                                                                                                                                                                                                                                                                                                                                                                                                                                                                                                                                                                                                                                                                                                                                                                                                                                                                                                                                                                                                                                                                                                                                                                                                                                                                                                                                                                                                                                                                                                                                                                                                                                                                                                                                                                           |
|---------------------------------------------|----------------------------------------------------------------------------------------------------------------------------------------------------------------------------------------------------------------------------------------------------------------------------------------------------------------------------------------------------------------------------------------------------------------------------------------------------------------------------------------------------------------------------------------------------------------------------------------------------------------------------------------------------------------------------------------------------------------------------------------------------------------------------------------------------------------------------------------------------------------------------------------------------------------------------------------------------------------------------------------------------------------------------------------------------------------------------------------------------------------------------------------------------------------------------------------------------------------------------------------------------------------------------------------------------------------------------------------------------------------------------------------------------------------------------------------------------------------------------------------------------------------------------------------------------------------------------------------------------------------------------------------------------------------------------------------------------------------------------------------------------------------------------------------------------------------------------------------------------------------------------------------------------------------------------------------------------------------------------------------------------------------------------------------------------------------------------------------------------------------------------------------------------------------------------------------------------------------------------------------------------------------------------------------------------------------------------------------------------------------------------------------------------------------------------------------------------------------------------------------------------------------------------------------------------------------------------------------------------------------------------------------------------------------------------------------------------------------------------------------------------------------------------------------------------------------------------------------------------------------------------------------------------------------------------------------------------------------|
| GOBP<br>REGULATION<br>OF IMMUNE<br>RESPONSE | <p>A2M, ABL1, ACOD1, ADA, ADAM8, ADAR, ADCY7, ADGRE2, ADORA2B, AGER, AHR, AIM2, AKIRIN2, ALOX15, ALPK1, AMBP, ANKRD17, ANXA1, AP1G1, AP3B1, APCS, APLF, APOE, APPL1, APPL2, ARG1, ARG2, ARID5A, ARRB2, ATAD5, AZGP1, B2M, BAG6, BANF1, BANK1, BAX, BCAR1, BCL10, BCL2, BCL6, BCR, BIRC2, BIRC3, BLK, BLNK, BMX, BPIFB1, BTK, BTLA, BTN1A1, BTN2A1, BTN2A2, BTN2A3P, BTN3A1, BTN3A2, BTN3A3, BTNL10, BTNL2, BTNL3, BTNL8, BTNL9, C12orf4, C17orf99, C1QA, C1QB, C1QBP, C1QC, C1R, C1RL, C1S, C2, C3, C3AR1, C4A, C4B, C4BPA, C4BPB, C5, C5AR1, C5AR2, C6, C7, C8A, C8B, C8G, C9, CACNB3, CACTIN, CADM1, CARD11, CARD9, CASP6, CASP8, CAV1, CBLB, CCL19, CCL5, CCR2, CCR7, CD14, CD160, CD177, CD19, CD1A, CD1B, CD1C, CD1D, CD1E, CD200, CD200R1, CD22, CD226, CD24, CD247, CD274, CD276, CD28, CD300A, CD300LF, CD33, CD36, CD38, CD4, CD40, CD46, CD47, CD48, CD55, CD59, CD5L, CD74, CD79A, CD79B, CD80, CD81, CD84, CD86, CD8A, CD8B, CD8B2, CD96, CDC37, CEACAM1, CFB, CFD, CFH, CFHR1, CFHR5, CFI, CFP, CGAS, CLC, CLCF1, CLEC12B, CLEC4D, CLEC4E, CLEC4G, CLEC6A, CLEC7A, CLNK, CLPB, CLU, CMKLR1, CMTM3, CNOT7, CNR1, COCH, COL3A1, COLEC10, COLEC11, COLEC12, CR1, CR1L, CR2, CREBBP, CRK, CRKL, CRP, CRTAM, CSK, CTLA4, CTSG, CTSH, CTSS, CXCL13, CYBA, CYLD, CYRIB, DAB2IP, DCST1, DDX3X, DDX58, DDX60, DENND1B, DGKZ, DHX58, DHX9, DNASE2, DRD2, DUSP10, DUSP22, DUSP3, ECM1, EIF2AK4, EIF2B1, EIF2B2, EIF2B3, EIF2B4, EIF2B5, ELANE, ELF1, ENPP3, ENTPD7, EP300, EPG5, EPHB2, ERAP1, ERBIN, EREG, ERMAP, ESR1, EXOSC3, EXOSC6, EZR, F2RL1, FADD, FAM3A, FBXO38, FCER1A, FCER1G, FCER2, FCGR1A, FCGR1B, FCGR2A, FCGR2B, FCGR2C, FCGR3A, FCGR3B, FCHO1, FCN1, FCN2, FCN3, FCRL3, FCRLB, FER, FES, FFAR2, FGL1, FGL2, FGR, FKBP1A, FLOT1, FLOT2, FOXF1, FOXFJ1, FOXP1, FOXP3, FPR1, FPR2, FPR3, FURIN, FUT7, FYB1, FYB2, FYN, FZD5, GAB2, GATA1, GATA2, GATA3, GATA6, GBP1, GBP5, GCSAM, GCSAML, GFER, GFI1, GPATCH3, GPLD1, GPR108, GPR151, GPR31, GPR32, GPR32P1, GPR33, GPS2, GPX1, GRAMD4, GRN, HAVCR2, HCK, HCST, HEXIM1, HFE, HHLA2, HLA-A, HLA-B, HLA-DMB, HLA-DPB1, HLA-DQB1, HLA-DRA, HLA-DRB1, HLA-DRB3, HLA-E, HLA-F, HLA-G, HLA-H, HLX, HMCES, HMGB1, HMGB2, HMOX1, HMSD, HPX, HRAS, HRG, HSP90AA1, HSP90AB1, HSPA1A, HSPA1B, HSPD1, ICOSLG, IDO1, IFI16, IFI35, IFIH1, IFNA2, IFNB1, IFNG, IFNK, IFNL1, IFNL2, IFNL3, IFNL4, IGHA1, IGHA2, IGHD, IGHE, IGHG1, IGHG2, IGHG3, IGHG4, IGHM, IGHV1-18, IGHV1-24, IGHV1-3, IGHV1-45, IGHV1-58, IGHV1-69, IGHV1-69-2, IGHV1-69D, IGHV1OR15-1, IGHV2-26, IGHV2-5, IGHV2-70, IGHV2-70D, IGHV3-11, IGHV3-13, IGHV3-15, IGHV3-16, IGHV3-20, IGHV3-21, IGHV3-23, IGHV3-30, IGHV3-33, IGHV3-35, IGHV3-38, IGHV3-43, IGHV3-48, IGHV3-49, IGHV3-53, IGHV3-64, IGHV3-64D, IGHV3-66, IGHV3-7, IGHV3-72, IGHV3-73, IGHV3-74, IGHV4-28, IGHV4-31, IGHV4-34, IGHV4-39, IGHV4-4, IGHV4-59, IGHV4-61, IGHV5-10-1, IGHV5-51, IGHV6-1, IGHV7-4-1, IGHV7-81, IGKC, IGLC1, IGLC2, IGLC3, IGLC6, IGLC7, IGLL1,</p> |

| Gene sets name | Gene                                                                                                                                                                                                                                                                                                                                                                                                                                                                                                                                                                                                                                                                                                                                                                                                                                                                                                                                                                                                                                                                                                                                                                                                                                                                                                                                                                                                                                                                                                                                                                                                                                                                                                                                                                                                                                                                                                                                                                                                                                                                                                                                                                                                                                                                                                                                                                                                                                                                                                                                                                                                                                                                                                                                                                                                                                                                                                                                                                                                                                         |
|----------------|----------------------------------------------------------------------------------------------------------------------------------------------------------------------------------------------------------------------------------------------------------------------------------------------------------------------------------------------------------------------------------------------------------------------------------------------------------------------------------------------------------------------------------------------------------------------------------------------------------------------------------------------------------------------------------------------------------------------------------------------------------------------------------------------------------------------------------------------------------------------------------------------------------------------------------------------------------------------------------------------------------------------------------------------------------------------------------------------------------------------------------------------------------------------------------------------------------------------------------------------------------------------------------------------------------------------------------------------------------------------------------------------------------------------------------------------------------------------------------------------------------------------------------------------------------------------------------------------------------------------------------------------------------------------------------------------------------------------------------------------------------------------------------------------------------------------------------------------------------------------------------------------------------------------------------------------------------------------------------------------------------------------------------------------------------------------------------------------------------------------------------------------------------------------------------------------------------------------------------------------------------------------------------------------------------------------------------------------------------------------------------------------------------------------------------------------------------------------------------------------------------------------------------------------------------------------------------------------------------------------------------------------------------------------------------------------------------------------------------------------------------------------------------------------------------------------------------------------------------------------------------------------------------------------------------------------------------------------------------------------------------------------------------------------|
|                | IGLL5, IKBKB, IKBKE, IKBKG, IL10, IL12A, IL12B, IL12RB1, IL13, IL13RA2, IL15, IL17A, IL17F, IL18, IL18R1, IL1B, IL1R1, IL1RL1, IL2, IL20RB, IL21, IL23A, IL23R, IL27, IL27RA, IL4, IL4I1, IL4R, IL6, IL6ST, IL7R, INAVA, INPP5D, INS, IRAK1, IRAK2, IRAK3, IRAK4, IRF1, IRF3, IRF4, IRF7, IRGM, ISG15, ITCH, ITGAM, ITGB2, ITK, JAK3, KARS1, KCNN4, KHDRBS1, KIR2DL1, KIR2DL4, KIR2DS2, KIT, KLHL6, KLK3, KLK5, KLK7, KLRC1, KLRC2, KLRC3, KLRC4, KLRC4-KLRK1, KLRD1, KLRK1, KMT5B, KMT5C, KRT1, LACC1, LAG3, LAMP1, LAPTM5, LAT2, LAX1, LBP, LCK, LCP2, LEP, LGALS3, LGALS9, LGR4, LILRA2, LILRA4, LILRB1, LILRB2, LILRB4, LIME1, LIMK1, LOXL3, LPXN, LRP8, LRRC14, LRRC19, LSM14A, LTA, LTF, LY96, LYAR, LYN, MAD2L2, MALT1, MAP2K4, MAP2K6, MAP2K7, MAP3K1, MAP3K7, MAPK1, MAPK10, MAPK14, MAPK8, MAPK9, MAPKAP2, MAPKAP3, MASP1, MASP2, MATR3, MAVS, MBL2, MED1, MEF2C, METTL3, MFAP4, MFHAS1, MICA, MICB, MIR105-1, MIR136, MIR140, MIR146A, MIR17, MIR181B1, MIR18A, MIR19A, MIR19B1, MIR21, MIR34A, MIR520B, MIR520E, MIR6869, MIR708, MKRN2, MLH1, MMP12, MNDA, MOG, MR1, MS4A1, MS4A2, MSH2, MUL1, MYB, MYD88, MYO1G, N4BP1, NCF1, NCKAP1L, NCR1, NCR3, NCR3LG1, NDFIP1, NECTIN2, NFAM1, NFATC2, NFE2L2, NFKBIA, NFKBID, NFKBIL1, NFKBIZ, NINJ1, NLRC3, NLRC4, NLRC5, NLRP10, NLRP2B, NLRP3, NLRP6, NLRX1, NMI, NOD1, NOD2, NONO, NOP53, NPLOC4, NPY, NPY5R, NR1D1, NR1H2, NR1H3, NR1H4, NR4A3, NSD2, OAS1, OAS3, OASL, OTOP1, OTUD4, OTULIN, P2RX7, PAK1, PAK2, PAK3, PARK7, PARP14, PARP3, PARP9, PAWR, PAXIP1, PCK1, PDCD1, PDE4B, PDE4D, PDPK1, PELI1, PGC, PGLYRP1, PGLYRP2, PHB, PHB2, PHPT1, PIANP, PIGR, PIK3AP1, PIK3CA, PIK3CD, PIK3R6, PJA2, PKN1, PLA2G1B, PLA2G2D, PLA2G3, PLA2G4A, PLA2G5, PLA2G6, PLCG1, PLCG2, PLCL2, PLD2, PLEKHA1, PLK2, PLPP4, PLSCR1, POLR3B, POLR3C, POLR3D, POLR3F, POLR3G, PPARG, PPP2R3C, PPP3CB, PQBP1, PRAM1, PRKCB, PRKCD, PRKCE, PRKCH, PRKCQ, PRKCZ, PRKD2, PRKDC, PRNP, PSEN1, PSG9, PSMA1, PSMB4, PSPC1, PTAFR, PTK2, PTPN1, PTPN11, PTPN2, PTPN22, PTPN6, PTPRC, PTPRD, PTPRJ, PTPRS, PUM1, PUM2, PVR, PVRIG, PYCARD, PYHIN1, RAB11FIP2, RAB29, RAB7B, RABGEF1, RAC2, RAET1E, RAET1G, RARA, RASGRP1, RBCK1, RBM14, RC3H1, RC3H2, REG3G, RELA, RFTN1, RGCC, RHBDF2, RIF1, RIOK3, RIPK2, RIPK3, RNF125, RNF135, RNF185, RNF31, RPS19, RPS3, RPS6KA3, RSAD2, RTN4, S100A14, SAMHD1, SAMSN1, SARM1, SASH3, SCARA3, SCIMP, SEC14L1, SELENOS, SERPINB4, SERPINB9, SERPING1, SFPQ, SH2B2, SH2D1A, SH2D1B, SHLD1, SHLD2, SHLD3, SIN3A, SIRT1, SKAP1, SLA2, SLAMF1, SLAMF6, SLAMF8, SLC11A1, SLC15A2, SLC15A3, SLC15A4, SLC22A13, SLC39A10, SLC46A2, SMAD3, SMAD7, SMPDL3B, SNX4, SOCS1, SOCS5, SOS1, SPG21, SPHK2, SPI1, SPINK5, SPN, SPNS2, SPPL2A, SPPL2B, SPPL3, SRC, STAP1, STAT2, STAT5B, STAT6, STING1, STK11, STOML2, STX4, STX7, STXBP1, STXBP2, SUPT6H, SUSD4, SYK, TAPBP, TAPBPL, TASL, TBK1, TBX21, TEC, TESPA1, TFRC, TGFB1, TGFB2, THEMIS, THEMIS2, THOC1, THY1, TICAM1, TICAM2, TIFA, TIRAP, TKFC, TLR1, TLR10, TLR2, TLR3, TLR4, TLR5, TLR6, TLR7, TLR8, TLR9, TNF, TNFAIP3, |

| Gene sets name        | Gene                                                                                                                                                                                                                                                                                                                                                                                                                                                                                                                                                                                                                                                                                                                                                                                                                                                                                                                                                                                                                                                                                                                                                                                                                                                                                                                                                                                                                                                                                                                                                                                                                                                                                                                                                                                                                                                                                                                                                                                                                                                                                                                                                                                                                                                                                                                                                                                                                                                                                                                                                                                                                                                                                                                                                                                                                                                                                                                                                         |
|-----------------------|--------------------------------------------------------------------------------------------------------------------------------------------------------------------------------------------------------------------------------------------------------------------------------------------------------------------------------------------------------------------------------------------------------------------------------------------------------------------------------------------------------------------------------------------------------------------------------------------------------------------------------------------------------------------------------------------------------------------------------------------------------------------------------------------------------------------------------------------------------------------------------------------------------------------------------------------------------------------------------------------------------------------------------------------------------------------------------------------------------------------------------------------------------------------------------------------------------------------------------------------------------------------------------------------------------------------------------------------------------------------------------------------------------------------------------------------------------------------------------------------------------------------------------------------------------------------------------------------------------------------------------------------------------------------------------------------------------------------------------------------------------------------------------------------------------------------------------------------------------------------------------------------------------------------------------------------------------------------------------------------------------------------------------------------------------------------------------------------------------------------------------------------------------------------------------------------------------------------------------------------------------------------------------------------------------------------------------------------------------------------------------------------------------------------------------------------------------------------------------------------------------------------------------------------------------------------------------------------------------------------------------------------------------------------------------------------------------------------------------------------------------------------------------------------------------------------------------------------------------------------------------------------------------------------------------------------------------------|
| IMMUNE SYSTEM PROCESS | <p>TNFRSF14, TNFRSF1B, TNFRSF21, TNFSF13, TNFSF13B, TNFSF4, TNIP1, TNIP2, TNIP3, TOMM70, TP53BP1, TRAF2, TRAF3, TRAF6, TRAFD1, TRAT1, TRBC1, TRBC2, TRDC, TREM2, TREML4, TREX1, TRIL, TRIM15, TRIM21, TRIM25, TRIM27, TRIM41, TRIM5, TRIM56, TRIM6, TRIM62, TRPM4, TSPAN6, TTLL12, TXK, TYRO3, TYROBP, UBASH3A, UBE2K, UBE2N, UBQLN1, UFD1, UNC13D, UNC93B1, USP15, USP17L2, USP18, USP27X, USP29, VAMP7, VAMP8, VAV1, VAV2, VAV3, VSIG4, VSIR, VTCN1, WAS, WDFY1, WNK1, WNT5A, XBP1, XCL1, XIAP, XRCC5, XRCC6, YES1, YTHDF2, YTHDF3, ZAP70, ZBP1, ZBTB1, ZBTB7B, ZC3H12A, ZCCHC3, ZDHHC5, ZNFX1, ZP3, ZP4</p> <p>ACIN1, ACKR2, ACKR4, ACVR1B, ACVR2A, ADGRE5, AIM2, AIMP1, AKT1, ALAS2, ANXA11, APLN, APOA1, APOA2, APOA4, APOBEC3F, APOBEC3G, AQP9, ARHGDI1, ATP6V0A2, AZU1, BCAR1, BCL10, BCL2, BLNK, BNIP3, BNIP3L, BST1, BST2, C1QBP, C2, C5AR1, CADM1, CALCA, CARTPT, CCL18, CCL19, CCL2, CCL20, CCL21, CCL22, CCL23, CCL24, CCL25, CCL26, CCL27, CCL4, CCL5, CCR1, CCR2, CCR4, CCR5, CCR6, CCR8, CCR9, CD164, CD1D, CD2, CD22, CD24, CD274, CD276, CD28, CD34, CD3D, CD3E, CD4, CD40LG, CD47, CD7, CD74, CD79A, CD79B, CD83, CD86, CD96, CDC42, CDK6, CEACAM8, CEBPB, CEBPG, CFHR1, CHST4, CHUK, CIITA, CKLF, CLEC7A, CMKLR1, CNIH1, CNR2, COLEC12, CRHR1, CRTAM, CSF1, CST7, CTLA4, CTSC, CTSE, CTSG, CTSS, CTSW, CX3CL1, CXCL12, CXCL13, CXCL8, CXCR2, CXCR4, DCSTAMP, DEFA1, DEFB1, DEFB103A, DEFB118, DEFB127, DEFB4A, DMBT1, DOCK2, DPP4, DPP8, DYRK3, EBI3, ELF4, ELP1, ERAP2, EREG, ETS1, FCAR, FCGR1A, FCGR2B, FCGR3A, FCGR3B, FCGRT, FCN1, FCN2, FOXO3, FOXP3, FTH1, FYB1, FYN, GBP2, GEM, GLMN, GPI, GPR183, GPR65, GTPBP1, GZMA, HAMP, HCLS1, HDAC4, HDAC5, HDAC7, HDAC9, HELLS, HLA-DRB3, HRH2, ICOSLG, IFI16, IFI6, IFITM2, IFITM3, IFNK, IFNL1, IFNLR1, IGSF6, IK, IKBKG, IL10, IL10RB, IL12A, IL12B, IL15, IL16, IL17A, IL17B, IL18, IL18BP, IL1R2, IL2, IL21, IL27, IL27RA, IL2RA, IL2RG, IL31RA, IL32, IL4, IL4R, IL6, IL6R, IL6ST, IL7, IL7R, INHA, INHBA, INS, IRAG2, IRF8, ITGB2, JAG2, KAT6A, KAT8, KIR2DL1, KIR2DL3, KIRREL3, KMT2A, KRT1, LAT, LAT2, LAX1, LCK, LCP2, LDB1, LIG1, LIG3, LILRB2, LST1, LTB4R, LTF, LY75, LY86, LYN, MADCAM1, MAFB, MAL, MALT1, MAP3K7, MAP4K1, MAP4K2, MBL2, MBP, MIA3, MLF1, MMP9, MNX1, MR1, MS4A1, MS4A2, MYH9, NCF4, NCK1, NCK2, NCOA6, NCR1, NFAM1, NFIL3, NHEJ1, NLRC3, NOTCH2, NOTCH4, OPRD1, OPRK1, PAX5, PDCD1, PF4, POU2AF1, POU2F2, PRELID1, PREX1, PRG3, PRKRA, PRL, PSMB10, PTAFR, PTGDR2, PTGER4, PTPRC, PYDC1, RAB3D, RAG1, RASGRP4, RFX1, RGS1, RPS19, RSAD2, RUNX1, S1PR4, SAA1, SART1, SCG2, SCIN, SECTM1, SEMA3C, SEMA4D, SEMA7A, SFTPD, SIRPG, SIT1, SKAP1, SLA2, SNRK, SOCS5, SOD1, SP2, SPACA3, SPI1, SPINK5, ST6GAL1, SYK, TFAZZIN, TAPBP, TARBP2, TBX1, TCF12, TCF7, TENM1, TGFB1, TGFB2, THY1, TLR4, TLR7, TLR8, TNFAIP1, TNFRSF14, TNFRSF4, TNFSF13, TPD52, TRAF2, TRAF6, TRAT1, TREM1, TREM2, TRIM22, UBE2N, VIPR1, VTN, WAS, XBP1, YTHDF2, ZAP70, ZBTB16, ZEB1,</p> |

| Gene sets name       | Gene                                                                                                                                                                                                                                                                                                                                                                                                                                                                                                                                                                                                                                                                                                                                                                                                                                                                                                                                                                                                                                                                                                                                                                                                                                                                                                                                                                                                                                                                                                                                                                                                                                                                                                                                                                                                                                                                                                                                                                                                                                                                                                                                                                                                                                                                                                                                                                                                                                                                                                                                                                                                                                                                                                                                                                                                                                                                                     |
|----------------------|------------------------------------------------------------------------------------------------------------------------------------------------------------------------------------------------------------------------------------------------------------------------------------------------------------------------------------------------------------------------------------------------------------------------------------------------------------------------------------------------------------------------------------------------------------------------------------------------------------------------------------------------------------------------------------------------------------------------------------------------------------------------------------------------------------------------------------------------------------------------------------------------------------------------------------------------------------------------------------------------------------------------------------------------------------------------------------------------------------------------------------------------------------------------------------------------------------------------------------------------------------------------------------------------------------------------------------------------------------------------------------------------------------------------------------------------------------------------------------------------------------------------------------------------------------------------------------------------------------------------------------------------------------------------------------------------------------------------------------------------------------------------------------------------------------------------------------------------------------------------------------------------------------------------------------------------------------------------------------------------------------------------------------------------------------------------------------------------------------------------------------------------------------------------------------------------------------------------------------------------------------------------------------------------------------------------------------------------------------------------------------------------------------------------------------------------------------------------------------------------------------------------------------------------------------------------------------------------------------------------------------------------------------------------------------------------------------------------------------------------------------------------------------------------------------------------------------------------------------------------------------------|
| GOBP IMMUNE RESPONSE | <p>ZNF675</p> <p>A2M, ABL1, ACKR2, ACKR3, ACKR4, ACOD1, ACTG1, ACTR2, ACTR3, ADA, ADAM15, ADAM17, ADAM8, ADAMDEC1, ADAMTS13, ADAR, ADARB1, ADCY7, ADGRB1, ADGRE1, ADGRE2, ADGRE5, ADORA2B, AGER, AHR, AICDA, AIF1, AIM2, AIRE, AKAP1, AKAP8, AKIRIN2, ALCAM, ALOX15, ALOX5, ALPK1, AMBP, ANG, ANGPT1, ANKHD1, ANKRD17, ANXA1, ANXA3, AP1G1, AP3B1, APBB1IP, APCS, APLF, APLN, APOA1, APOA2, APOA4, APOBEC3A, APOBEC3B, APOBEC3C, APOBEC3D, APOBEC3F, APOBEC3G, APOBEC3H, APOE, APOL1, APP, APPL1, APPL2, AQP4, ARG1, ARG2, ARHGEF2, ARID5A, ARL8B, ARRB2, ASS1, ATAD3A, ATAD5, ATG5, ATP6V0A2, ATP7A, AXL, AZGP1, AZU1, B2M, BACH2, BAG6, BANF1, BANK1, BATF, BAX, BCAR1, BCL10, BCL2, BCL3, BCL6, BCL6B, BCR, BIRC2, BIRC3, BLK, BLNK, BMP6, BMPR1A, BMX, BPI, BPIFA1, BPIFB1, BPIFB3, BST1, BST2, BTK, BTLA, BTN1A1, BTN2A1, BTN2A2, BTN2A3P, BTN3A1, BTN3A2, BTN3A3, BTNL10, BTNL2, BTNL3, BTNL8, BTNL9, C12orf4, C17orf99, C1QA, C1QB, C1QBP, C1QC, C1R, C1RL, C1S, C2, C3, C3AR1, C4A, C4B, C4BPA, C4BPB, C5, C5AR1, C5AR2, C6, C7, C8A, C8B, C8G, C9, CACNB3, CACTIN, CADM1, CALCOCO2, CAMK4, CAMP, CARD11, CARD8, CARD9, CASP1, CASP4, CASP6, CASP8, CAV1, CBL, CBLB, CCDC92, CCL1, CCL11, CCL13, CCL14, CCL15, CCL16, CCL17, CCL18, CCL19, CCL2, CCL20, CCL21, CCL22, CCL23, CCL24, CCL25, CCL26, CCL27, CCL28, CCL3, CCL3L1, CCL3L3, CCL4, CCL5, CCL7, CCL8, CCR1, CCR10, CCR2, CCR3, CCR4, CCR5, CCR6, CCR7, CCR8, CCR9, CCRL2, CD14, CD160, CD164, CD177, CD180, CD19, CD1A, CD1B, CD1C, CD1D, CD1E, CD200, CD200R1, CD209, CD22, CD226, CD24, CD244, CD247, CD27, CD274, CD276, CD28, CD300A, CD300LF, CD33, CD36, CD38, CD4, CD40, CD40LG, CD46, CD47, CD48, CD55, CD58, CD59, CD5L, CD6, CD68, CD7, CD70, CD74, CD79A, CD79B, CD80, CD81, CD83, CD84, CD86, CD8A, CD8B, CD8B2, CD96, CDC37, CDC42, CDC42EP2, CDC42EP4, CDH17, CEACAM1, CEACAM8, CEBPB, CEBPG, CERT1, CFB, CFD, CFH, CFHR1, CFHR5, CFI, CFP, CGAS, CH25H, CHGA, CHID1, CHIT1, CHST4, CHUK, CIITA, CITED1, CLC, CLCF1, CLDN1, CLEC10A, CLEC12B, CLEC2A, CLEC4A, CLEC4C, CLEC4D, CLEC4E, CLEC4G, CLEC4M, CLEC5A, CLEC6A, CLEC7A, CLNK, CLPB, CLU, CMKLR1, CMTM3, CNIH1, CNOT7, CNPY3, CNR1, CNR2, COCH, COL3A1, COLEC10, COLEC11, COLEC12, CORO1A, CPLX2, CR1, CR1L, CR2, CRACR2A, CRCP, CREBBP, CRHR1, CRIP1, CRISP3, CRK, CRKL, CRP, CRTAM, CSF1, CSF1R, CSF2, CSF2RB, CSF3, CSK, CST7, CST9, CST9L, CST9LP1, CTLA4, CTSC, CTSG, CTSH, CTSK, CTSL, CTSS, CTSV, CTSW, CUEDC2, CX3CL1, CX3CR1, CXCL1, CXCL10, CXCL11, CXCL12, CXCL13, CXCL14, CXCL16, CXCL2, CXCL3, CXCL5, CXCL6, CXCL8, CXCL9, CXCR1, CXCR2, CXCR3, CXCR4, CXCR5, CXCR6, CYBA, CYBB, CYBC1, CYLD, CYP11B1, CYP27B1, CYRIB, CYSLTR1, CYSLTR2, DAB2IP, DAPK1, DAPK3, DBNL, DCLRE1C, DCST1, DDX1, DDX21, DDX3X, DDX58, DDX60, DEFA1, DEFA1B, DEFA3, DEFA4, DEFA5, DEFA6, DEFB1, DEFB104A, DEFB104B, DEFB105A, DEFB105B, DEFB106A, DEFB106B,</p> |

| Gene sets name | Gene                                                                                                                                                                                                                                                                                                                                                                                                                                                                                                                                                                                                                                                                                                                                                                                                                                                                                                                                                                                                                                                                                                                                                                                                                                                                                                                                                                                                                                                                                                                                                                                                                                                                                                                                                                                                                                                                                                                                                                                                                                                                                                                                                                                                                                                                                                                                                                                                                                                                                                                                                                                                                                                                                                                                                                                                                                                                                                                                                                                                                                                                                   |
|----------------|----------------------------------------------------------------------------------------------------------------------------------------------------------------------------------------------------------------------------------------------------------------------------------------------------------------------------------------------------------------------------------------------------------------------------------------------------------------------------------------------------------------------------------------------------------------------------------------------------------------------------------------------------------------------------------------------------------------------------------------------------------------------------------------------------------------------------------------------------------------------------------------------------------------------------------------------------------------------------------------------------------------------------------------------------------------------------------------------------------------------------------------------------------------------------------------------------------------------------------------------------------------------------------------------------------------------------------------------------------------------------------------------------------------------------------------------------------------------------------------------------------------------------------------------------------------------------------------------------------------------------------------------------------------------------------------------------------------------------------------------------------------------------------------------------------------------------------------------------------------------------------------------------------------------------------------------------------------------------------------------------------------------------------------------------------------------------------------------------------------------------------------------------------------------------------------------------------------------------------------------------------------------------------------------------------------------------------------------------------------------------------------------------------------------------------------------------------------------------------------------------------------------------------------------------------------------------------------------------------------------------------------------------------------------------------------------------------------------------------------------------------------------------------------------------------------------------------------------------------------------------------------------------------------------------------------------------------------------------------------------------------------------------------------------------------------------------------------|
|                | DEFB107A, DEFB107B, DEFB108A, DEFB108B, DEFB110, DEFB112, DEFB113, DEFB114, DEFB115, DEFB116, DEFB118, DEFB119, DEFB121, DEFB123, DEFB124, DEFB125, DEFB126, DEFB127, DEFB128, DEFB131A, DEFB131B, DEFB132, DEFB133, DEFB134, DEFB135, DEFB4A, DENND1B, DGKZ, DHX36, DHX58, DHX9, DLL1, DMBT1, DNASE1, DNASE1L3, DNASE2, DOCK10, DOCK11, DOCK2, DPP8, DRD2, DTX3L, DUSP10, DUSP22, DUSP3, DYSF, EBI3, ECM1, ECSIT, EDA, EDN1, EIF2AK2, EIF2AK4, EIF2B1, EIF2B2, EIF2B3, EIF2B4, EIF2B5, ELANE, ELF1, ELF4, EMP2, ENDOU, ENPP1, ENPP2, ENPP3, ENTPD7, EOMES, EP300, EPG5, EPHB2, EPRS1, ERAP1, ERAP2, ERBIN, ERCC1, EREG, ERMAP, ESR1, ETS1, EXO1, EXOSC3, EXOSC6, EXOSC9, EXT1, EZR, F12, F2, F2RL1, FADD, FAM3A, FAS, FASLG, FBXO38, FBXO9, FCAMR, FCAR, FCER1A, FCER1G, FCER2, FCGR1A, FCGR1B, FCGR2A, FCGR2B, FCGR2C, FCGR3A, FCGR3B, FCGRT, FCHO1, FCN1, FCN2, FCN3, FCRL3, FCRL4, FCRLB, FER, FER1L5, FES, FFAR2, FFAR3, FGA, FGB, FGL1, FGL2, FGR, FKBP1A, FLNB, FLOT1, FLOT2, FOXF1, FOXJ1, FOXP1, FOXP3, FPR1, FPR2, FPR3, FRK, FTH1, FURIN, FUT7, FYB1, FYB2, FYN, FZD5, G3BP1, G3BP2, GAB2, GALP, GAPDH, GAPT, GATA1, GATA2, GATA3, GATA6, GBF1, GBP1, GBP2, GBP3, GBP4, GBP5, GBP6, GBP7, GCH1, GCSAM, GCSAML, GEM, GFER, GFI1, GNL1, GNLY, GP2, GPATCH3, GPER1, GPI, GPLD1, GPR108, GPR151, GPR183, GPR31, GPR32, GPR32P1, GPR33, GPR65, GPRC5B, GPS2, GPX1, GRAMD4, GRN, GSDMD, GSN, GTPBP1, GZMA, GZMB, GZMM, H2BC10, H2BC11, H2BC12, H2BC21, H2BC4, H2BC6, H2BC7, H2BC8, H2BS1, HAMP, HAVCR2, HCK, HCST, HERC5, HEXIM1, HFE, HHLA2, HK1, HLA-A, HLA-B, HLA-C, HLA-DMA, HLA-DMB, HLA-DOA, HLA-DOB, HLA-DPA1, HLA-DPB1, HLA-DQA1, HLA-DQA2, HLA-DQB1, HLA-DQB2, HLA-DRA, HLA-DRB1, HLA-DRB3, HLA-DRB4, HLA-DRB5, HLA-E, HLA-F, HLA-G, HLA-H, HLX, HMCES, HMGB1, HMGB2, HMGB3, HMGN2, HMHB1, HMOX1, HMSD, HPRT1, HPX, HRAS, HRG, HRH2, HSP90AA1, HSP90AB1, HSPA1A, HSPA1B, HSPD1, ICAM1, ICOS, ICOSLG, IDO1, IFI16, IFI27, IFI35, IFI44, IFI44L, IFI6, IFIH1, IFIT1, IFIT1B, IFIT2, IFIT3, IFIT5, IFITM1, IFITM2, IFITM3, IFNA1, IFNA10, IFNA13, IFNA14, IFNA16, IFNA17, IFNA2, IFNA21, IFNA4, IFNA5, IFNA6, IFNA7, IFNA8, IFNAR1, IFNAR2, IFNB1, IFNE, IFNG, IFNK, IFNL1, IFNL2, IFNL3, IFNL4, IFNLR1, IFNW1, IGF1R, IGHA1, IGHA2, IGHD, IGHD1-1, IGHE, IGHG1, IGHG2, IGHG3, IGHG4, IGHJ1, IGHM, IGHV1-18, IGHV1-24, IGHV1-3, IGHV1-45, IGHV1-58, IGHV1-69, IGHV1-69-2, IGHV1-69D, IGHV1OR15-1, IGHV2-26, IGHV2-5, IGHV2-70, IGHV2-70D, IGHV3-11, IGHV3-13, IGHV3-15, IGHV3-16, IGHV3-20, IGHV3-21, IGHV3-23, IGHV3-30, IGHV3-33, IGHV3-35, IGHV3-38, IGHV3-43, IGHV3-48, IGHV3-49, IGHV3-53, IGHV3-64, IGHV3-64D, IGHV3-66, IGHV3-7, IGHV3-72, IGHV3-73, IGHV3-74, IGHV4-28, IGHV4-31, IGHV4-34, IGHV4-39, IGHV4-4, IGHV4-59, IGHV4-61, IGHV5-10-1, IGHV5-51, IGHV6-1, IGHV7-4-1, IGHV7-81, IGHV8-51-1, IGKC, IGKJ1, IGKV1-12, IGKV1-13, IGKV1-16, IGKV1-17, IGKV1-27, IGKV1-37, IGKV1-39, IGKV1-5, IGKV1-6, IGKV1-8, IGKV1-9, IGKV1D-12, IGKV1D-13, IGKV1D-17, IGKV1D-33, IGKV1D-37, IGKV1D-39, IGKV1D-42, IGKV1D-43, IGKV1D-8, IGKV2-24, IGKV2-28, IGKV2-29, IGKV2-30, |

| Gene sets name | Gene                                                                                                                                                                                                                                                                                                                                                                                                                                                                                                                                                                                                                                                                                                                                                                                                                                                                                                                                                                                                                                                                                                                                                                                                                                                                                                                                                                                                                                                                                                                                                                                                                                                                                                                                                                                                                                                                                                                                                                                                                                                                                                                                                                                                                                                                                                                                                                                                                                                                                                                                                                                                                                                                                                                                                                                                                                                                                                                                                                                                                                                                                                                                                        |
|----------------|-------------------------------------------------------------------------------------------------------------------------------------------------------------------------------------------------------------------------------------------------------------------------------------------------------------------------------------------------------------------------------------------------------------------------------------------------------------------------------------------------------------------------------------------------------------------------------------------------------------------------------------------------------------------------------------------------------------------------------------------------------------------------------------------------------------------------------------------------------------------------------------------------------------------------------------------------------------------------------------------------------------------------------------------------------------------------------------------------------------------------------------------------------------------------------------------------------------------------------------------------------------------------------------------------------------------------------------------------------------------------------------------------------------------------------------------------------------------------------------------------------------------------------------------------------------------------------------------------------------------------------------------------------------------------------------------------------------------------------------------------------------------------------------------------------------------------------------------------------------------------------------------------------------------------------------------------------------------------------------------------------------------------------------------------------------------------------------------------------------------------------------------------------------------------------------------------------------------------------------------------------------------------------------------------------------------------------------------------------------------------------------------------------------------------------------------------------------------------------------------------------------------------------------------------------------------------------------------------------------------------------------------------------------------------------------------------------------------------------------------------------------------------------------------------------------------------------------------------------------------------------------------------------------------------------------------------------------------------------------------------------------------------------------------------------------------------------------------------------------------------------------------------------------|
|                | IGKV2-40, IGKV2D-24, IGKV2D-26, IGKV2D-28, IGKV2D-29, IGKV2D-30, IGKV3-15, IGKV3-20, IGKV3-7, IGKV3D-11, IGKV3D-15, IGKV3D-20, IGKV3D-7, IGKV4-1, IGKV5-2, IGKV6-21, IGKV6D-21, IGKV6D-41, IGLC1, IGLC2, IGLC3, IGLC6, IGLC7, IGLJ1, IGLL1, IGLL5, IGLV1-36, IGLV1-40, IGLV1-44, IGLV1-47, IGLV1-50, IGLV1-51, IGLV10-54, IGLV11-55, IGLV2-11, IGLV2-14, IGLV2-18, IGLV2-23, IGLV2-33, IGLV2-8, IGLV3-1, IGLV3-10, IGLV3-12, IGLV3-16, IGLV3-19, IGLV3-21, IGLV3-22, IGLV3-25, IGLV3-27, IGLV3-32, IGLV3-9, IGLV4-3, IGLV4-60, IGLV4-69, IGLV5-37, IGLV5-45, IGLV5-48, IGLV5-52, IGLV6-57, IGLV7-43, IGLV7-46, IGLV8-61, IGLV9-49, IGSF6, IKBKB, IKBKE, IKBKG, IL10, IL10RB, IL12A, IL12B, IL12RB1, IL13, IL13RA2, IL15, IL16, IL17A, IL17B, IL17F, IL17RA, IL18, IL18BP, IL18R1, IL18RAP, IL19, IL1A, IL1B, IL1F10, IL1R1, IL1R2, IL1RAP, IL1RL1, IL1RL2, IL1RN, IL2, IL20RB, IL21, IL21R, IL23A, IL23R, IL25, IL27, IL27RA, IL2RA, IL2RG, IL3, IL31RA, IL32, IL34, IL36A, IL36B, IL36G, IL36RN, IL37, IL4, IL4I1, IL4R, IL5, IL5RA, IL6, IL6R, IL6ST, IL7, IL7R, IL9, IL9R, ILRUN, INAVA, INPP5D, INS, IPO7, IRAK1, IRAK1BP1, IRAK2, IRAK3, IRAK4, IRF1, IRF3, IRF4, IRF5, IRF7, IRF8, IRGM, ISG15, ISG20, ITCH, ITFG2, ITGAD, ITGAL, ITGAM, ITGB2, ITGB6, ITGB8, ITK, ITM2A, JAG1, JAK1, JAK2, JAK3, JAM3, JCHAIN, KAAG1, KARS1, KCNN4, KDM5D, KHDRBS1, KIF5B, KIR2DL1, KIR2DL3, KIR2DL4, KIR2DS1, KIR2DS2, KIR2DS5, KIR3DL1, KIR3DS1, KIT, KLHL6, KLK3, KLK5, KLK7, KLRC1, KLRC2, KLRC3, KLRC4, KLRC4-KLRK1, KLRD1, KLRF2, KLRG1, KLRK1, KMT5B, KMT5C, KRT1, KRT16, KRT6A, KYNU, LACC1, LAG3, LAIR1, LAMP1, LAMP3, LAPTM5, LAT, LAT2, LAX1, LBP, LCK, LCN2, LCP1, LCP2, LEAP2, LEF1, LEP, LFNG, LGALS1, LGALS3, LGALS9, LGR4, LIF, LIG4, LILRA1, LILRA2, LILRA3, LILRA4, LILRA5, LILRA6, LILRB1, LILRB2, LILRB3, LILRB4, LILRB5, LIME1, LIMK1, LOXL3, LPXN, LRP1, LRP8, LRRC14, LRRC19, LSM14A, LST1, LTA, LTB, LTB4R, LTBR, LTF, LY75, LY86, LY9, LY96, LYAR, LYN, LYST, LYZ, MAD2L2, MADCAM1, MALT1, MAP2K4, MAP2K6, MAP2K7, MAP3K1, MAP3K14, MAP3K5, MAP3K7, MAP4K2, MAPK1, MAPK10, MAPK14, MAPK8, MAPK9, MAPKAPK2, MAPKAPK3, MARCHF1, MARCHF2, MARCHF8, MARCO, MASP1, MASP2, MATR3, MAVS, MBL2, MBP, MCOLN1, MCOLN2, MDK, MED1, MEF2C, MEFV, METTL3, MFAP4, MFHAS1, MFNG, MICA, MICB, MID2, MIF, MILR1, MIR105-1, MIR136, MIR140, MIR146A, MIR17, MIR181B1, MIR18A, MIR19A, MIR19B1, MIR21, MIR34A, MIR520B, MIR520E, MIR6869, MIR708, MKRN2, MLH1, MMP12, MNDA, MOG, MPEG1, MR1, MRC1, MRGPRX2, MS4A1, MS4A2, MSH2, MSH6, MSRB1, MST1R, MTOR, MUC7, MUL1, MX1, MX2, MYB, MYC, MYD88, MYLPF, MYO1C, MYO1G, N4BP1, NAIP, NBN, NCF1, NCF2, NCKAP1L, NCR1, NCR3, NCR3LG1, NDFIP1, NECTIN1, NECTIN2, NFAM1, NFATC2, NFE2L2, NFIL3, NFILZ, NFKB2, NFKBIA, NFKBID, NFKBIL1, NFKBIZ, NINJ1, NKG7, NKX2-3, NLRC3, NLRC4, NLRC5, NLRP1, NLRP10, NLRP2, NLRP2B, NLRP3, NLRP6, NLRP9, NLRX1, NMI, NOD1, NOD2, NONO, NOP53, NOS2, NOTCH1, NOTCH2, NPLOC4, NPY, NPY5R, NR1D1, NR1H2, NR1H3, NR1H4, NR4A3, NRROS, NSD2, NUB1, OAS1, OAS2, OAS3, OASL, OPRD1, OPRK1, OPRM1, OPTN, ORAI1, OSM, OTOP1, OTUB1, OTUD4, OTUD7B, OTULIN, P2RX7, PADI4, PAG1, PAK1, PAK2, |

| Gene sets name | Gene                                                                                                                                                                                                                                                                                                                                                                                                                                                                                                                                                                                                                                                                                                                                                                                                                                                                                                                                                                                                                                                                                                                                                                                                                                                                                                                                                                                                                                                                                                                                                                                                                                                                                                                                                                                                                                                                                                                                                                                                                                                                                                                                                                                                                                                                                                                                                                                                                                                                                                                                                                                                                                                                                                                                                                                                                                                                                                                                                                       |
|----------------|----------------------------------------------------------------------------------------------------------------------------------------------------------------------------------------------------------------------------------------------------------------------------------------------------------------------------------------------------------------------------------------------------------------------------------------------------------------------------------------------------------------------------------------------------------------------------------------------------------------------------------------------------------------------------------------------------------------------------------------------------------------------------------------------------------------------------------------------------------------------------------------------------------------------------------------------------------------------------------------------------------------------------------------------------------------------------------------------------------------------------------------------------------------------------------------------------------------------------------------------------------------------------------------------------------------------------------------------------------------------------------------------------------------------------------------------------------------------------------------------------------------------------------------------------------------------------------------------------------------------------------------------------------------------------------------------------------------------------------------------------------------------------------------------------------------------------------------------------------------------------------------------------------------------------------------------------------------------------------------------------------------------------------------------------------------------------------------------------------------------------------------------------------------------------------------------------------------------------------------------------------------------------------------------------------------------------------------------------------------------------------------------------------------------------------------------------------------------------------------------------------------------------------------------------------------------------------------------------------------------------------------------------------------------------------------------------------------------------------------------------------------------------------------------------------------------------------------------------------------------------------------------------------------------------------------------------------------------------|
|                | PAK3, PARK7, PARP14, PARP3, PARP9, PAWR, PAX5, PAXIP1, PCBP2, PCK1, PDCD1, PDCD1LG2, PDE12, PDE4B, PDE4D, PDPK1, PELI1, PF4, PF4V1, PGC, PGLYRP1, PGLYRP2, PGLYRP3, PGLYRP4, PHB, PHB2, PHPT1, PI3, PIANP, PIGR, PIK3AP1, PIK3CA, PIK3CD, PIK3CG, PIK3R6, PJA2, PKHD1L1, PKN1, PLA2G1B, PLA2G2D, PLA2G2F, PLA2G3, PLA2G4A, PLA2G5, PLA2G6, PLCG1, PLCG2, PLCL2, PLD2, PLD4, PLEC, PLEKHA1, PLEKHM2, PLK2, PLPP4, PLSCR1, PML, PNMA1, PNP, POLR3A, POLR3B, POLR3C, POLR3D, POLR3E, POLR3F, POLR3G, POLR3H, POLR3K, POU2AF1, POU2F2, PPARG, PPBP, PPP1R14B, PPP2R3C, PPP3CB, PPP6C, PQBP1, PRAM1, PRDM1, PRDX1, PRELID1, PRF1, PRG2, PRG3, PRG4, PRKCB, PRKCD, PRKCE, PRKCH, PRKCQ, PRKCZ, PRKD1, PRKD2, PRKDC, PRKRA, PRNP, PRR7, PRSS2, PRSS3, PRTN3, PSEN1, PSG9, PSMA1, PSMB10, PSMB4, PSPC1, PSTPIP1, PTAFR, PTGDR, PTGDR2, PTGDS, PTGER4, PTK2, PTK2B, PTK6, PTPN1, PTPN11, PTPN2, PTPN22, PTPN6, PTPRC, PTPRD, PTPRJ, PTPRS, PTX3, PUM1, PUM2, PVR, PVRIG, PXDN, PYCARD, PYDC1, PYDC2, PYHIN1, RAB11FIP2, RAB17, RAB20, RAB27A, RAB29, RAB43, RAB7B, RABGEF1, RAC2, RAET1E, RAET1G, RAET1L, RAG1, RAG2, RAP1GAP, RAP1GAP2, RAPGEF3, RAPGEF4, RARA, RARRES2, RASGRP1, RBCK1, RBM14, RBPJ, RC3H1, RC3H2, REG1A, REG1B, REG3A, REG3G, REL, RELA, RELB, RFTN1, RFX1, RGCC, RGS1, RHBDF2, RIF1, RIOK3, RIPK2, RIPK3, RNASE2, RNASE3, RNASE6, RNASE7, RNASE8, RNASET2, RNF125, RNF135, RNF166, RNF168, RNF185, RNF187, RNF19B, RNF31, RNF39, RNF8, ROMO1, RORA, RORC, RPL13A, RPL30, RPL39, RPS19, RPS3, RPS6, RPS6KA3, RPS6KB1, RSAD2, RTN4, S100A12, S100A13, S100A14, S100A7, S100A8, S100A9, S1PR4, SAMHD1, SAMSN1, SARM1, SASH3, SBNO2, SCAP, SCARA3, SCART1, SCIMP, SCNN1B, SDHAF4, SEC14L1, SECTM1, SELENOS, SEMA3C, SEMA4A, SEMA4D, SEMA7A, SEMG1, SEMG2, SENP7, SERINC3, SERINC5, SERPINB4, SERPINB9, SERPING1, SETD2, SFPQ, SFTPD, SH2B2, SH2D1A, SH2D1B, SHFL, SHLD1, SHLD2, SHLD3, SHMT2, SIGLEC10, SIN3A, SIPA1, SIRPA, SIRT1, SIRT2, SIT1, SKAP1, SKP2, SLA, SLA2, SLAMF1, SLAMF6, SLAMF7, SLAMF8, SLAMF9, SLC11A1, SLC15A2, SLC15A3, SLC15A4, SLC22A13, SLC26A6, SLC30A8, SLC39A10, SLC46A2, SLC7A5, SLPI, SMAD3, SMAD6, SMAD7, SMPD1, SMPDL3B, SNAP23, SNCA, SNX4, SNX6, SOCS1, SOCS5, SOS1, SP100, SP2, SPAG11A, SPAG11B, SPG21, SPHK2, SPI1, SPINK5, SPN, SPNS2, SPON2, SPPL2A, SPPL2B, SPPL3, SRC, SRMS, SRPK1, SRPK2, SSC5D, ST3GAL1, ST6GAL1, STAP1, STAT1, STAT2, STAT3, STAT5B, STAT6, STING1, STK11, STMP1, STOML2, STX4, STX7, STX8, STXBP1, STXBP2, STXBP3, STXBP4, STYK1, SUCNR1, SUPT6H, SUSD4, SWAP70, SYK, SYNCRIP, TAP1, TAP2, TAPBP, TAPBPL, TARM1, TASL, TBK1, TBX21, TCF12, TCF7, TCIM, TCIRG1, TDGF1, TEC, TENM1, TESPA1, TF, TFE3, TFEB, TFRC, TGFB1, TGFB2, TGFB3, TGFB3, TGFB3, THBS1, THEMIS, THEMIS2, THOC1, THY1, TICAM1, TICAM2, TIFA, TIRAP, TKFC, TLR1, TLR10, TLR2, TLR3, TLR4, TLR5, TLR6, TLR7, TLR8, TLR9, TMEM106A, TMEM98, TMIGD2, TNF, TNFAIP1, TNFAIP3, TNFAIP8L2, TNFRSF11A, TNFRSF13B, TNFRSF13C, TNFRSF14, TNFRSF17, |

| Gene sets name                                       | Gene                                                                                                                                                                                                                                                                                                                                                                                                                                                                                                                                                                                                                                                                                                                                                                                                                                                                                                                                                                                                                                                                                                                                                                                                                                                                                                                                                                                                                                                                                                                                                                                                                                                                                                                                                                                                                                                                                                                                                                                                                                                                                                                                                                                                                                                                                                                                                                                                                                                                                                                                                                                                                                                                                                                                                                                                                                                                                                                                                       |
|------------------------------------------------------|------------------------------------------------------------------------------------------------------------------------------------------------------------------------------------------------------------------------------------------------------------------------------------------------------------------------------------------------------------------------------------------------------------------------------------------------------------------------------------------------------------------------------------------------------------------------------------------------------------------------------------------------------------------------------------------------------------------------------------------------------------------------------------------------------------------------------------------------------------------------------------------------------------------------------------------------------------------------------------------------------------------------------------------------------------------------------------------------------------------------------------------------------------------------------------------------------------------------------------------------------------------------------------------------------------------------------------------------------------------------------------------------------------------------------------------------------------------------------------------------------------------------------------------------------------------------------------------------------------------------------------------------------------------------------------------------------------------------------------------------------------------------------------------------------------------------------------------------------------------------------------------------------------------------------------------------------------------------------------------------------------------------------------------------------------------------------------------------------------------------------------------------------------------------------------------------------------------------------------------------------------------------------------------------------------------------------------------------------------------------------------------------------------------------------------------------------------------------------------------------------------------------------------------------------------------------------------------------------------------------------------------------------------------------------------------------------------------------------------------------------------------------------------------------------------------------------------------------------------------------------------------------------------------------------------------------------------|
| GOBP<br>REGULATION<br>OF IMMUNE<br>SYSTEM<br>PROCESS | <p>TNFRSF1B, TNFRSF21, TNFRSF4, TNFSF10, TNFSF11, TNFSF12, TNFSF13, TNFSF13B, TNFSF14, TNFSF15, TNFSF18, TNFSF4, TNFSF8, TNFSF9, TNIP1, TNIP2, TNIP3, TNK1, TNK2, TOLLIP, TOMM70, TP53, TP53BP1, TRAF2, TRAF3, TRAF3IP2, TRAF4, TRAF6, TRAFD1, TRAJ3, TRAJ31, TRAJ42, TRAT1, TRAV1-1, TRAV1-2, TRAV10, TRAV12-1, TRAV12-2, TRAV12-3, TRAV13-1, TRAV13-2, TRAV14DV4, TRAV16, TRAV17, TRAV18, TRAV19, TRAV2, TRAV20, TRAV21, TRAV22, TRAV23DV6, TRAV24, TRAV25, TRAV26-1, TRAV26-2, TRAV27, TRAV29DV5, TRAV3, TRAV30, TRAV34, TRAV35, TRAV36DV7, TRAV38-1, TRAV38-2DV8, TRAV39, TRAV4, TRAV40, TRAV41, TRAV5, TRAV6, TRAV7, TRAV8-1, TRAV8-2, TRAV8-3, TRAV8-4, TRAV8-6, TRAV9-1, TRAV9-2, TRBC1, TRBC2, TRBD1, TRBJ1-1, TRBJ1-2, TRBJ1-3, TRBJ1-4, TRBJ1-5, TRBJ1-6, TRBJ2-1, TRBJ2-2, TRBJ2-3, TRBJ2-4, TRBJ2-5, TRBJ2-6, TRBJ2-7, TRBV10-1, TRBV10-2, TRBV10-3, TRBV11-1, TRBV11-2, TRBV11-3, TRBV12-3, TRBV12-4, TRBV12-5, TRBV13, TRBV14, TRBV16, TRBV17, TRBV18, TRBV19, TRBV2, TRBV20-1, TRBV23-1, TRBV24-1, TRBV25-1, TRBV27, TRBV28, TRBV29-1, TRBV3-1, TRBV30, TRBV4-1, TRBV4-2, TRBV5-1, TRBV5-3, TRBV5-4, TRBV5-5, TRBV5-6, TRBV5-7, TRBV6-1, TRBV6-4, TRBV6-5, TRBV6-6, TRBV6-7, TRBV6-8, TRBV7-1, TRBV7-2, TRBV7-3, TRBV7-4, TRBV7-6, TRBV7-7, TRBV7-9, TRBV9, TRDC, TRDD1, TRDJ1, TRDV1, TRDV2, TRDV3, TREM1, TREM2, TREML1, TREML4, TRESX1, TRGC2, TRGJ2, TRGV1, TRGV10, TRGV11, TRGV2, TRGV3, TRGV4, TRGV5, TRGV8, TRGV9, TRIL, TRIM10, TRIM11, TRIM13, TRIM14, TRIM15, TRIM17, TRIM21, TRIM22, TRIM23, TRIM25, TRIM26, TRIM27, TRIM28, TRIM29, TRIM31, TRIM32, TRIM34, TRIM35, TRIM38, TRIM39, TRIM4, TRIM40, TRIM41, TRIM43, TRIM43B, TRIM48, TRIM49, TRIM49B, TRIM49C, TRIM49D1, TRIM49D2, TRIM5, TRIM51, TRIM56, TRIM58, TRIM59, TRIM6, TRIM60, TRIM61, TRIM62, TRIM64, TRIM64B, TRIM64C, TRIM68, TRIM75P, TRIM77, TRIM8, TRIML1, TRIML2, TRPM4, TSC1, TSPAN6, TTC4, TTLL1, TTLL12, TUBB, TUBB4B, TXK, TYK2, TYRO3, TYROBP, UBASH3A, UBD, UBE2K, UBE2N, UBQLN1, UFD1, ULBP1, ULBP2, ULBP3, UNC13D, UNC93B1, UNG, USP14, USP15, USP17L2, USP18, USP27X, USP29, VAMP2, VAMP3, VAMP7, VAMP8, VAV1, VAV2, VAV3, VIM, VNN1, VPREB1, VPREB3, VPS26B, VSIG4, VSIR, VTCN1, VTN, WAS, WDFY1, WFDC10A, WFDC10B, WFDC11, WFDC12, WFDC13, WFDC2, WFDC3, WFDC5, WFDC9, WNK1, WNT5A, WRNIP1, XBP1, XCL1, XCL2, XCR1, XIAP, XRCC5, XRCC6, YES1, YTHDF2, YTHDF3, ZAP70, ZBP1, ZBTB1, ZBTB7B, ZC3H12A, ZC3HAV1, ZCCHC3, ZDHHC1, ZDHHC11, ZDHHC5, ZFPM1, ZNF683, ZNFX1, ZP3, ZP4, ZYX</p> <p>ADA, MIR708, BTNL10, KIR2DS2, CD24, C17orf99, PARP3, IGLL5, MICA, KLRC4-KLRK1, MICOS10-NBL1, DNM1L, NR1H3, TSPAN32, PQBP1, ADAM8, IFNL4, RASGRP1, EBI3, CHST4, RNF41, ADAM10, CDK6, FLOT1, TRIB1, CD96, LRRC17, MIR6869, CDKN1A, FSTL3, IGHV2-70D, IGHV1-69D, IGHV3-64D, LILRB2, ADAR TNIP1, SIRPB1, TLR6, BTN3A3, BTN2A2, NOD1, PIAS3, SPON2, RBM14, VAV3, HAX1, GPNMB, MAD2L2, MERTK, PIBF1, CREB3, CEBPA, CEBPB, CIB1, OLFM4, CXCL13, COLEC10, SH2B2,</p> |



| Gene sets name | Gene                                                                                                                                                                                                                                                                                                                                                                                                                                                                                                                                                                                                                                                                                                                                                                                                                                                                                                                                                                                                                                                                                                                                                                                                                                                                                                                                                                                                                                                                                                                                                                                                                                                                                                                                                                                                                                                                                                                                                                                                                                                                                                                                                                                                                                                                                                                                                                                                                                                                                                                                                                                                                                                                                                                                                                                                                                                                                                                                                                                                                        |
|----------------|-----------------------------------------------------------------------------------------------------------------------------------------------------------------------------------------------------------------------------------------------------------------------------------------------------------------------------------------------------------------------------------------------------------------------------------------------------------------------------------------------------------------------------------------------------------------------------------------------------------------------------------------------------------------------------------------------------------------------------------------------------------------------------------------------------------------------------------------------------------------------------------------------------------------------------------------------------------------------------------------------------------------------------------------------------------------------------------------------------------------------------------------------------------------------------------------------------------------------------------------------------------------------------------------------------------------------------------------------------------------------------------------------------------------------------------------------------------------------------------------------------------------------------------------------------------------------------------------------------------------------------------------------------------------------------------------------------------------------------------------------------------------------------------------------------------------------------------------------------------------------------------------------------------------------------------------------------------------------------------------------------------------------------------------------------------------------------------------------------------------------------------------------------------------------------------------------------------------------------------------------------------------------------------------------------------------------------------------------------------------------------------------------------------------------------------------------------------------------------------------------------------------------------------------------------------------------------------------------------------------------------------------------------------------------------------------------------------------------------------------------------------------------------------------------------------------------------------------------------------------------------------------------------------------------------------------------------------------------------------------------------------------------------|
|                | <p>           HEXIM1, RBCK1, POLR3F, POLR3G, POLR3C, KHDRBS1, CD226, TNFSF13B, FUT9 MASP2, CTSC, TOB2, PLK2, HSPH1, FAXDC2, CCL27, LILRB1, ARID5A, HCST, FGL2, MALT1, LYVE1, TRAFD1, BTNL3, SPINK5, LILRB4, LILRB3, LILRA2, RIPK3, EMILIN1, BTN3A2, BTN3A1, BTN2A1, CD160, CDC37, KAT7, GLMN, HHLA2, CORO1A, IRAK3, DUSP10, PADI2, SHLD3, USP18, IL17F, TREX1, ADCY7, CD300A, PARK7, VSIG4, PHB2, CHRN2, NLRP3, TIRAP, ERMAP, PGLYRP2, MYSM1, SLAMF6, CGAS, FCRL3, GBP5, TNFRSF13C, FAM210B, CLNK, SH2D1B, CLC, TRIM6, EXOSC6, PIK3AP1, CLU, LRRK2, CLPTM1, SLC15A4, H4-16, SPPL3, CCR1, LEO1, CCR6, CCR7, CMTM3, CMKLR1, ZBP2, SPACA3, SPNS2, TMIGD2, CNR1, CNR2, FCRLB, COL3A1, OCSTAMP, ANKRD54, REG3G, TMEM178A, CD200R1, MAP3K8, OTOP1, SLC9B2, IL31RA, PPARGC1B, ADORA1, GPR151, ADORA2A, RAET1E, ADORA2B, CR1, CR1L, CR2, CREB1, CREBBP, CRK, CRKL, CRP, ZBTB46, SIRPA, MAPK14, CSF1, CSF1R, CSF3, CSF3R, CSK, LACC1, LRFN5, IL34, CD300LF, PIK3R6, TICAM1, GCSAML, RC3H1, DCST1, IL23R, CTLA4, PYHIN1, SHLD1, CTNNA1, NFAM1, CTSG, CTSH, BTLA, CTSS, CX3CR1, DAB2IP, CYBA, BTNL9, CYLD, MOSPD2, CYP19A1, CLECL1, CD55, ZFP1, DENND1B, AP1G1, DDT, DDX1, DDX3X, DHX9, CFD, COCH, TMEM64, DHX36, NLRP6, ZNF675, DHPS, DLG1, AGER, DNASE1, DNASE1L3, DNASE2, DPP4, DRD2, JAG1, TSC22D3, DUSP1, DUSP3, GPR183, ECM1, EDN1, EDN2, EDN3, EFN1, EFN2, EFN3, AHR, EGR3, PLPP4, PIANP, ANO6, EIF2B1, NLRC3, AIF1, ELANE, ELF1, FYB2, A2M, APLF, UNC13D, TIGIT, EP300, EPHB2, EPO, ERBB2, EREG, AKT1, ESR1, ESRRA, ETS1, EVI2B, F2RL1, F7, FANCA, FANCD2, PTK2B, FBN1, FCER1A, MS4A2, FCER1G, FCER2, FCGR1A, FCGR1B, FCGR2A, FCGR2B, ADGRF5, FCGR3A, FCGR3B, FCN1, FCN2, MTURN, FER, FES, FGF10, FGL1, FGR, VEGFD, FKBP1A, IKZF3, RAB11FIP2, ZBTB1, KLRK1, FOXF1, PAXIP1, ACIN1, FOXJ1, SWAP70, FOXO3, SARM1, LRCH1, FCHO1, GRAMD4, TLL1, RFTN1, RCOR1, FLOT2, SYT11, PLCL2, PLCB1, PHLPP1, TMEM131L, ICOSLG, FN1, PUM2, SIRT1, ABCB10, TNFRSF13B, SCRIB, CLCF1, FOS, RBFOX2, LILRA4, FPR1, FPR2, DDX58, FPR3, DAPK2, MKRN2, LY96, SLC7A11, CADM1, SHPK, BRD1, DEFB124, ALOX15, IL27, MTOR, FSHB, ABL1, FUT4, FUT7, FYB1, FYN, YTHDF3, XRCC6, GABPA, BCL6B, ZNF683, GCSAM, FBXO7, RHBDD3, KLK5, PRKD2, AMBP, NCR3, ZDHHC5, IL4I1, SAMHD1, SIN3A, TKFC, L3MBTL1, ANKRD17, APPL1, LSM14A, LRRC32, PTPN22, GAS6, STAP1, GATA1, GATA2, GATA3, CLEC4E, BLOC1S6, GATA6, PLA2G2D, GBP1, KAT2A, GREM1, MSTN, GFER, GFI1, HAVCR1, GGT1, GGT3P, LAT, FOXP1, PRELID1, IL36B, C5AR2, SIT1, TNFRSF21, SMPDL3B, RABGEF1, STK39, GLI2, GLI3, GPI, GPLD1, IFNL2, IFNL3, IFNL1, CCDC88B, CXCR3, IGHV7-81, IGHV6-1, IGHV5-10-1, IGHV5-51 IGHV4-61, IGHV4-59, IGHV4-39, IGHV4-34, IGHV4-31 ANGPT1, IGHV4-28, IGHV4-4, MILR1, IGHV3-74, IGHV3-73, GPR18, IGHV3-72, TMEM102, IGHV3-66, IGHV3-64, LGALS9B, IGHV3-53, IGHV3-49, IGHV3-48, IGHV3-43, IGHV3-38, HMSD, IGHV3-35, IGHV3-33, CXCL17, IGHV3-30, IGHV3-23, IGHV3-21, IGHV3-20, Tafa3, IGHV3-16, IGHV3-15, IGHV3-13, IGHV3-11 IGHV3-7, IGHV2-70, IGHV2-26, IGHV2-5, IGHV1-69-2,         </p> |

| Gene sets name | Gene                                                                                                                                                                                                                                                                                                                                                                                                                                                                                                                                                                                                                                                                                                                                                                                                                                                                                                                                                                                                                                                                                                                                                                                                                                                                                                                                                                                                                                                                                                                                                                                                                                                                                                                                                                                                                                                                                                                                                                                                                                                                                                                                                                                                                                                                                                                                                                                                                                                                                                                                                                                                                                                                                                                                                                                                                                                                                                                                                                                                                                                                               |
|----------------|------------------------------------------------------------------------------------------------------------------------------------------------------------------------------------------------------------------------------------------------------------------------------------------------------------------------------------------------------------------------------------------------------------------------------------------------------------------------------------------------------------------------------------------------------------------------------------------------------------------------------------------------------------------------------------------------------------------------------------------------------------------------------------------------------------------------------------------------------------------------------------------------------------------------------------------------------------------------------------------------------------------------------------------------------------------------------------------------------------------------------------------------------------------------------------------------------------------------------------------------------------------------------------------------------------------------------------------------------------------------------------------------------------------------------------------------------------------------------------------------------------------------------------------------------------------------------------------------------------------------------------------------------------------------------------------------------------------------------------------------------------------------------------------------------------------------------------------------------------------------------------------------------------------------------------------------------------------------------------------------------------------------------------------------------------------------------------------------------------------------------------------------------------------------------------------------------------------------------------------------------------------------------------------------------------------------------------------------------------------------------------------------------------------------------------------------------------------------------------------------------------------------------------------------------------------------------------------------------------------------------------------------------------------------------------------------------------------------------------------------------------------------------------------------------------------------------------------------------------------------------------------------------------------------------------------------------------------------------------------------------------------------------------------------------------------------------------|
|                | IGHV1-69, IGHV1-58, IGHV1-45, IGHV1-24, IGHV1-18 IGHV1-3, DLL1, GPER1, TRDC, GPR31, GPR32, GPR32P1, GPR33, TREML4, TRBC2, TRBC1, NLRP2B, FFAR3, FFAR2, GPS2, GPX1, IGLC7, TMEM176B, GRN, RGCC, PHPT1, DROSHA, PYCARD, TBK1, CD274, BLNK, ICOS, CNOT7, GPR171, UBQLN1, NOP53, TBX21, SH3KBP1, ANXA1, HCK, HCLS1, NCKAP1L, CFH, HFE, CFHR1, ADGRE2, CD209, HIF1A, UBE2K, STOML2, HK1, HLA-A, HLA-B, HLA-DMA, HLA-DMB, HLA-DOA, HLA-DOB, HLA-DPA1, HLA-DPB1, HLA-DQA1, HLA-DQA2, HLA-DQB1, HLA-DQB2, HLA-DRA, HLA-DRB1, HLA-DRB3, HLA-DRB4, HLA-DRB5, HLA-E, HLA-F, HLA-G, HLA-H, MR1, HLX, HMGB1, HMGB2, HMGB3, HMOX1, HOXA5, HOXA7, HOXA9, HOXB8, APCS, AIRE, HPX, HRAS, HRG, PRMT1, HES1, BIRC2, HSF1, BIRC3, HSPA1A, HSPA1B, XIAP, HSPA9, HSP90AA1, HSP90AB1, HSPD1, APOA1, APOA2, ICAM1, NLRP10, CLEC4D, RAB7B, HCAR2, CLEC4G, ID2, STING1, CFI, IFI16, IFI35, IFNA2, IFNB1, IRGM, IFNG, APOD, IGF1, APOE, IGF2, IGFBP2, IGHA1, IGHA2, IGHD, IGHE, IGHG1, IGHG2, IGHG3, IGHG4, IGHM, APP, IGKC, RAET1G, TICAM2, IGLC1, IGLC2, IGLC3, KLK3, IGLC6, IGLL1, IHH, IKBKB, IL1A, IL1B, IL1R1, IL2, IL2RA, IL4, IL4R, IL5, IL6, IL6R, IL6ST, IL7, IL7R, CXCL8, IL10, IL12A, IL12B, IL12RB1, IL13, IL13RA2, AQP3, IL15, IL15RA, IL17A, IL18, IDO1, INHA, INHBA, CXCL10, INS, INPP5D, IRAK1, IRAK2, IRF1, IRF3, IRF4, IRF7, ITGA2, ITGA4, ITGAM, ITGB2, EIF6, ITK, ITPKB, JAK2, JAK3, JUND, KARS1, NCR3LG1, TBC1D10C, MIA3, USP17L2, KCNN4, KIR2DL1, KIR2DL4, KIT, KLRC1, KLRC2, KLRC3, KLRD1, ARG1, ARG2, KRT1, RHOA, THEMIS, ILDR2, C10orf99, CLEC12B, IGHV1OR15-1, SCIMP, BLOC1S3, USP27X, LAG3, RHOG, LAMP1, LBP, LCK, LCP2, LDLR, LEP, LGALS1, LGALS3, LGALS9, LIF, LIMK1, RHOH, MYO18A, LMO1, LOX, PLPP6, LTA, ARNT, LTF, LYN, SH2D1A, MIR105-1, MIR125A, MIR125B1, MIR128-1, MIR130A, MIR136, MIR140, MIR142, MIR145, MIR146A, MIR17, MIR18A, MIR181B1, MIR181C, MIR185, MIR19A, MIR19B1, MIR21, MIR221, MIR222, MIR223, MIR24-1, MIR27A, MIR30B, MIR34A, MIR17HG, SMAD3, ARRB2, SMAD7, MBL2, CD46, DNAJB9, MDK, MEF2C, MEIS1, MEIS2, MAP3K1, MFAP4, KITLG, CD99, MICB, MIF, MITF, MLH1, MMP8, MMP12, MMP14, MNDA, MOG, CD200, MPL, MPP1, EIF2AK4, RHEX, NRARP, TARM1, MSH2, MSN, MYB, MYC, MYD88, NBL1, NCK1, ATM, NF1, NFATC2, NFE2L2, NFKBIA, NFKBIL1, NINJ1, NONO, NOS2, CNOT4, NPY, NOTCH2, CCN3, PNP, NPY5R, ROR2, OAS1, OAS3, ORM1, ORM2, P2RX4, P2RX7, FURIN, PLA2G3, SERPINE1, PAK1, IL20, PAK2, PAK3, PAWR, TRAT1, FOXP3, EXOSC3, ZBTB7B, PCK1, GAL, KMT5B, IRAK4, ZNF580, LEF1, CLDN18, MZB1, C1RL, TLR7, CD320, SLC15A3, TLR8, SPG21, PDCD1, PDE4B, SCARA3, PDE4D, YTHDF2, IL23A, CYRIB, KLF13, ENPP3, PDPK1, GPRC5B, CD244, ERAP1, PF4, CFP, PGC, PGF, PHB, SERPINB9, PIGR, PIK3CA, PIK3CB, PIK3CD, PIK3R1, PIP, PLA2G1B, PLA2G2A, PLA2G4A, PLA2G5, IL17D, UBASH3A, PLCG1, PLCG2, PLD2, PLSCR1, IL20RB, TLR9, TREM2, SIAE, SASH3, SHLD2, RC3H2, POU4F1, POU4F2, PAF1, PARP14, PPARG, P4HTM, MED1, BTN2A3P, OTUD4, TRPM4, LAX1, YTHDF1, LIME1, RNF125, TESC, PPP2R3C, BANK1, SUS4, RNF31, TAPBPL, AKIRIN2, PRMT6, RIF1, APPL2, TRIM62, PSPC1, FBXW7, PPP3CB, TMEM176A, |

| Gene sets name | Gene                                                                                                                                                                                                                                                                                                                                                                                                                                                                                                                                                                                                                                                                                                                                                                                                                                                                                                                                                                                                                                                                                                                                                                                                                                                                                                                                                                                                                                                                                                                                                                                                                                                                                                                                                                                                                                                                                                                                                                                                                                                                                                                                                                                                                                                                                                                                                                                                                                                                                                                                                                                                                                                                                                                                                                                                                                                                                                                                                                                                   |
|----------------|--------------------------------------------------------------------------------------------------------------------------------------------------------------------------------------------------------------------------------------------------------------------------------------------------------------------------------------------------------------------------------------------------------------------------------------------------------------------------------------------------------------------------------------------------------------------------------------------------------------------------------------------------------------------------------------------------------------------------------------------------------------------------------------------------------------------------------------------------------------------------------------------------------------------------------------------------------------------------------------------------------------------------------------------------------------------------------------------------------------------------------------------------------------------------------------------------------------------------------------------------------------------------------------------------------------------------------------------------------------------------------------------------------------------------------------------------------------------------------------------------------------------------------------------------------------------------------------------------------------------------------------------------------------------------------------------------------------------------------------------------------------------------------------------------------------------------------------------------------------------------------------------------------------------------------------------------------------------------------------------------------------------------------------------------------------------------------------------------------------------------------------------------------------------------------------------------------------------------------------------------------------------------------------------------------------------------------------------------------------------------------------------------------------------------------------------------------------------------------------------------------------------------------------------------------------------------------------------------------------------------------------------------------------------------------------------------------------------------------------------------------------------------------------------------------------------------------------------------------------------------------------------------------------------------------------------------------------------------------------------------------|
|                | <p>LGR4, SIRPG, H4C15, SMPD3, DDX60, AMBRA1, LYAR, NPLOC4, POLR3B, PRKAR1A, INAVA, PRKCA, PRKCB, PCID2, AXL, PRKCD, PRKCE, PAG1, SELENOS, PRKCH, PKN1, PRKCQ, PRKCZ, PRKDC, ERBIN, MAPK1, MAPK3, MAPK8, MAPK11, MAPK9, MAPK10, MAP2K6, MAP2K7, PRNP, BTNL2, CRTAM, AZGP1, METTL3, LGMN, CCL28, MASP1, KLK7, CYP26B1, PSEN1, B2M, PSG9, PSMA1, IFNK, SLAMF8, GPR137, SPHK2, TCIM, PSMB4, GPR108, SPPL2B, DUSP22, HMCES, CTNNBIP1, TWSG1, ENTPD7, PITHD1, C12orf4, CAMK1D, CD177, RTN4, PELI1, ZNFX1, ZMIZ1, SLC39A10, BAD, PTAFR, IGHV7-4-1 PTGER4, S100A14, MIR520E, MIR520B, PTK2, MAVS, MTUS1, WDFY1, SH3RF1, PTN, USP29, GPAM, PTPN1, PTPN2, EPG5, PTPN6, PTPN11, HAMP, ZP4, SLC46A2, PTPRC, PTPRD, PTPRJ, PTPRS, BAX, PURB, PVR, NECTIN2, NLRC4, JAM2, CACTIN, SELENOK, RAC1, RAC2, RAG1, RAG2, IL21, RARA, RARG, RARRES2, RB1, PLEKHA1, TRPV4, RBP4, BCL2, RELA, TRIM27, FAM3A, BCL6, SMAP1, RORA, BCR, RPS3, RPS6KA3, RPS19, BDKRB1, S100A7, CFB, SERPINB4, BGLAP, CEACAM1, CCL1, CCL2, CCL3, CCL4, CCL5, CCL7, CCL8, CCL19, CCL20, CCL21, CCL24, CCL25, CXCL6, XCL1, CX3CL1, SDC4, CXCL12, PRDM1, GPATCH3, ZNF335, GPSM3, SEC14L1, BLK, MYO1G, SELE, SELP, SAMSN1, CRLF2, VSIR, NOD2, IFIH1, MAP2K4, CARD9, SFPQ, SFRP1, NFKBIZ, SFTPD, CLEC7A, PLA2G2F, SHH, PRSS56, RBM15, P2RY12, ST3GAL4, MARCHF7, LRRC19, RASAL3, SLAMF1, WNK1, BMP4, BMP5, NCF1, LGALS7B, SLC7A1, LGALS9C, SLC11A1, SLC15A2, BMX, POLR3D, SNCA, SOD1, SOS1, SOS2, SOX4, SOX9, SOX11, SOX12, SPI1, SPN, SPTA1, BPI, SRC, TRIM21, ZFP36L1, STAT1, STAT2, STAT3, STAT5B, STAT6, ZFP36L2, STK10, STK11, STX4, STXBP1, STXBP2, BST1, SUPT6H, BST2, VAMP7, XCL2, SYK, ADAM17, TACR1, MAP3K7, TAL1, TAPBP, TCF7, ZEB1, BTK, BTN1A1, TCTA, PRDX2, TEC, TMBIM6, TFE3, TFRC, TGFB1, TGFB2, TGFB3, TGFB2, THBS1, THBS4, THPO, THY1, KLF10, C1QBP, TLR1, TLR2, TLR3, TLR4, SERPING1, TLR5, TSPAN6, GPR137B, C1QA, TNF, TNFAIP3, C1QB, TNFAIP6, TNFRSF1B, C1QC, C1R, TP53BP1, C1S, C2, C3, TRAF2, TRAF3, TRAF6, C3AR1, C4A, C4B, C4BPA, C4BPB, C5, C5AR1, GGT2, C6, TNFSF4, CCR2, TNFRSF4, TXK, TYK2, C7, TYRO3, ACOD1, TYROBP, C8A, C8B, C8G, UBE2N, C9, UFD1, SCGB1A1, NR1H2, VAV1, VAV2, VCAM1, VEGFA, VEGFB, VEGFC, EZR, WAS, LAT2, NSD2, WNT5A, XBP1, XG, XRCC5, YES1, ZAP70, ZFP36, ZNF16, ZBTB16, TRIM25, ZP3, LRP8, LAPTM5, CACNB3, FZD5, MAPKAPK3, COLEC11, CUEDC2, PVRI, DHX58, MMP28, TNIP2, BAG6, LST1, PLA2G7, NKAP, CDC73, MUL1, TNFAIP8L2, AKIRIN1, RHBDF2, NLRX1, VTCN1, RIN3, BTNL8, ATAD5, TNIP3, SLC8B1, NR4A3, ZC3H12A, ALPK1, TASL, PDGFD, WDR61, PDCD1LG2, CD276, NDFIP1, ZBP1, COLEC12, CALR, GPR68, CAMK4, SLC7A5, CFHR5, DCSTAMP, FBXO38, CLPB, UNC93B1, DOCK8, MADCAM1, TLR10, TRIM56, H4C9, KLRC4, GF1B, PLVAP, H4C1, CASP3, H4C4, H4C6, H4C12, H4C11, H4C3, H4C8, H4C2, PARP9, H4C5, H4C13, CD99L2, H4C14, JAM3, ITCH, MAD1L1, CASP6, PLA2G6, PLA2G10, CASP8, PRAM1, NLRC5, STX7, SLA2, RNF135, PRXL2A, NCK2, CARD11, CUL4A, ZC3H8, FOXN1, TTBK1, LOXL3, KMT5C, NFKBID, SEMA7A, ADTRP, HAVCR2, SPPL2A,</p> |

| Gene sets name        | Gene                                                                                                                                                                                                                                                                                                                                                                                                                                                                                                                                                                                                                                                                                                                                                                                                                                                                                                                                                                                                                                                                                                                                                                                                                                                                                                                                                                                                                                                                                                                                                                                                                                                                                                                                                                                                                                                                                                                                                                                                                                                                                                                                                                                                                                                                                                                                                                                                                                                                                                                                                                                                                                                                                                                                                                                                                                                                                                                                                                                                                   |
|-----------------------|------------------------------------------------------------------------------------------------------------------------------------------------------------------------------------------------------------------------------------------------------------------------------------------------------------------------------------------------------------------------------------------------------------------------------------------------------------------------------------------------------------------------------------------------------------------------------------------------------------------------------------------------------------------------------------------------------------------------------------------------------------------------------------------------------------------------------------------------------------------------------------------------------------------------------------------------------------------------------------------------------------------------------------------------------------------------------------------------------------------------------------------------------------------------------------------------------------------------------------------------------------------------------------------------------------------------------------------------------------------------------------------------------------------------------------------------------------------------------------------------------------------------------------------------------------------------------------------------------------------------------------------------------------------------------------------------------------------------------------------------------------------------------------------------------------------------------------------------------------------------------------------------------------------------------------------------------------------------------------------------------------------------------------------------------------------------------------------------------------------------------------------------------------------------------------------------------------------------------------------------------------------------------------------------------------------------------------------------------------------------------------------------------------------------------------------------------------------------------------------------------------------------------------------------------------------------------------------------------------------------------------------------------------------------------------------------------------------------------------------------------------------------------------------------------------------------------------------------------------------------------------------------------------------------------------------------------------------------------------------------------------------------|
| IMMUNE SYSTEM PROCESS | <p>UBASH3B, IKBKG, DGKZ, CST7, TRIM5, ZCCHC3, AP3B1, FCN3, SCIN, TSLP, CAV1, TNFSF11, RUNX1, SKAP1, OASL, RUNX3, CBF3, SOCS1, PDE5A, IRS2, VAMP8, CBLB, SNX4, RIPK1, TNFSF14, TNFSF13, TNFSF9, TNFRSF14, RIPK2, FADD, RIOK3, TNFRSF18, IL1RL2, IL18R1, BANF1, CD84, LDB1, VNN1, SPHK1, EIF2B4, EIF2B3, EIF2B2, EIF2B5, BCL10, RAB29, AP3D1, WASL, WNT3A, KLHL6, TRIM15, PGLYRP1, TNFSF18, OTULIN, DCAF15, MCU, IL33, CD1A, SART1, DNAJA3, TRIM41, ACVR1B, CD1B, FCGR2C, CD1C, NMI, CD1D, CD1E, CD2, RNF185, RSAD2, CD3E, IL1RL1, DDX21, CD247, ACVR2A, CD4, CD5, CD5L, CD6, DLG5, CD8A, MFHAS1, CD8B, MAPKAPK2, TIFA, CD8B2, BPIFB1, CD9, CD14, GPR55, CD19, SOCS6, CD83, MS4A1, CD22, VAMP3, SLIT2, ADIPOQ, CD27, SLC22A13, CLEC6A, CD28, LPXN, CD80, CD86, CHST2, NCR1, TNFSF8, AIM2, CD33, IL27RA, THEMIS2, ATG5, MAPK8IP1, CD36, CD38, BCAR1, NR1D1, CD40, SOX13, CD40LG, CARTPT, CD47, CD48, ISG15, IKBKE, CTR9, SOCS5, CD59, CD68, N4BP1, LRRC14, PUM1, CD70, CD74, CD79A, CD79B, CD81, RIPOR2, TOX, RASSF2, MATR3, TESPA1, GAB2, TRIL, PJA2, TOMM70, MAFB, OXSR1, USP15, NR1H4, THOC1</p> <p>ACIN1, ACVR1B, ACVR2A, AIM2, AKT1, ALAS2, ANXA11, APLN, APOA1, APOA2, APOA4, APOBEC3F, APOBEC3G, AQP9, ARHGDI1B, ATP6V0A2, AZU1, BCAR1, BCGF1, BCL10, BCL2, BLNK, BNIP3, BNIP3L, BST1, BST2, C15orf31, C1QBP, C2, C5AR1, CADM1, CALCA, CARTPT, CCBP2, CCL18, CCL19, CCL2, CCL20, CCL21, CCL22, CCL23, CCL24, CCL25, CCL26, CCL27, CCL4, CCL5, CCR1, CCR2, CCR4, CCR5, CCR6, CCR8, CCR9, CCRL1, CD164, CD1D, CD2, CD22, CD24, CD274, CD276, CD28, CD34, CD3D, CD3E, CD4, CD40LG, CD47, CD7, CD74, CD79A, CD79B, CD83, CD86, CD96, CD97, CDC42, CDK6, CEACAM8, CEBPB, CEBPG, CFHR1, CHST4, CHUK, CIITA, CKLF, CLEC7A, CMKLR1, CNIH, CNR2, COLEC12, CRHR1, CRTAM, CSF1, CST7, CTLA4, CTSC, CTSE, CTSG, CTSS, CTSW, CX3CL1, CXCL12, CXCL13, CXCR4, DEFA1, DEFB1, DEFB103A, DEFB118, DEFB127, DEFB4, DMBT1, DOCK2, DPP4, DPP8, DYRK3, EBI2, EBI3, EDG6, ELF4, ERAP2, EREG, ETS1, FCAR, FCGR1A, FCGR2B, FCGR3A, FCGR3B, FCGRT, FCN1, FCN2, FOXO3, FOXP3, FTH1, FYB, FYN, GBP2, GEM, GLMN, GPI, GPR44, GPR65, GTPBP1, GZMA, HAMP, HCLS1, HDAC4, HDAC5, HDAC7A, HDAC9, HELLS, HLA-DRB3, HRH2, ICOSLG, IFI16, IFI6, IFITM2, IFITM3, IFNK, IGSF6, IK, IKBKAP, IKBKG, IL10, IL10RB, IL12A, IL12B, IL15, IL16, IL17A, IL17B, IL18, IL18BP, IL1R2, IL2, IL21, IL27, IL27RA, IL28RA, IL29, IL2RA, IL2RG, IL31RA, IL32, IL4, IL4R, IL6, IL6R, IL6ST, IL7, IL7R, IL8, IL8RB, INHA, INHBA, INS, IRF8, ITGB2, JAG2, KIR2DL1, KIR2DL3, KIRREL3, KRT1, LAT, LAT2, LAX1, LCK, LCP2, LDB1, LIG1, LIG3, LILRB2, LRMP, LST1, LTB4R, LTF, LY75, LY86, LYN, MADCAM1, MAFB, MAL, MALT1, MAP3K7, MAP4K1, MAP4K2, MBL2, MBP, MIA3, MLF1, MLL, MMP9, MNX1, MR1, MS4A1, MS4A2, MYH9, MYST1, MYST3, NCF4, NCK1, NCK2, NCOA6, NCR1, NFAM1, NFIL3, NHEJ1, NLRC3, NOTCH2, NOTCH4, ODZ1, OPRD1, OPRK1, PAX5, PDCD1, PF4, POU2AF1, POU2F2, PRELID1, PREX1, PRG3, PRKRA, PRL, PSMB10, PTAFR, PTGER4, PTPRC, PYDC1, RAB3D, RAG1, RASGRP4, RFX1, RGS1,</p> |

| Gene sets name | Gene                                                                                                                                                                                                                                                                                                                                                                                                                                                                                                                                                                                                                                                                                                                                                                                                                                                                                                                                                                                                                                                                                                                                                                                                                                                                                                                                                                                                                                                                                                                                                                                                                                                                                                                                                                                                                    |
|----------------|-------------------------------------------------------------------------------------------------------------------------------------------------------------------------------------------------------------------------------------------------------------------------------------------------------------------------------------------------------------------------------------------------------------------------------------------------------------------------------------------------------------------------------------------------------------------------------------------------------------------------------------------------------------------------------------------------------------------------------------------------------------------------------------------------------------------------------------------------------------------------------------------------------------------------------------------------------------------------------------------------------------------------------------------------------------------------------------------------------------------------------------------------------------------------------------------------------------------------------------------------------------------------------------------------------------------------------------------------------------------------------------------------------------------------------------------------------------------------------------------------------------------------------------------------------------------------------------------------------------------------------------------------------------------------------------------------------------------------------------------------------------------------------------------------------------------------|
| MODULE 169     | RPS19, RSAD2, RUNX1, SAA1, SART1, SCG2, SCIN, SCYE1, SECTM1, SEMA3C, SEMA4D, SEMA7A, SFTPD, SIRPG, SIT1, SKAP1, SLA2, SNRK, SOCS5, SOD1, SP2, SPACA3, SPI1, SPINK5, ST6GAL1, SYK, TAPBP, TARBP2, TAZ, TBX1, TCF12, TCF7, TGFB1, TGFB2, THY1, TLR4, TLR7, TLR8, TM7SF4, TNFAIP1, TNFRSF14, TNFRSF4, TNFSF13, TPD52, TRAF2, TRAF6, TRAT1, TREM1, TREM2, TRIM22, UBE2N, VIPR1, VTN, WAS, XBP1, YTHDF2, ZAP70, ZBTB16, ZEB1, ZNF675<br>ADA, DHRS9, CDK6, CLGN, STAG3, RIPK3, CR2, CRIP2, CYBB, DAPK1, AGA, DTX1, DUSP2, AHR, DENND3, KLRK1, NPIP3, FOS, HEATR5A, KAT2A, ATP2C1, GNG10, TRIB2, H1-2, HCK, HLA-DOA, HTR3A, ID2, IL2RB, IL7R, IL15RA, ITGA4, ITGB2, JUP, KCNJ5, STMN1, LMO2, SMAD7, MAL, MME, ABCC1, MT2A, MYBL1, PCDHGC3, SERPINA5, CRLF3, SCAND2P, LINC01949, PRKAR2B, PAG1, PSMB8, RGL3, SLC39A10, TP73-AS1, AICDA, ZNF608, STIM2, BCL2A1, RGS1, RGS13, RGS16, BCL6, BCL7A, SCD, CCL3, CCL4, CCL5, XCL1, BIK, TNS3, SLC2A5, BMP7, SON, SORL1, KLF10, TSPAN7, TXN, ZNF16, CACNA1A, DDA1, TNFAIP8L2, ASB13, SVEP1, CAMK4, ULK1, CREG1, IER3, KLHL6, USP2, CD2, CD3D, IL32, STK17A, CD86, ISG15, MICAL2, TOX<br>CDH13, LPAR6, DLC1, IFITM3, IFI30, CEBPD, GNLY, IFITM2, CXCR6, NXPH3, DCTN3, MGLL, KCTD12, CCR1, CCR2, CCR5, EARS2, CPM, CSF1R, CTSB, CTSL, CYBB, CYP1B1, CYP27A1, DAB2, DAPK1, DES, AIF1, A2M, FAP, FCER1G, FCGR1A, FCGR2A, FN1, SRRM2, FPR1, FTH1, FTL, GAS6, GBP1, GBP2, GJB1, GPX1, GZMK, HBA2, HLA-DOA, CCN1, IL1R1, IL2RB, IL3RA, ITGB2, ITGB5, LAG3, FADS1, LMO2, LYZ, CXCL9, MMP1, MMP2, MMP9, MYLK, PCDH9, PDGFRA, PDGFRB, TBC1D8B, LGMN, BBS2, S100A4, MAPK12, CCL2, CCL5, CCL11, CCL14, CCL18, CCL21, CXCL12, SPARC, THBS1, TIMP1, TIMP2, TIMP3, TNFAIP6, C3AR1, TYROBP, VCAM1, VIM, VWF APOL3, VMP1, ZNF347, IFITM1, PLPP3, TNFSF13, TNFSF10, IER3, CCND2, IL32, CD14, CD63, CD151 |
| MODULE 170     | ADA, LANCL1, SEC61B, LILRA1, CPM, CYP27B1, SMPX, GRK6, HLA-DOA, HLX, IL7R, IL15RA, ITGB3, LAG3, LGALS3, LIMK2, LSS, NFKB2, NINJ1, NPPB, TIMMDC1, CTTNBP2NL, DNAJC3, GRAMD1A, PTPN1, PTPN2, RELB, SLAMF1, TGFA, TXN, SPSB1, MIR22HG, DENR, TRIP10                                                                                                                                                                                                                                                                                                                                                                                                                                                                                                                                                                                                                                                                                                                                                                                                                                                                                                                                                                                                                                                                                                                                                                                                                                                                                                                                                                                                                                                                                                                                                                        |
| MODULE 522     | ADA, NAMPT, GLYAT, CDKN1A, IGSF6, LILRB2, IFITM3, SEMA4D, SEMA3C, CEBPE, UBD, BATF, IFI44, CXCL13, GNLY, IFITM2, SH2B2, CES1, KLRA1P, CTSC, CCR9, LILRB1, CD300C, LILRB5, LILRB4, IL24, LILRA1, LILRB3, LILRA2, CHIT1, CHRM3, TIRAP, CLC, CLU, CCR1, CCR2, CCR5, CNR2, KLF6, MAP3K8, ADM, ADORA2A, CR1, CR2, CRIP1, CSF1, CSF2RB, CSF3, CSF3R, CSR2, CCN2, ADRA2A, CTSG, CTSS, CX3CR1, CYBB, DAB2, CD55, DAPK1, DEFA5, DEFB1, DEFB4A, NQO1, DPP4, AGRP, HBEGF, GPR183, EDN1, EDNRA, EGF, AHR, EGR4, EPHA2, AIF1, EMP1, EMP2, EMP3, ENDOG, ENPEP, EPHX1, EPHX2, EPS8, ERBB2, EREG, ERG, ETS1, EVI2A, ALCAM, F2, F3, F8, FCER1A, MS4A2, FCER1G, FCGR2A, FCGR3A, FCGR3B, FCGRT, FCN1, FCN2, FGA, FGB, FGF6, FGF7, FGG, FGR, KLRK1, FLT3, FN1, TNFRSF13B, IFIT5, FYB1, FYN, GAS6, GATA3, GBP1, GBP2, GBX2, GCG, GEM,                                                                                                                                                                                                                                                                                                                                                                                                                                                                                                                                                                                                                                                                                                                                                                                                                                                                                                                                                                                                        |
| MODULE 75      |                                                                                                                                                                                                                                                                                                                                                                                                                                                                                                                                                                                                                                                                                                                                                                                                                                                                                                                                                                                                                                                                                                                                                                                                                                                                                                                                                                                                                                                                                                                                                                                                                                                                                                                                                                                                                         |

| Gene sets name | Gene                                                                                                                                                                                                                                                                                                                                                                                                                                                                                                                                                                                                                                                                                                                                                                                                                                                                                                                                                                                                                                                                                                                                                                                                                                                                                                                                                                                                                                                                                                                                                                                                                                                                                                                                                                                                                                                                                                                                                                                                                                                                                                                                                                                                                                                                                                                                                                                                                                                                                                                                                                                                                                                                                                                                                                                                                                                                       |
|----------------|----------------------------------------------------------------------------------------------------------------------------------------------------------------------------------------------------------------------------------------------------------------------------------------------------------------------------------------------------------------------------------------------------------------------------------------------------------------------------------------------------------------------------------------------------------------------------------------------------------------------------------------------------------------------------------------------------------------------------------------------------------------------------------------------------------------------------------------------------------------------------------------------------------------------------------------------------------------------------------------------------------------------------------------------------------------------------------------------------------------------------------------------------------------------------------------------------------------------------------------------------------------------------------------------------------------------------------------------------------------------------------------------------------------------------------------------------------------------------------------------------------------------------------------------------------------------------------------------------------------------------------------------------------------------------------------------------------------------------------------------------------------------------------------------------------------------------------------------------------------------------------------------------------------------------------------------------------------------------------------------------------------------------------------------------------------------------------------------------------------------------------------------------------------------------------------------------------------------------------------------------------------------------------------------------------------------------------------------------------------------------------------------------------------------------------------------------------------------------------------------------------------------------------------------------------------------------------------------------------------------------------------------------------------------------------------------------------------------------------------------------------------------------------------------------------------------------------------------------------------------------|
| MODULE 223     | <p>LAT, LAMP3, SFN, GPX1, GPX2, GPX3, GRN, CXCL1, CXCL2, GSTA3, GZMA, H1-2, CFH, HFE, CFHR1, HLA-A, HLA-B, HLA-C, HLA-DMB, HLA-DOA, HLA-DRA, HLA-DRB5, HLA-F, HLA-G, HP, AIRE, IRF8, CFI, IFI27, IFIT1, IFNGR1, IGF1, APOE, IGF2, CCN1, IGLL1, FAS, IL1A, IL1B, IL1R1, IL1RAP, FASLG, IL2RB, IL2RG, IL3RA, IL4R, IL6, IL6R, IL6ST, IL7R, CXCL8, IL9, CXCR2, IL11, IL15, IL15RA, IL16, IL18, CXCL10, INSIG1, IRF1, AQP9, IRF7, ISG20, ITGB2, ITK, AREG, KCNN4, KIR2DL4, KIR3DL1, KLRC1, LBP, LCK, LCP2, LGALS3BP, ARHGDI, LIF, LRP1, LSP1, LTA, LTB, LTBR, LTF, LY6E, LY6H, SH2D1A, TACSTD2, MXD1, MDK, MGST2, MGST3, CXCL9, MNDA, MPO, MST1R, MTHFR, MX1, MX2, MYC, MYLK, NAB2, NCF1C, NCF2, NCF4, NFKBIA, NPY, NPY1R, NR4A2, OAS1, ORM1, ORM2, OSM, PAX5, PDCD1, PDGFA, PDGFB, PDGFRA, SERPINF1, PF4, CFP, PPBP, PRF1, PRG2, DNAJC3, AZGP1, B2M, PYY, PSMB9, PTAFR, PTGER4, PTMS, PTN, BCAT1, RAG1, REG1B, GRK1, RNASE6, BCL6, S100B, SAA1, CFB, CEACAM1, CCL1, CCL2, CCL3, CCL4, CCL7, CCL8, CCL11, CCL13, CCL14, CCL15, CCL17, CCL18, CCL19, CCL20, CCL21, CCL23, CXCL6, CXCL11, CXCL5, XCL1, CX3CL1, CXCL12, SELL, SELP, SELENOP, SFTPD, ST6GAL1, SLAMF1, SPOCK1, BPI, STAT1, STAT3, STAT5A, ZFP36L2, BST1, BST2, ZEB1, BTG1, TEK, TFF1, TFF3, TGFA, TGFBI, THPO, TIMP1, TLR1, TLR2, SERPING1, C1QA, C1R, C1S, C2, TPSAB1, C3, C3AR1, C4B, C4BPA, C4BPB, C5, C5AR1, C6, C7, TYROBP, C8A, C8B, C8G, C9, UMOD, VIPR1, VTN, BTG2, CXCR4, LST1, MIA, CAMP, CAPG, SNN, MAD1L1, DYRK3, GPR65, GALR3, IFITM1, CST7, TNFSF11, SKAP1, OASL, RUNX3, AKR1C3, TNFSF14, TNFSF12, TNFSF10, PSPHP1, CREG1, IL18R1, NRP1, CDK5R1, P4HA2, PGLYRP1, PSTPIP1, CD1C, CD2, CD3D, CD3G, OSMR, CD247, CD4, CD5, CD5L, CD6, CRLF1, CD8A, CD8B, CD14, CD19, CD83, MS4A1, CD22, CD24, CD27, CD101, CD86, AIM2, LY86, IL27RA, GMFG, CXCL14 CD48, CD53, ISG15, CD59, CD69, CD72, CD79A, CD79B, CD81, CLEC2B</p> <p>TSPAN3, NAMPT, LILRB5, LILRB4, LILRA1, LILRB3, LILRA2, UBE2C, CHRM3, KLF6, CRIP1, CSF1, CSF3, CSF3R, ADRA1D, CSRP2, DAB2, DEFA5, HBEGF, EDN1, EDNRA, EGF, EMP1, EMP2, EMP3, ENPEP, EPS8, ERBB2, EREG, EVI2A, FGA, FGB, FGF4, FGG, FTH1, GAS6, GCG, LAMP3, SFN, GRN, CXCL1, GRPR, HFE, HLA-A, HLA-B, HLA-C, HLA-DMB, HLA-DOA, HLA-DRA, HLA-DRB5, HLA-F, HLA-G, HP, IGF1, IGF2, CCN1, IL1A, IL1B, IL2RG, IL3, IL6, IL6R, IL15, IL15RA, IL18, CXCL10, INSIG1, IRAK1, ISG20, AREG, KCNN4, LIF, LRP1, LRPAP1, LY6E, TACSTD2, MXD1, MDK, MST1R, MTHFR, MYC, NAB2, NCF4, OSM, PRDX1, PDGFA, PDGFB, PDGFRA, SERPINF1, PPBP, DNAJC3, B2M, PTN, BCAT1, REG1B, RNASE6, BCL6, RPS4X, RPS27, S100B, CCL14, CXCL5, SELL, SELP, SHC1, SLAMF1, SPOCK1, ZFP36L2, BST2, ZEB1, BTG1, TFF3, TGFA, TGFBI, TIMP1, TLR1, TPSAB1, VIPR1, FOSL1, CAPN1, RUNX3, AKR1C3, TNFSF9, PSPHP1, CREG1, NRP1, CDK5R1, P4HA2, CD2, OSMR, CD4, CD5, CD8A, CD8B, CD83, CD86, LY86, BCAR1, CD48, CD69, CD79A, CD81</p> |
| MODULE 33      | <p>ARL4A, PDZK1IP1, LPCAT3, MSLN, DCAF7, TCIRG1, MYL9, ADARB1, MERTK, CLEC10A, KAT5, P3H4, PMVK, KLF1, ME3, LMAN2,</p>                                                                                                                                                                                                                                                                                                                                                                                                                                                                                                                                                                                                                                                                                                                                                                                                                                                                                                                                                                                                                                                                                                                                                                                                                                                                                                                                                                                                                                                                                                                                                                                                                                                                                                                                                                                                                                                                                                                                                                                                                                                                                                                                                                                                                                                                                                                                                                                                                                                                                                                                                                                                                                                                                                                                                     |

| Gene sets name | Gene                                                                                                                                                                                                                                                                                                                                                                                                                                                                                                                                                                                                                                                                                                                                                                                                                                                                                                                                                                                                                                                                                                                                                                                                                                                                                                                                                                                                                                                                                                                                                                                                                                                                                                                                                                                                                                                                                                                                                                                                                                                                                                                                                                                                                                                                                                                                                                                                                                                                                                                                                                                                                                                                                                                                                                                                                                                                                                                                                                             |
|----------------|----------------------------------------------------------------------------------------------------------------------------------------------------------------------------------------------------------------------------------------------------------------------------------------------------------------------------------------------------------------------------------------------------------------------------------------------------------------------------------------------------------------------------------------------------------------------------------------------------------------------------------------------------------------------------------------------------------------------------------------------------------------------------------------------------------------------------------------------------------------------------------------------------------------------------------------------------------------------------------------------------------------------------------------------------------------------------------------------------------------------------------------------------------------------------------------------------------------------------------------------------------------------------------------------------------------------------------------------------------------------------------------------------------------------------------------------------------------------------------------------------------------------------------------------------------------------------------------------------------------------------------------------------------------------------------------------------------------------------------------------------------------------------------------------------------------------------------------------------------------------------------------------------------------------------------------------------------------------------------------------------------------------------------------------------------------------------------------------------------------------------------------------------------------------------------------------------------------------------------------------------------------------------------------------------------------------------------------------------------------------------------------------------------------------------------------------------------------------------------------------------------------------------------------------------------------------------------------------------------------------------------------------------------------------------------------------------------------------------------------------------------------------------------------------------------------------------------------------------------------------------------------------------------------------------------------------------------------------------------|
| MODULE 345     | <p>MLLT11, ADIRF, SDS, LILRB4, TMSB15A, CHGA, CDC42EP1, CORO1A, CHIT1, CHKA, PRR4, KLHDC3, ADCYAP1R1, CLC, ADH1A, CNR2, COL6A1, COMP, ADM, COX7A1, CPA1, CPD, CR2, ATF2, CRYM, CSH2, CSRP2, CTSH, CTSL, CYBB, DEFB4A, CFD, DNM1, DRP2, DSG2, DTYMK, DUSP4, EPHA2, ELF3, ELF4, ELN, EMP1, EPAS1, EPB42, EPHA4, EPOR, ERBB2, ERF, ESRRA, ETS1, EVPL, FAAH, FABP4, FAT1, FBLN2, FCN1, FGFR4, FKBP1B, POMZP3, STAB1, ARC, MMD, PRAME, MAPK8IP2, FOSL2, ABCA4, ALOX15, FRZB, FUT4, FYB1, GABRB1, GATA2, GCH1, GCNT1, GHRHR, GJA1, GJB1, DMAC2L, BBC3, GLI1, GLI2, GLRA2, ANK1, GPT, GPX2, TRIB2, GRIK1, ANPEP, GSTM5, GUCY1B1, CCDC106, HAL, HBB, HCK, CFHR1, NRG1, HK2, ZBTB48, HMGCS1, HOXA4, APBA2, HOXB7, HSPG2, HTR3A, ID4, IFIT1, IGFBP6, IL1R1, INHA, CXCL10, INPP1, INPP5A, ITGA6, IRS1, ITGA5, ITGB7, ITIH1, ITPKB, JAK3, KCNH2, KCNMB1, KCNQ2, KIR2DL4, KIT, KRTAP5-9, KRT4, KRT5, KRT7, KRT8, KRT13, KRT18, KRT81, LAD1, LGALS3BP, ARHGDIG, LIPA, LNPEP, LRP1, LSP1, LTB, LTBP1, MARCKS, SMAD3, STS, MAN2A2, MAOA, MAT1A, ART3, BORCS8-MEF2B, MEST, MFAP2, ASAH1, MKI67, KMT2A, FOXO4, MMP1, MMP9, ASPH, ASS1, MUC1, MX1, MYH2, MYH7, MYL1, MYL2, MYL4, MYOG, NAB2, NEB, NF2, NFIX, NFKBIL1, NGF, NKX3-1, NOS1, FXYD2, NPAS1, ACR, NTN3, NTSR1, GPR143, OPRK1, FURIN, PAFAH1B3, PBX2, PCOLCE, PDCD1, WT1-AS, PDGFRA, ENPP2, PF4, PFKFB3, PFN2, SERPINB9, PKD1, PLCB3, PLOD2, PLXNB1, PRRX1, ACP5, PON2, POU3F1, KIF1A, PPBP, PPOX, PPP5C, PRB4, MAPK4, MAPK7, MAPK11, MAPK10, AZGP1, LGMN, PRSS8, KLK6, PSG6, PTAFR, PTH1R, PTK7, PTMS, PTN, PTPN3, PTPRH, PTPRS, PTX3, ARHGAP22, RAC2, RAD9A, ACTA2, RAPSN, RBMY1A1, PRPH2, RFC2, RGS3, BCL6, RORA, RPS4Y1, RPS6KA2, RRM2, RXRA, RXRG, S100A3, MAPK12, SCN4A, SCNN1A, SCNN1B, CEACAM1, CCL5, CCL17, CCL20, CCL21, CCL23, BIK, CXCL12, SECTM1, BLK, SELL, BLM, SELENOP, SGCA, SHMT1, ST3GAL4, PMEL, SLC1A6, SLC12A4, SLC19A1, SLC20A1, SLPI, SOD2, SOD3, SPARC, SPOCK1, SPRR1B, BPI, ZFP36L2, TAGLN, SERPINA7, TCEA2, HNF1A, TCN2, TEAD4, TESK1, TFF1, TFF3, TGM3, THBS1, THRA, NKX2-1, TK2, TLE1, TLE3, TSPAN7, CLDN5, TNFAIP2, TNFAIP6, TNFRSF1A, TNNI1, TNNT1, TNNT3, TPBG, TPM2, TPSAB1, C3, C3AR1, PHLDA2, C5AR1, C7, C8B, UBE2H, UCHL1, UGT8, UCK2, VWF, XK, CACNA2D1, CACNB3, CACNG1, LST1, CALD1, TCL1A, NPRL3, CAMP, CAPG, KDM5D, H2AC6, CNTNAP1, KCNAB2, TMEFF1, LY6D, RUNX1, AKR1C3, HRK, KYAT1, HCAR3, CCNA1, CCNE1, MAP7, SLC7A6, CD1C, SLC28A1, CD247, CD6, RAB11B, CD9, KLF4, CD24, EFTUD2, CD27, AKAP6, CD36, SPTLC2, GDF15, TP53I11, GTPBP1, AKAP12, RIN1, FEZ1, KIAA0040, CD70, CD79B, RIMS3, SPOCK2, DELE1, ELMO1, WASHC5, P2RY14, CLEC2B</p> <p>LPAR6, IFITM3, UNC13B, CEBPD, IFI44, GNLY, IFI44L, MST1L, CARD16, KCTD12, UNC5D, CSF3, CTSL, CYP1B1, DEFA1, KLRK1, FPR1, TXLNGY, CNRIP1, PPP1R16B, TTC30A, GBP1, GBP2, FOXP1, CACNG4, P2RY10, IGLJ3, GSTM2, BLNK, HBA2, ADGRE2, HLA-A, HLA-C, HLA-DMA, HLA-DMB, HLA-DPA1, HLA-DPB1, HLA-DQA1, HLA-DQB1, HLA-DRA, IFI27, IFI35, IFIT1, IGHG3, IGHM,</p> |

| Gene sets name | Gene                                                                                                                                                                                                                                                                                                                                                                                                                                                                                                                                                                                                                                                                                                                                                                                                                                                                                                                                                                                                                                                                                                                                                                                                                                                                                                                                                                                                                                                                                                                                                                                                                                                                                                                                                                                                                                                                                                                                                                                                                                                                                                                                                                                                                                                                                                                                                                                                                                                                                                                                                                                                                                                                                                                                                                                                                                                                                                                                             |
|----------------|--------------------------------------------------------------------------------------------------------------------------------------------------------------------------------------------------------------------------------------------------------------------------------------------------------------------------------------------------------------------------------------------------------------------------------------------------------------------------------------------------------------------------------------------------------------------------------------------------------------------------------------------------------------------------------------------------------------------------------------------------------------------------------------------------------------------------------------------------------------------------------------------------------------------------------------------------------------------------------------------------------------------------------------------------------------------------------------------------------------------------------------------------------------------------------------------------------------------------------------------------------------------------------------------------------------------------------------------------------------------------------------------------------------------------------------------------------------------------------------------------------------------------------------------------------------------------------------------------------------------------------------------------------------------------------------------------------------------------------------------------------------------------------------------------------------------------------------------------------------------------------------------------------------------------------------------------------------------------------------------------------------------------------------------------------------------------------------------------------------------------------------------------------------------------------------------------------------------------------------------------------------------------------------------------------------------------------------------------------------------------------------------------------------------------------------------------------------------------------------------------------------------------------------------------------------------------------------------------------------------------------------------------------------------------------------------------------------------------------------------------------------------------------------------------------------------------------------------------------------------------------------------------------------------------------------------------|
| MODULE 84      | <p>IGKC, IGLL1, IL2RB, IL3RA, IL7R, AQP9, LGALS3BP, FADS1, MAL, MECP2, CXCL9, MX1, ATP2A3, OAS1, OAS3, SERPINA5, TREM1, POU2F2, PARP14, BANK1, RNF31, CCDC186, PNMA8A POLR3B, STK31, LGMN, KCNQ5, PELI1, RRP15, UNC79, SLC22A23, CCL7, CCL18, SDC2, SELL, SAMSN1, UNKL, SPIB, STAT1, BST2, TAP1 THBS1, TNFAIP6, UCP1, UTY, FCRL2, NEK11, RUBCNL, ABTB1, LIMD2, ZNF436, APOL3, TCL1A, CAMK4, AXIN1, TTLL2, HVCN1, TXLNGY, FCRLA, IFITM1, HELZ2, TNFRSF25, ADAM19, TNFSF10, CD2, CD3D, RSAD2, CD5, UBE2L6, CD14, CD19, MS4A1, TPTE2, CD27, CD86, CD37, ISG15, FAM53B, CD74, CD79A, CD79B, KIAA0753</p> <p>NAMPT, DHRS2, CDKN1A, IGSF6, RAMP2, LILRB2, IKZF1, TRIM22, MYL9, BASP1, CD52, IFI30, GPNMB, FST, SEMA4D, UBD, IFI44, GNLY, TACC2, PRELID3A, CELF2, CES1, GMEB1, CTSC, CEACAM3, LILRB1, FGL2, PNRC1, IFI44L, ADIRF, SDS, LILRB3, LILRA2, RAB31, PIM2, CORO1A, PTP4A3, CHI3L2, CHIT1, MST1L, SLCO2B1, CD300A, VSIG4, MGLL, PLIN2, CCR1, SLC38A10, ADH1B, COL1A2, COL4A1, COL6A1, COL6A2, COL6A3, COMP, ADM, COX7A1, CRABP1, DEFB104A, CRYAB, CSF1R, CSF3R, VCAN, CSTA, CTSS, CX3CR1, CYBA, CYBB, CYP1B1, CYP27A1, DAB2, DGKA, DBP, AEBP1, DEFA3, CFD, DNASE1L3, DNM2, DOCK2, DPYD, TSC22D3, DUSP6, DVL1, TYMP, EDA, ABCA1, AIF1, A2M, EMP3, ENG, STOM, EVI2A, EVI2B, F13A1, FABP4, ACSL1, FCER1G, FCGR2A, FCGR2B, FCGR3A, FCGRT, FCN1, FGFR1, FGR, FKBP5, FOXG1, POMZP3, KIF21B, TBC1D2B, EPB41L3, RGL1, SYNE1, FN1, EXOSC2, SLC7A8, TNFRSF13B, FOLR2, SRRM2, LILRA4, PSD4, FPR1, FPR2, TRIM29, SLC7A11, ALOX5, ALOX5AP, ALPL, ACKR1, QPCT, TNFAIP8, OLFML2B, CCDC9, LRIT1, ZBTB20, LRRC32, GAS1, GBP1, GBP2, GCH1, NUPR1, AMELX, GJB1, LAMP3, ST6GALNAC4, DKK4, CYTH4, SIT1, CNTN6, GLRX, GNA15, TRDD3, GPX3, IGLJ3, TRIB2, GRN, RAC2, ANPEP, CXCL1, GSTM1, GZMA, GZMB, GZMK, SLC40A1, ANXA1, HBA2, HCK, HCLS1, CD209, HK3, HLA-A, HLA-C, HLA-DMA, HLA-DPA1, HLA-DPB1, HLA-DQA1, HLA-DQB1, HLA-DRA, HLA-DRB1, HLA-DRB3, HLA-DRB5, AOA, BIRC3, HSPA6, HSPG2, HTR4, ICAM1, ICAM3, IRF8, APOC1, IFI16, IFI27, IFI35, IFIT1, APOC2, IFNGR1, APOC4, APOD, APOE, IGFBP2, IGFBP3, IGFBP4, IGFBP7, IGHG3, IGHM, JCHAIN, IGKC, IL1B, IL1R1, IL1RAP, IL1RN, IL2RB, IL2RG, IL3RA, IL4R, IL6, IL7R, CXCL8, AQP1, IL10RA, ITGA6, IRF1, AQP9, ISG20, ITGAL, ITGAM, ITGB2, ITGB7, ITPR1, ITPR3, JUNB, KCNA5, KCND3, KCNQ3, KRT4, KRT5, KRT14, KRT15, KRT18, KRT19, KRT86, LAIR1, LAMA3, STMN1, LCK, LCP1, LCP2, LGALS3, LGALS9, ARHGDIB, LIF, ARHGDIG, LIPA, RHOH, FADS1, LMO2, LORICRIN, IRAG2, LRCH4, LSP1, LTBR, LTC4S, LTF, LYN, LYZ, M6PR, MAL, MAN2B1, MAT1A, MB, MDK, MFAP2, CXCL9, MME, MMP9, MNDA, MPO, MRC1, MSI1, MUC1, MX1, MX2, MYH11, NCF1C, NCF2, NCF4, NGFR, NINJ1, NKG7, NNAT, NNMT, ATP2A3, ACR, NRG1, ATP4A, ODF1, OLR1, SIX6, SLC22A18AS, ORM2, SERPINE1, DEF6, UBXN1, LAP3, PLEKHO1, PCOLCE, CRIM1, PLAC8, MS4A4A, CHST15, PDE2A, TRPV2, PDE4B, ANKFY1, PDGFRA, SLC25A39, ENPP1, PECAM1, PER1, CFP, PFKFB3, SERPINA1, PI3, PLA2</p> |



| Gene sets name                | Gene                                                                                                                                                                                                                                                                                                                                                                                                                                                                                                                                                                                                                                                                                                                                                                                                                                                                                                                                                                                                                                                                                                                                                                                                                                                                                                                                                                                                                                                                                                                                                                                                                                                                                                                                                                                                                                                                                                                                                                                                                                                                                                                                                                                                                                                                                                                                                                                                                                                                                                                                                                                                                                                                                                                                                                                                                                                                                                              |
|-------------------------------|-------------------------------------------------------------------------------------------------------------------------------------------------------------------------------------------------------------------------------------------------------------------------------------------------------------------------------------------------------------------------------------------------------------------------------------------------------------------------------------------------------------------------------------------------------------------------------------------------------------------------------------------------------------------------------------------------------------------------------------------------------------------------------------------------------------------------------------------------------------------------------------------------------------------------------------------------------------------------------------------------------------------------------------------------------------------------------------------------------------------------------------------------------------------------------------------------------------------------------------------------------------------------------------------------------------------------------------------------------------------------------------------------------------------------------------------------------------------------------------------------------------------------------------------------------------------------------------------------------------------------------------------------------------------------------------------------------------------------------------------------------------------------------------------------------------------------------------------------------------------------------------------------------------------------------------------------------------------------------------------------------------------------------------------------------------------------------------------------------------------------------------------------------------------------------------------------------------------------------------------------------------------------------------------------------------------------------------------------------------------------------------------------------------------------------------------------------------------------------------------------------------------------------------------------------------------------------------------------------------------------------------------------------------------------------------------------------------------------------------------------------------------------------------------------------------------------------------------------------------------------------------------------------------------|
| REACTOME INNATE IMMUNE SYSTEM | <p>PLEC, PLEK, PLSCR1, ACP5, SASH3, CPVL, ADAMTSL4, CCHCR1, DDIT4, PARP14, PPBP, PPL, OLAH, GIMAP4, PRF1, SRGN, RBM38, CADPS2, RABL6, ARHGAP15, LMO3, PPP4R2, LGMN, B2M, PSG7, SLAMF8, PTGDS, MTUS1, PTPN7, PTPRC, PTPRCAP, PTPRE, NECTIN2, CXCL16, MS4A7, RAB3IL1, RAC2, ACTA2, RARRES2, PLAAT4, RBP1, CCND1, BCL2A1, RGS1, RGS10, RNASE1, RNASE2, RNASE6, BCL6, S100A4, S100A8, S100A9, S100A11, S100P, SCN2B, CCL2, CCL3, CCL4, CCL5, CCL7, CCL11, CCL15, CCL18, CCL19, CCL21, SDC1, CXCL12, GPSM3, SECTM1, SELL, SELPLG, SAMS1, VSIR, SELENOP, SEMA4A, SFTPC, PARP12, ST6GAL1, BMP1, SLA, ACD, SMTN, SLC6A2, SLC15A2, SLPI, SNCG, SPIB, SPP1, STAT1, STAT4, TAGLN, TAP1, TBX1, TBXAS1, TCF7, TDO2, TFF3, TGFBI, TGFB2, TGM2, THRA, TIMP2, TLR1, TLR2, SERPING1, TSPAN7, TSPAN4, CLDN5, CLEC3B, TNF, TNFAIP2, TNFAIP3, C1QB, TNFAIP6, TNFRSF1B, C1QC, TNXB, C1S, C2, TPO, C3AR1, C7, TYROBP, UBE2D1, VCAM1, VWF, WNT10B, CA4, ZYX, LAPT5, CXCR4, LST1, PLA2G7, TNFAIP8L2, KCTD17, PLBD1, COPE, SPSB1, RUBCNL, FAM214B, PLEKHO2, TCL1A, CAPG, KDM5D, CASP1, FERMT3, SRPX, ID2B, NR0B2, CYSTM1, GPR65, ITGA10, IKBKG, H2BC12, CST7, LMO4, CAV1, TP63, RUNX3, DDX3Y, STX11, MARCO, S1PR4, ACTN1, TNFRSF25, ADAM19, TNFSF12, TNFSF10, TNFRSF10D, CREG1, ST3GAL5, IER3, AP1M1, BAIAP3, CCND2, KYNU, CCNF, SLC7A7, N4BP2L1, CLDN9, SLC16A3, CD2, CD3D, CD247, CD4, CD5L, MAGI1, CD6, IL32, UBE2L6, DHRS3, CD8A, CD8B, STK17B, CD14, CD22, CD163, SLC9A3R1, CD27, CD86, ITM2A, ARHGEF6, IL27RA, NAPSA, CD37, GMFG, ENTPD2, NRG2, CD48, CD53, ISG15, CEP135, MARF1, FAM53B, CD69, CD72, ECE2, CD74, CD79A, MAFB, CD302, GFPT2, CLEC2B, CDH1</p> <p>FGR, CFH, FUCA2, ENPP4, AOC1, CASP10, SARM1, CREBBP, MPO, ITGAL, LAMP2, MAP3K14, ALDH3B1, NOS2, PSMB1, MGST1, PGLYRP1, MMP25, MASP2, PRSS3, CD4, BTK, FYN, RNF216, PLAUR, TYROBP, LTF, ALOX5, PSMC4, MVP, POLR3B, DNASE1L1, CAPN1, ACP3, WAS, SLC11A1, MRE11, SERPINB1, C8B, ERP44, BIRC3, DERA, RNASET2, CD44, TNFRSF1B, GRN, LRRC7, GAB2, ATP6V0A1, MAP2K3, VCL, TIMP2, AGA, C6, PSMA4, LCP2, ATP6V1H, HEXB, MAPK9, PIK3CB, CYBA, HEBP2, SIKE1, CUL1, CYFIP2, TAB2, SERPINB3, GDI2, ATG5, ATP11B, POLR3E, SLC2A3, ACAA1, NCKAP1, ELMO2, CASP8, CTSA, CNN2, MAP2K4, PRKCQ, CDK13, PKM, RHOA, ROCK1, MEF2A, OTUD5, ATP11A, RASGRP2, PSME4, KCNAB2, RAB27A, CDC42, RPS6KA2, PRKACA, UBE2D1, NFATC3, STK10, FBXW11, AP1M1, ALPK1, TXK, ACTB, PLD1, RAB7A, ICAM3, MAP2K7, NFKB2, PAK3, UBE2K, PIK3C3, ITCH, BPIFB2, TOLLIP, XRCC5, CEACAM1, PGM1, DNM2, CPB2, PSEN1, HSP90AA1, CFHR2, MEF2C, PTPRC, PKP1, CYLD, PPIE, GSTP1, APOB, RAB10, CD59, FCN1, SCAMP1, CPNE3, B4GALT1, CEACAM6, LAT2, HUWE1, FTL, PSMC5, PTPN4, DEFB127, MAVS, DYNLL1, P2RX7, NOS1, IRAK3, LYZ, CD209, NLRC4, CMTM6, NLRP1, PSME1, SNAP23, UNC13D, ADA2, MAP3K1, PSMD5, TREM2, CRISP3, NCR2, HSP90AB1, ITPR3, DSP, ABL1, RAB18, MYO9B, PSMD8, CDC34, POLR2E, SNAP29, MAPK1, POLR2F, CYB5R3,</p> |

| Gene sets name | Gene                                                                                                                                                                                                                                                                                                                                                                                                                                                                                                                                                                                                                                                                                                                                                                                                                                                                                                                                                                                                                                                                                                                                                                                                                                                                                                                                                                                                                                                                                                                                                                                                                                                                                                                                                                                                                                                                                                                                                                                                                                                                                                                                                                                                                                                                                                                                                                                                                                                                                                                                                                                                                                                                                                                                                                                                                                                                                                                                                                               |
|----------------|------------------------------------------------------------------------------------------------------------------------------------------------------------------------------------------------------------------------------------------------------------------------------------------------------------------------------------------------------------------------------------------------------------------------------------------------------------------------------------------------------------------------------------------------------------------------------------------------------------------------------------------------------------------------------------------------------------------------------------------------------------------------------------------------------------------------------------------------------------------------------------------------------------------------------------------------------------------------------------------------------------------------------------------------------------------------------------------------------------------------------------------------------------------------------------------------------------------------------------------------------------------------------------------------------------------------------------------------------------------------------------------------------------------------------------------------------------------------------------------------------------------------------------------------------------------------------------------------------------------------------------------------------------------------------------------------------------------------------------------------------------------------------------------------------------------------------------------------------------------------------------------------------------------------------------------------------------------------------------------------------------------------------------------------------------------------------------------------------------------------------------------------------------------------------------------------------------------------------------------------------------------------------------------------------------------------------------------------------------------------------------------------------------------------------------------------------------------------------------------------------------------------------------------------------------------------------------------------------------------------------------------------------------------------------------------------------------------------------------------------------------------------------------------------------------------------------------------------------------------------------------------------------------------------------------------------------------------------------------|
|                | <p>TOM1, HMOX1, ARSA, SYNGR1, TAB1, MYH9, GRAP2, NCF4, EP300, POLR3H, CTSG, PYGL, PSMC6, ATP6V1D, PSMA3, LGMN, CHGA, PSMC1, RPS6KA5, PSMB5, PSMA6, NFKBIA, PSME2, MMP9, PYGB, NFATC2, DNAJC5, CTSZ, PSMA7, SIRPB1, HCK, BPI, CST3, EPPIN, VAPA, RNF125, PSMD10, PGRMC1, TLR8, MAGT1, EEA1, GLA, DNAJC3, OLFM4, MAPK3, CCL22, CCL17, PSMD7, COTL1, CRISPLD2, MEFV, CPPED1, HMOX2, PYCARD, VPS35L, CTSH, ATP8B4, RIPK2, IKBKB, GSDMD, PPP2CB, ASAH1, MAN2B1, NFKBIB, RELB, RETN, VRK3, GPI, PLD3, CD33, SIGLEC5, RAB3D, PPP2R1A, PIK3R2, RAB3A, GSDME, ATP6V0A4, TAX1BP1, NOD1, CASP2, PDAP1, WASL, IMPDH1, PSMA2, LIMK1, C5, DNM1, DDX58, MAPK8, PPP3CB, MAP3K8, TSPAN14, PSMD3, P2RX1, KPNB1, ICAM2, PSMD11, DHX58, RAB5C, VAT1, DUSP3, MAP2K6, VTN, ALDOC, LAMTOR3, NFKB1, MANBA, UBE2D3, MAPK10, BST1, CTSC, HSPA8, DTX4, UNC93B1, FOLR3, PANX1, BIRC2, COMMD9, CD81, TCIRG1, PSMD9, MLEC, BIN2, LTA4H, ARPC3, CAND1, RAB5B, PTPN6, CLEC4A, FRK, MAPK14, WASF1, VNN1, CCR6, PPP2R5D, TMEM30A, LY86, C7, FAF2, ITK, ARSB, POLR3G, SKP1, PPP2CA, C9, ATP6V0E1, NIT2, ARMC8, ATP6V1A, MAPKAPK3, ACTR1B, ACTR3, PSMD14, IFIH1, GCA, GNLY, QPCT, SOS1, WIPF1, ATF2, ATP6V1B1, QSOX1, RAP1A, CAPZA1, LAMTOR2, NCF2, CFHR3, CD58, PADI2, CR2, CD46, ATP6V0B, PRDX6, RPS6KA1, CHRN4, MUC5B, CTSD, COLEC11, MMP8, CREB1, TTR, IRAG2, TNFAIP3, ARG1, VAMP8, STBD1, RAB14, TRIM32, NPC2, YPEL5, CPN1, IFNA6, IFNA8, CYSTM1, PDZD11, APAF1, DUSP4, CLU, EPX, TRIM25, A1BG, CAT, CCR2, POLR3GL, PIK3CA, WIPF3, SFTPA1, PLAU, HVCN1, ITPR2, PRDX4, ADGRE5, ATF1, ARHGAP9, NCKAP1L, RAB9B, TNFAIP6, RAP2C, C4BPA, C4BPB, PI3, SLPI, PLCG1, SEMG1, ZBP1, ATP8A1, CEACAM8, SERPINB6, TREM1, LRRFIP1, MYH2, IL1B, C3, DEFB126, CD93, PSMF1, DEFB129, BPIFB1, PSMB2, IRF3, HTN1, CFP, ELK1, TRAF2, MASP1, RAP1B, PTPRB, PIN1, UBR4, TICAM1, AAMP, SEM1, FGL2, RAC2, ATP6V1F, COPB1, PSMA1, PLD2, CD68, SLC44A2, SIGLEC9, RIPK3, ART1, LBP, CRACR2A, MOSPD2, ECSIT, PRKCSH, BST2, ARPC1B, UBE2M, GMFG, LILRB2, BPIFA2, DEFB118, ATP6V1E1, NFATC1, CAP1, TRAF3, ADGRE3, RBSN, PSME3, ACLY, DIAPH1, UBE2D2, ACTR10, LGALS3, TRIM21, RAF1, CLEC10A, SNAP25, POLR3F, CRP, CASP9, WASF3, CHI3L1, CHIT1, SFTPD, KRAS, AMPD3, CD180, IRAK2, VAV3, CFHR4, CFHR5, DOCK2, KLRD1, DSG1, DSC1, TCN1, C5AR2, OSTF1, CTSL, CD36, MAP3K7, CD63, TEC, GNS, DHX9, TMBIM1, CAB39, CKAP4, RAC1, DBNL, TANK, ABI1, TXN, TLR4, ATP6V1G1, PSMB7, CTSV, IFNA21, CNPY3, RIPK1, TLR2, PRCP, GGH, SDCBP, PPP2R1B, CASP1, ADAM10, ACTR2, DNAJC13, IDH1, ABI2, ITGAV, HERC5, PPP3CA, GLIPR1, DUSP6, SLC15A4, GPR84, RHOF, PELI2, SLC27A2, SRP14, PSTPIP1, IQGAP1, ITGAX, NLRC5, PDPK1, GALNS, TMC6, PFKL, VAV1, TRPM2, APP, PSMB6, SLC2A5, FCN3, BCL10, PRKACB, PSMA5, CD53, CREG1, FCGR2A, CTSK, FLG2, S100A8, S100A7, ILF2, DEGS1, C1orf35, ARL8A, ATP6V1C2, RPS27A, REG3G, STK11IP, DYNC1L1, UBA3, MUC4, AHSG, PLAC8, TIFA, MYO10, PIK3R1, IQGAP2, ATG12, DOK3, DYNLT1, TRIM4, FRMPD3, ATP6V1B2, GOLGA7, PLPP5, ATP6V0D2,</p> |

| Gene sets name | Gene                                                                                                                                                                                                                                                                                                                                                                                                                                                                                                                                                                                                                                                                                                                                                                                                                                                                                                                                                                                                                                                                                                                                                                                                                                                                                                                                                                                                                                                                                                                                                                                                                                                                                                                                                                                                                                                                                                                                                                                                                                                                                                                                                                                                                                                                                                                                                                                                                                                                                                                                                                                                                                                                                                                                                                                                                                                                                                                                                                        |
|----------------|-----------------------------------------------------------------------------------------------------------------------------------------------------------------------------------------------------------------------------------------------------------------------------------------------------------------------------------------------------------------------------------------------------------------------------------------------------------------------------------------------------------------------------------------------------------------------------------------------------------------------------------------------------------------------------------------------------------------------------------------------------------------------------------------------------------------------------------------------------------------------------------------------------------------------------------------------------------------------------------------------------------------------------------------------------------------------------------------------------------------------------------------------------------------------------------------------------------------------------------------------------------------------------------------------------------------------------------------------------------------------------------------------------------------------------------------------------------------------------------------------------------------------------------------------------------------------------------------------------------------------------------------------------------------------------------------------------------------------------------------------------------------------------------------------------------------------------------------------------------------------------------------------------------------------------------------------------------------------------------------------------------------------------------------------------------------------------------------------------------------------------------------------------------------------------------------------------------------------------------------------------------------------------------------------------------------------------------------------------------------------------------------------------------------------------------------------------------------------------------------------------------------------------------------------------------------------------------------------------------------------------------------------------------------------------------------------------------------------------------------------------------------------------------------------------------------------------------------------------------------------------------------------------------------------------------------------------------------------------|
|                | <p>POLR2K, NAPRT, IFNA5, IFNA16, STOM, GSN, ALAD, SURF4, PTGES2, LCN2, COMMD3, POLR3A, SERPING1, PTPRJ, PAK1, LAMTOR1, TKFC, MS4A3, MS4A2, DSN1, ALDOA, FCGR1A, TIRAP, DOCK1, UBC, ITPR1, NDUFC2, ATP6V1G3, ADAM8, LPCAT1, TOMM70, LY96, PSMA8, PTPRN2, ATP6V1C1, ELMO1, CCT8, EEF1A1, PRG3, UBE2L6, MAPK13, C8A, TAB3, NCK1, WASF2, NCF1, CDA, FCER1G, C1QC, PSMD4, PSMB4, C1R, PGLYRP3, ATP6V0D1, ATAD3B, PDXK, CSTB, ITGB2, VAV2, S100B, FCN2, NLRP4, CD3G, S100A1, SHC1, NLRX1, NBEAL2, HK3, PGLYRP2, PSMC2, DCD, POLR3K, AGL, ARPC5, NLRP3, NCSTN, FCGR3B, MAPKAPK2, PIGR, CTSS, S100A11, PGLYRP4, S100A9, S100A12, CXCR1, ARPC2, NFASC, MNDA, IFI16, AIM2, PSMD6, PTX3, PPBP, CXCL1, GYG1, POLR2H, PRKCD, S100P, CAMP, APEH, DUSP7, TLR3, LEAP2, CGAS, FABP5, BRI3, CTSB, DEFA5, DEFA4, DEFA6, DEFB1, NOS3, SYK, PRKACG, HGSNAT, CYBB, ATP7A, VCP, SUGT1, MBL2, RNASE7, PSMC3, BTRC, CCT2, C2, PLD4, MAPK7, CLEC4E, CLEC4D, HSP90B1, SERPINB12, B2M, ANPEP, STAT6, BPIFB6, CRK, NOD2, LPO, RAB4B, LAIR1, EEF2, KRT1, CD300A, GHDC, NLRC3, FTH1, CTNNA1, FADD, PAFAH1B2, NKIRAS2, RAB31, POLR3D, AHCYL1, TNIP2, MAP2K1, RAB24, PGM2, RNASE2, RNASE3, PTK2, PTAFR, RNASE6, MUC15, AGPAT2, TRIM56, MUC17, MUC3A, ITGAM, GUSB, TRAPPC1, GLB1, UBB, FOS, CD14, PA2G4, OSCAR, CEACAM3, FPR2, FPR1, ATP6V0E2, PRKCE, MUC7, LRG1, GAA, CANT1, PGAM1, POLR1C, WIPF2, BCL2L1, FGG, FGA, FGB, DEFB4A, RASGRP4, BCL2, IFNB1, C3AR1, REG3A, ORMDL3, MALT1, AZU1, CLEC7A, CLEC12A, MUCL1, RASGRP1, CFL1, RAB37, MYD88, RELA, HPSE, HSPA6, C1QB, C1QA, OLR1, RNASE8, SAA1, PSMD1, MUC13, JUP, SLCO4C1, TLR10, TLR1, TLR6, PELI3, HRAS, DHX36, TRAF6, PSMD2, TBC1D10C, RAB6A, BAIAP2, YES1, KCMF1, DEFB104A, DEFB103A, C8G, MUC20, DPP7, DEFB104B, RHOG, ANO6, RPS6KA3, DEFB103B, DEFB4B, CD19, ATOX1, JUN, DEFB114, POLR2L, GRB2, UBE2N, IMPDH2, CALML5, DEFB125, CPN2, CD300LB, FUCA1, PTPN11, FCER1A, ABCA13, ITLN1, F2, PAK2, DEFB124, DEFB123, ARHGAP45, DEFB119, CXCR2, DEFB112, MUC16, RAP2B, RNF135, IST1, UBA7, ATP6AP2, C1S, ANXA2, LCK, ADGRG3, MCEMP1, AP2A2, DDX41, TUBB, TBK1, ACTG1, IRAK1, DEFB108B, S100A7A, COLEC10, PLA2G6, NEU1, PROS1, STING1, MUC6, DGAT1, C6orf120, SIGIRR, SFTPA2, SOCS1, ATP6V0A2, MAPK11, METTL7A, TMEM179B, MUC1, IRF7, PSMD13, ATP6V0C, LAMP1, DEFB128, POLR3C, DEFB131A, POLR1D, BPIFB4, CD300E, FCAR, DEFB132, DEFB105A, DEFB107A, NF2, DEFB106A, DEFB105B, PRG2, IFNA10, DEFB106B, TLR5, ISG15, CARD9, MAPK12, TUBB4B, PLA2G2A, IFNA2, SELL, NHLRC3, HMGB1, SERPINA3, TMEM63A, TUBB, PPIA, CD55, PRTN3, XRCC6, PIK3R4, MME, TLR7, GM2A, CD47, CASP4, SIGLEC15, IGF2R, DYNC1H1, PCBP2, SRC, PSMD12, SERPINA1, PELI1, C5AR1, MYO5A, GZMM, ATG7, ELANE, SPTAN1, PSAP, CFD, MYO1C, NKIRAS1, HRNR, IFNA1, PLCG2, DNM3, IRAK4, SIRPA, DEFB107B, SVIP, CLEC4C, BPIFA1, CARD11, CALM1, CEP290, PNP, CD247, CAPZA2, APRT, CR1, FCGR3A, PLPP4, DEFB110, PSMB8, AGER, C2, NEU1, HSPA1B, HSPA1A, CSNK2B, HLA-C, MUC21, DEFB121, LILRB3, HLA-E,</p> |

| Gene sets name | Gene                                                                                                                                                                                                                                                                                                                                                                                                                                                                                                                                                                                                                                                                                                                                                                                                                                                                                                                                                                                                                                                                                                                                                                                                                                                                                                                                                                                                                                                                                                                                                                                                                                                                                                                                                                                                                                                                                                                                                                                                                                                                                                                                                                                                                                                                                                                                                                                                                                                                                                                                                                                                                                                                                                                                                                                                                                                                                                                                                                                                                                                              |
|----------------|-------------------------------------------------------------------------------------------------------------------------------------------------------------------------------------------------------------------------------------------------------------------------------------------------------------------------------------------------------------------------------------------------------------------------------------------------------------------------------------------------------------------------------------------------------------------------------------------------------------------------------------------------------------------------------------------------------------------------------------------------------------------------------------------------------------------------------------------------------------------------------------------------------------------------------------------------------------------------------------------------------------------------------------------------------------------------------------------------------------------------------------------------------------------------------------------------------------------------------------------------------------------------------------------------------------------------------------------------------------------------------------------------------------------------------------------------------------------------------------------------------------------------------------------------------------------------------------------------------------------------------------------------------------------------------------------------------------------------------------------------------------------------------------------------------------------------------------------------------------------------------------------------------------------------------------------------------------------------------------------------------------------------------------------------------------------------------------------------------------------------------------------------------------------------------------------------------------------------------------------------------------------------------------------------------------------------------------------------------------------------------------------------------------------------------------------------------------------------------------------------------------------------------------------------------------------------------------------------------------------------------------------------------------------------------------------------------------------------------------------------------------------------------------------------------------------------------------------------------------------------------------------------------------------------------------------------------------------------------------------------------------------------------------------------------------------|
|                | <p>CD177, PSMB10, MUC12, CFI, HTN3, KLRC2, CLEC6A, DEFB134, DEFB135, DEFB136, DEFA1, PSMB8, AGER, C4A, C2, CSNK2B, ATP6V1G2, HLA-E, HLA-A, HLA-A, IGKV4-1, IGKV5-2, IGKV3D-20, IGLV6-57, IGLV1-51, IGLV1-47, IGLV1-44, IGLV7-43, IGLV1-40, IGLV3-27, IGLV3-25, IGLV2-23, IGLV3-21, IGLV3-19, IGLV2-14, IGLV2-11, IGLV3-1, IGLC2, IGLC3, IGHE, IGHG4, IGHG2, IGHG1, IGHV1-2, IGHV2-5, IGHV3-7, IGHV3-11, IGHV3-13, IGHV3-23, IGHV3-33, IGHV4-34, IGHV4-39, IGHV1-46, IGHV3-48, IGHV3-53, IGHV1-69, HSPA1B, NRAS, CHUK, LAT, NCKIPSD, TREX1, ATP6V1G2, KLRK1, IFNA7, CPNE1, DEFB113, DEFB133, MUC5AC, DDX3X, HSPA1A, DEFB116, DEFB115, PPP3R1, UBA52, PSMB11, HLA-B, NEU1, HLA-A, TUBB, IGHV4-59, C4B, CSNK2B, HSPA1B, CSNK2B, HLA-E, HLA-C, PSMB8, C2, ATP6V1G2, NEU1, NEU1, MUC21, ATP6V1G2, TUBB, C4A, IFNA14, C4B, ORM2, C4B, NEU1, CSNK2B, AGER, HLA-E, ORM1, TUBB, PSMB8, HLA-E, AGER, PSMB8, CSNK2B, ATP6V1G2, AGER, C2, HSPA1B, PSMB8, TUBB, TUBB, HSPA1B, DEFB130A, CSNK2B, DEFB130B, C4B_2, IFNA13, HLA-E, NEU1, HSPA1A, ATP6V1G2, AGER, HLA-B, IFNA17, NEU1, ATP6V1G2, C2, TUBB, NFAM1, C2, PSMB8, HSPA1A, PSMB8, C4B, HLA-E, IFNA4, AGER, HSPA1A, TXNDC5, IGKV2D-30, TLR9, CFB, PSMB9, DEFA3, IGKV3-20, IGKV1D-33, PSMB9, PSMB9, DEFA1B, IGKV1-17, PSMB9, IGKV1-16, MIF, IGKV1D-16, CFB, CRCP, IGKV3-11, CFB, ARPC4, ARPC1A, PLEKHO2, IGKV1-33, CFB, IGKV1-39, IGKV2D-28, SERPINB10, PSMB9, PSMB9, IGKV2-30, IGKV1-12, TICAM2, IGKV1-5, CFB, PSMB9, CFB, NME2, PSMB9, DDOST, IGKV2-28, CFHR1, IGKV3-15, UBE2V1, C4A, HBB, TARM1, EPPIN-WFDC6, ATP6V1E2, IGKV2D-40, IGKV1D-39, PRKDC, LYN, SIGLEC14, BRK1, RAB44, HP, MGAM, CLEC5A, PECAM1, PTPRC, ATP6V1G3, IKBKE, TXNIP, IKBKG, IGHV3-30, OSCAR, DEFB103B, B2M, FCAR, CYFIP1, TARM1, LILRA3, LAIR1, KIR2DS4, IGHG2, LILRB2, IGLV1-40, IGHV2-70, FCAR, LILRB3, CFD, OSCAR, DEFB105B, IGLV1-44, TARM1, KIR2DS4, KIR2DS4, LILRB3, TARM1, FCAR, FCAR, KIR2DS4, TARM1, KIR3DS1, DEFB4B, KIR2DS2, LILRB2, MUC20, OSCAR, FCAR, ALOX5, OSCAR, KIR2DS4, OSCAR, DEFB106B, TARM1, LILRA3, PRSS2, PSMB3, FCAR, LAIR1, TARM1, LILRB2, KIR2DS4, LAIR1, LILRA3, IGHE, KIR2DS1, TARM1, KIR2DS4, IGHV4-34, HRAS, IRF7, MUC20, TARM1, KIR2DS4, MIF, CHGA, FCAR, KIR2DS4, OSCAR, FCAR, DEFB104B, IGHG4, OSCAR, TARM1, IGHV2-5, HMOX2, DEFB107B, ELANE, IGHG1, PSMB3, PRTN3, KIR2DS2, LILRA3, MUC20, KIR2DS1, LAIR1, IGLV2-8, IGLV7-43, KIR2DS2, OSCAR, FCAR, NAPRT, OSCAR, AZU1, GSDMD, IGKV1D-12, SURF4, PSMC4, RPS6KA1, IGKV2-30, IGHV3-23, IGKV1-17, IGKV2-28, PRSS2, IGKV1-39, IGHV1-46, IGKV5-2, IGHV3-7, IGKV1-16, IGHV3-13, IGHV3-11, IGHV1-69, IGKV3-20, IGKV3-15, IGHV1-2, IGHV4-39, IGHV3-53, IGHV3-48, IGHV4-59, IGKV1-12, IGHV3-30, IGKV1-5, IGKV1-33, IGKV3-11, NFKBIB, HTN3, HTN1, MUC5AC, MUC6, FCAR, KIR2DS4, KIR2DS4, FCAR, FCAR, FCAR, KIR2DS1, KIR2DS1, FCAR, KIR2DS4, POLR3E, DEFB134, DEFB1, PSME2, PSME1, DEFB106B DEFB103A, DEFB107B, DEFA1, DEFB105B, DEFB104A, DEFB136, CTSB, DEFA6, DEFA1B, DEFB4A, DEFB130A, DEFA5, DEFA4, DEFB104B, DEFB135, DEFB103A, RIPK3, DEFB105B, DEFB107A, DEFB4B,</p> |

| Gene sets<br>name                                         | Gene |
|-----------------------------------------------------------|------|
| DGAT1, DEFB106A, KIR2DS5, STING1, KIR2DS5, CYFIP1, PRKACA |      |

**Supplementary Table 2** Immune response gene sets from from the MsigDB database (<https://www.gsea-msigdb.org/gsea/msigdb>).

| Gene sets name                      | Genes                                                                                                                                                                                                                                                                                                                                                                                                                                                                                                                                                                                                                                                                                                                                                                                                                                                                                                                                                                                                                                                                                                                                                                                                                                                                                                                                                                                                                                                                                                                                                                                                                                                                                                                                                                                                                                                                                                                                                                                                                                                                                                                                                                      |
|-------------------------------------|----------------------------------------------------------------------------------------------------------------------------------------------------------------------------------------------------------------------------------------------------------------------------------------------------------------------------------------------------------------------------------------------------------------------------------------------------------------------------------------------------------------------------------------------------------------------------------------------------------------------------------------------------------------------------------------------------------------------------------------------------------------------------------------------------------------------------------------------------------------------------------------------------------------------------------------------------------------------------------------------------------------------------------------------------------------------------------------------------------------------------------------------------------------------------------------------------------------------------------------------------------------------------------------------------------------------------------------------------------------------------------------------------------------------------------------------------------------------------------------------------------------------------------------------------------------------------------------------------------------------------------------------------------------------------------------------------------------------------------------------------------------------------------------------------------------------------------------------------------------------------------------------------------------------------------------------------------------------------------------------------------------------------------------------------------------------------------------------------------------------------------------------------------------------------|
| Antigen Processing and Presentation | <p>AZGP1, B2M, CALR, CANX, CD1A, CD1B, CD1C, CD1D, CD1E, CD4, CD8A, CD8B, CD74, CREB1, CTSB, CTSE, CTSL, CTSS, FCER1G, FCGRT, PDIA3, HFE, HLA-A, HLA-B, HLA-C, HLA-DMA, HLA-DMB, HLA-DOA, HLA-DOB, HLA-DPA1, HLA-DPB1, HLA-DQA1, HLA-DQA2, HLA-DQB1, HLA-DRA, HLA-DRB1, HLA-DRB3, HLA-DRB4, HLA-DRB5, HLA-E, HLA-F, HLA-G, HLA-H, MR1, HSPA1A, HSPA1B, HSPA1L, HSPA2, HSPA4, HSPA5, HSPA6, HSPA8, HSP90AA1, HSP90AB1, ICAM1, IFNA1, IFNA2, IFNA4, IFNA5, IFNA6, IFNA7, IFNA8, IFNA10, IFNA13, IFNA14, IFNA16, IFNA17, IFNA21, IFNG, KIR2DL1, KIR2DL2, KIR2DL3, KIR2DL4, KIR2DS1, KIR2DS3, KIR2DS4, KIR2DS5, KIR3DL1, KIR3DL2, KLRC1, KLRC2, KLRC3, KLRD1, LTA, CIITA, MICA, MICB, NFYA, NFYB, NFYC, LGMN, PSMB8, PSMC1, PSMC2, PSMC3, PSMC4, PSMC5, PSMC6, PSMD1, PSMD2, PSMD3, PSMD4, PSMD5, PSMD7, PSMD8, PSMD10, PSMD11, PSMD13, PSME1, PSME1, PSME2, PSME2, RELB, RFX5, RFXAP, SLC10A2, TAP1, TAP2, TAPBP, THBS1, SEM1, KLRC4, AP3B1, RFXANK, PSMD6, PSME3, PSMD14, CLEC4M, IFI30, PROCR, ADRM1, ECPAS, TRPC4AP, CD209, UBXN1, ERAP1, TAPBPL, KIR2DL5A, ERAP2, ULBP3, ULBP2, ULBP1, KIR3DL3, RAET1E, RAET1L, UBR1, RAET1G, PDIA2</p>                                                                                                                                                                                                                                                                                                                                                                                                                                                                                                                                                                                                                                                                                                                                                                                                                                                                                                                                                                                                                                   |
| Antimicrobials                      | <p>HAMP, PI3, CAMP, DEFB4A, PPBP, REG3G, CXCL14, CXCL16, SLPI, CXCL8, CXCL10, CXCL9, CXCL5, CXCL11, CXCL6, CXCL1, CXCL12, CXCL13, CXCL2, PF4, XCL1, CXCL3, DEFB103B, CCL13, CCL1, DEFB1, CCL8, ELANE, DEFB103A, DEFA3, DEFA1, TMSB10, DEFA6, DEFA5, DEFA4, LCN2, LCN1, COLEC10, BPI, S100A9, S100A8, DCD, LCN6, S100A12, HTN3, LCN8, DEFA1B, CCR10, CELA1, DEFB106A, PENK, BPIFC, MMP12, BPIFB6, LEAP2, SFTPD, LCN9, BPIFB2, PTGDS, TMSB4X, PGLYRP1, ZC3HAV1, TMSB15A, S100B, S100A13, S100A6, DEFB119, DEFB107A, DEFB105A, SERPIND1, DEFB129, DEFB127, S100P, S100A7, DEFB104A, DEFB126, DEFB106B, DEFB104B, DEFB107B, PGLYRP3, PGLYRP2, S100A10, S100A2, DEFB125, DEFB123, DEFB105B, DEFB132, BPIFB3, LCN12, PGLYRP4, S100A11, S100A5, S100A3, S100A1, DEFB128, DEFB108B, HTN1, LMBR1L, S100A7A, DEFB118, COLEC12, TMSB4Y, DEFB131A, DEFB134, DEFB130A, DEFB124, DEFB121, DEFB116, DEFB115, DEFB114, DEFB113, DEFB112, DEFB110, TMSB15B, DEFB133, S100Z, MAVS, TMSB4XP8, S100A14, LCN10, S100A16, DEFB136, DEFB135, DEFB117, DEFB110, ZC3HAV1L, S100A7L2, MBL3P, DEFB4B, BPIFB4, IFNAR1, AZU1, DEFB131B, DEFA1A3, LCN1P1, S100G, DEFA7P, DEFB130B, DEFB108F, DEFB131C, TCHHL1, TINAGL1, IFNGR1, SLC22A17, WFIKKN1, WFDC2, IL6, UMODL1, TGFB1, PF4V1, MMP9, ANOS1, TLR4, IFNG, SPAG11B, A2M, CTSL, NFKB1, APOBEC3G, FABP6, NOD2, MBL2, SFTPA1, RBP1, TLR2, SLC40A1, PLAU, IL1B, PAEP, HJV, MUC5AC, CTSS, OBP2A, PLTP, MX1, DDX58, IFNL1, IRF3, SFTPA2, LPA, LBP, RBP4, SFTPA1, NOX4, LTF, IFNB1, RBP5, FABP7, FABP5, FABP3, FABP2, FABP4, R3HDML, BPIFA3, BPIFB1, OASL, CRABP2, CRABP1, RBP7, DUOX1, OBP2B, RBP2, LCN15, CETP, FABP12, FABP9, BPIFA1, LCNL1, C8G, SPAG11A, PI15, NOX1, PMP2, APOD, ORM2, ORM1, TNF, CTSG, PRTN3, MAPK1, PML, AEN, CYBB, BPIFA2, ISG20, BCL3, ISG20L2, NOX5, NOX3, DUOX2, TLR3, TFRC, IFIH1, LRP1, TRIM5, IDO1, GDF15, NEDD4, ADIPOQ, STAT3, STAT1, IFNL2, SOCS3, SEMG1, TNFSF10, CCL20, SOCS1, RNASEL, IRF1, IL15, APOBEC3F, PLAAT4, CHIT1, IFNA1, CD40, TLR7, PPIA, HFE, ZYX, NLRX1, PGC, VEGFA, IKBKE, ISG15, DHX58, TNFAIP3, TFR2, FCN2, MUC4, F2R, ELN, IL27, MAPT, LYZ, CCL5, LEP, CYLD, KLKB1, CST4, CSRP1, MAPK14, JUN, ITGAV,</p> |

| Gene sets name        | Genes                                                                                                                                                                                                                                                                                                                                                                                                                                                                                                                                                                                                                                                                                                                                                                                                                                                                                                                                                                                                                                                                                                                                                                                                                                                                                                                                                                                                                                                                                                                                                                                                                                                                                                                                                                                                                                                                                                                                                                                                                                                                                                                                                                                                                                                                                                                                                                                                                                                                                                                                                                                                                                                                                                                                                                                                                                                                                                                                                                                                                                                                                                                                                                                                                                                                                                                                                                                                                                                                                                                                                                                             |
|-----------------------|---------------------------------------------------------------------------------------------------------------------------------------------------------------------------------------------------------------------------------------------------------------------------------------------------------------------------------------------------------------------------------------------------------------------------------------------------------------------------------------------------------------------------------------------------------------------------------------------------------------------------------------------------------------------------------------------------------------------------------------------------------------------------------------------------------------------------------------------------------------------------------------------------------------------------------------------------------------------------------------------------------------------------------------------------------------------------------------------------------------------------------------------------------------------------------------------------------------------------------------------------------------------------------------------------------------------------------------------------------------------------------------------------------------------------------------------------------------------------------------------------------------------------------------------------------------------------------------------------------------------------------------------------------------------------------------------------------------------------------------------------------------------------------------------------------------------------------------------------------------------------------------------------------------------------------------------------------------------------------------------------------------------------------------------------------------------------------------------------------------------------------------------------------------------------------------------------------------------------------------------------------------------------------------------------------------------------------------------------------------------------------------------------------------------------------------------------------------------------------------------------------------------------------------------------------------------------------------------------------------------------------------------------------------------------------------------------------------------------------------------------------------------------------------------------------------------------------------------------------------------------------------------------------------------------------------------------------------------------------------------------------------------------------------------------------------------------------------------------------------------------------------------------------------------------------------------------------------------------------------------------------------------------------------------------------------------------------------------------------------------------------------------------------------------------------------------------------------------------------------------------------------------------------------------------------------------------------------------------|
| BCR Signaling_Pathway | <p>IRF5, CCR6, IL12B, TLR8, GNLY, CD81, EIF2AK2, APOM, CACYBP, NOD1, MAPK8, MAPK3, BST2, BPHL, PLA2G2A, GRN, NEWENTRY, PDGFRA, GNAI1, WNT5A, FURIN, ADAR, TYK2, NOS2, TRAF3, TPT1, TPM2, NEO1, AHNAK, TLR1, TK2, PRDX2, MX2, FGF2, FGA, TCF7L2, F2RL1, TKFC, MSR1, NFKBIZ, LMBR1, EPPIN, SRC, MPO, ELAVL1, ROBO3, SP1, SOD1, PDF, DLL4, ECD, SLC11A1, DMBT1, STING1, SKIV2L, SEMG2, LTA, DES, DCK, DAXX, TNFRSF10A, TNFRSF10B, EED, CCL4, LIMS1, LALBA, APOBEC3H, TMPRSS6, SPINK5, MARCO, BECN1, TNFSF11, KNG1, CSK, KLRK1, KCNH2, JUND, JAK1, CREB1, CLDN4, CCL28, RNASE3, RN7SL1, IRF7, IREB2, ILK, IL18, IL17A, LTB4R, APOBEC3A, MASP2, TRIM27, RELA, IL7R, IL1A, PTX3, IFNAR2, IFN1@, SYTL1, APOBEC3C, DDX17, PTGS2, HTR1A, SEPTIN7, CD40LG, CD14, CD8A, CD4, MASP1, PROC, MAP2K2, MAP2K1, HRG, NDRG1, IRF9, TRIM22, LANCL1, PPP4C, HMOX1, HMGB1, HLA-B, RNASE7, ABCC4, HGF, HDAC1, IFNLR1, PLSCR1, B2M, BACH2, TANK, PIK3CG, ARRB1, RSAD2, STAB2, TBK1, PDYN, PDGFRB, PDCD1, PCSK2, PCSK1, ARG2, AQP9, FASLG, APOH, BIRC5, ANXA6, IL22, VTN, VIM, VCAM1, PRDX1, GFAP, GBP2, ALB, SLC29A3, OAS1, AGER, UNC93B1, TNFSF4, NOS1, ACTG1, ACTA1, ACO1, SERPINA3, CXCR1, CCL15, CCL14, CCL4, CCL16, CCL19, CCL13, CCL18, CCL17, CCL26, CCL22, CCR3, CCL28, CCL4L1, ACKR2, CCR7, CCL27, CCR8, ACKR4, CCR10, CCL2, CCL21, CCL7, CCL5, CCL3, CCL20, CCL11, CCR5, CCL23, CCL25, CCL1, CCL3L3, CCL4L2, CXCL12, XCL1, CCL8, CCL3L1, CCR1, CCL24, XCL2, CXCL1, CXCL10, CXCR4, CXCL2, CXCR6, CCR4, CXCL11, TAFA5, TAFA3, TAFA4, TAFA1, TAFA2, CCL15-CCL14, IL6, TNF, IL1B, IL18, PTK2B, VEGFA, IL4, CDH1, CD40, DEFB103B, F2RL1, MMP9, LTBP1, DEFB4A, TNFSF10, IL13, IL10, IL2, PPARG, FGR, MIF, CRP, JAK2, IL1A, PTK2, PTGDR, CD86, HCK, ARRB1, GNAI1, VDR, OLR1, GRK2, TXK, RNASE2</p> <p>CD79A, CD79B, LYN, SYK, BTK, BLNK, VAV3, VAV1, VAV2, RAC1, RAC2, RAC3, PPP3CA, PPP3CB, PPP3CC, CHP1, PPP3R1, PPP3R2, CHP2, NFAT5, NFATC1, NFATC2, NFATC3, NFATC4, HRAS, KRAS, NRAS, FOS, JUN, CARD11, BCL10, MALT1, CHUK, IKBKB, IKBKG, NFKB1, RELA, NFKBIA, NFKBIB, NFKBIE, CD81, CD19, CR2, PIK3R5, PIK3R1, PIK3R2, PIK3R3, PIK3CA, PIK3CB, PIK3CD, PIK3CG, AKT3, AKT1, AKT2, GSK3B, INPP5D, CD22, CD72, PTPN6, LILRB3, FCGR2B, RASGRP3, PLCG2, PRKCB, IFITM1, IGH, IGHA1, IGHA2, IGHD, IGHD1-1, IGHD1-14, IGHD1-20, IGHD1-26, IGHD1-7, IGHD2-15, IGHD2-2, IGHD2-21, IGHD2-8, IGHD3-10, IGHD3-16, IGHD3-22, IGHD3-3, IGHD3-9, IGHD4-11, IGHD4-17, IGHD4-23, IGHD4-4, IGHD5-12, IGHD5-18, IGHD5-24, IGHD5-5, IGHD6-13, IGHD6-19, IGHD6-25, IGHD6-6, IGHD7-27, IGHE, IGHG1, IGHG2, IGHG3, IGHG4, IGHJ1, IGHJ2, IGHJ3, IGHJ4, IGHJ5, IGHJ6, IGHM, IGH, IGHV1-18, IGHV1-2, IGHV1-24, IGHV1-3, IGHV1-45, IGHV1-46, IGHV1-58, IGHV1-69, IGHV1-8, IGHV1-38-4, IGHV1-69-2, IGHV2-26, IGHV2-5, IGHV2-70, IGHV3-11, IGHV3-13, IGHV3-15, IGHV3-16, IGHV3-20, IGHV3-21, IGHV3-23, IGHV3-30, IGHV3-30-3, IGHV3-30-5, IGHV3-33, IGHV3-35, IGHV3-38, IGHV3-43, IGHV3-48, IGHV3-49, IGHV3-53, IGHV3-64, IGHV3-66, IGHV3-7, IGHV3-72, IGHV3-73, IGHV3-74, IGHV3-9, IGHV3-38-3, IGHV3-69-1, IGHV4-28, IGHV4-30-1, IGHV4-30-2, IGHV4-30-4, IGHV4-31, IGHV4-34, IGHV4-39, IGHV4-4, IGHV4-59, IGHV4-61, IGHV4-38-2, IGHV5-51, IGHV5-10-1, IGHV6-1, IGHV7-4-1, IGHV7-81, IGK, IGKC, IGKDEL, IGKJ, IGKJ1, IGKJ2, IGKJ3, IGKJ4, IGKJ5, IGKV@, IGKV1-12, IGKV1-13, IGKV1-16, IGKV1-17, IGKV1-27, IGKV1-33, IGKV1-37, IGKV1-39, IGKV1-5, IGKV1-6, IGKV1-8, IGKV1-9, IGKV1D-12, IGKV1D-13, IGKV1D-16, IGKV1D-17, IGKV1D-33, IGKV1D-37, IGKV1D-39, IGKV1D-42, IGKV1D-43, IGKV1D-8, IGKV2-24, IGKV2-28, IGKV2-30, IGKV2-40, IGKV2D-24,</p> |

| Gene sets name      | Genes                                                                                                                                                                                                                                                                                                                                                                                                                                                                                                                                                                                                                                                                                                                                                                                                                                                                                                                                                                                                                                                                                                                                                                                                                                                                                                                                                                                                                                                                                                                                                                                                                                                                                                                                       |
|---------------------|---------------------------------------------------------------------------------------------------------------------------------------------------------------------------------------------------------------------------------------------------------------------------------------------------------------------------------------------------------------------------------------------------------------------------------------------------------------------------------------------------------------------------------------------------------------------------------------------------------------------------------------------------------------------------------------------------------------------------------------------------------------------------------------------------------------------------------------------------------------------------------------------------------------------------------------------------------------------------------------------------------------------------------------------------------------------------------------------------------------------------------------------------------------------------------------------------------------------------------------------------------------------------------------------------------------------------------------------------------------------------------------------------------------------------------------------------------------------------------------------------------------------------------------------------------------------------------------------------------------------------------------------------------------------------------------------------------------------------------------------|
| Chemokine Receptors | IGKV2D-28, IGKV2D-29, IGKV2D-30, IGKV2D-40, IGKV3-11, IGKV3-15, IGKV3-20, IGKV3-7, IGKV3D-11, IGKV3D-15, IGKV3D-20, IGKV3D-7, IGKV4-1, IGKV5-2, IGKV6-21, IGKV6D-21, IGKV6D-41, IGL, IGLC1, IGLC2, IGLC3, IGLC6, IGLC7, IGLJ, IGLJ1, IGLJ2, IGLJ3, IGLJ4, IGLJ5, IGLJ6, IGLJ7, IGLV@, IGLV1-36, IGLV1-40, IGLV1-44, IGLV1-47, IGLV1-50, IGLV1-51, IGLV10-54, IGLV11-55, IGLV2-11, IGLV2-14, IGLV2-18, IGLV2-23, IGLV2-33, IGLV2-8, IGLV3-1, IGLV3-10, IGLV3-12, IGLV3-16, IGLV3-19, IGLV3-21, IGLV3-22, IGLV3-25, IGLV3-27, IGLV3-32, IGLV3-9, IGLV4-3, IGLV4-60, IGLV4-69, IGLV5-37, IGLV5-39, IGLV5-45, IGLV5-48, IGLV5-52, IGLV6-57, IGLV7-43, IGLV7-46, IGLV8-61, IGLV9-49<br>C5AR1, ACKR2, CCR1, CCR10, CCR3, CCR4, CCR5, CCR6, CCR7, CCR8, CCR9, ACKR4, CCRL2, CMKLR1, CX3CR1, CXCR3, CXCR4, CXCR5, CXCR6, ACKR3, CYSLTR1, CYSLTR2, ACKR1, EDNRA, EDNRB, FPR1, FPR2, FPR2, GPR17, GPR32, GPR33, PTGDR2, C5AR2, CXCR1, CXCR2, LTB4R, LTB4R2, PLAUR, PLXNA1, PLXNA2, PLXNA3, PLXNA4, PLXNB1, PLXNB2, PLXNB3, PLXNC1, PLXND1, PTAFR, ROBO1, ROBO2, ROBO3, RXFP3, XCR1                                                                                                                                                                                                                                                                                                                                                                                                                                                                                                                                                                                                                                                                    |
| Chemokines          | C3, C5, CAMP, CCL1, CCL11, CCL13, CCL14, CCL15, CCL16, CCL17, CCL18, CCL19, CCL2, CCL20, CCL21, CCL22, CCL23, CCL24, CCL25, CCL26, CCL27, CCL28, CCL3, CCL3L1, CCL3P1, CCL3L3, CCL4, CCL4L2, CCL4L1, CCL5, CCL7, CCL8, CKLF, CMA1, CTSG, CX3CL1, CXCL1, CXCL10, CXCL11, CXCL12, CXCL13, CXCL14, CXCL16, CXCL17, CXCL2, CXCL3, CXCL5, CXCL6, CXCL9, CCN1, DEFA1, DEFA3, DEFA5, DEFB1, DEFB103B, DEFB104A, DEFB4A, EDN1, EDN2, EDN3, FGF10, FGF2, HTN3, CXCL8, LECT2, PF4, PF4V1, PLAU, PPBP, PPBPP1, PROK2, RNASE2, SAA1, SAA2, SBDS, SEMA3A, SEMA3B, SEMA3C, SEMA3D, SEMA3E, SEMA3F, SEMA3G, SEMA4A, SEMA4B, SEMA4C, SEMA4D, SEMA4F, SEMA4G, SEMA5A, SEMA5B, SEMA6A, SEMA6B, SEMA6C, SEMA6D, SEMA7A, SLIT1, SLIT2, TNC, TYMP, XCL1, XCL2                                                                                                                                                                                                                                                                                                                                                                                                                                                                                                                                                                                                                                                                                                                                                                                                                                                                                                                                                                                                    |
| Cytokine Receptors  | ACVR1B, ACVR1C, ACVR2A, ACVR2B, ACVRL1, ADCYAP1R1, ADIPOR1, ADIPOR2, ADRB1, ADRB2, AGTR1, AGTR2, AMHR2, ANGPT1, ANGPT4, ANGPTL1, ANGPTL2, ANGPTL3, ANGPTL4, ANGPTL6, APLNR, AR, AVPR1A, AVPR1B, AVPR2, BMPR1A, BMPR1B, BMPR2, BRD8, C3AR1, C5AR1, CALCR, CALCRL, ACKR2, CCR1, CCR10, CCR3, CCR4, CCR5, CCR6, CCR7, CCR8, CCR9, ACKR4, CCRL2, CD40, CMKLR1, CNTFR, CRHR1, CRHR2, CRIM1, CRLF1, CRLF2, CRLF3, CSF1R, CSF2RA, CSF2RB, CSF3R, CX3CR1, CXCR3, CXCR4, CXCR5, CXCR6, ACKR3, CYSLTR1, CYSLTR2, ACKR1, EDNRA, EDNRB, EGFR, ENG, EPOR, ESR1, ESR2, ESRRA, ESRRB, ESRRG, FGFR1, FGFR2, FGFR3, FGFR4, FGFR4, FGFR4, FGFR4, FGFR4, FLT1, FLT3, FLT4, FPR1, FPR2, FPR2, FSHR, GALR2, GALR3, GCGR, GHR, GHRHR, GHSR, GIPR, GLP1R, GLP2R, GNRHR, GPER1, GPR17, GPR32, GPR33, PTGDR2, C5AR2, HNF4A, HNF4G, HTR3A, HTR3B, HTR3C, HTR3D, HTR3E, IFNAR1, IFNAR2, IFNGR1, IFNGR2, IGF1R, IGF2R, IL10RA, IL10RB, IL11RA, IL12RB1, IL12RB2, IL13RA1, IL13RA2, IL15RA, IL2RB, IL17RA, IL17RB, IL17RC, IL17RD, IL17RE, IL18R1, IL18RAP, IL1R1, IL1R2, IL1RAP, IL1RL1, IL1RL2, IL20RA, IL20RB, IL21R, IL22RA1, IL22RA2, IL23R, IL27RA, IFNLR1, IL2RA, IL2RB, IL2RG, IL31RA, IL3RA, IL4R, IL5RA, IL6R, IL7R, CXCR1, CXCR2, IL9R, INSR, KDR, LEPR, LGR4, LGR5, LGR6, LHCGR, LIFR, LTB4R, LTB4R2, LTBR, MC1R, MC2R, MC3R, MC4R, MCHR1, MCHR2, MET, MLNR, MPL, MTNR1A, MTNR1B, NGFR, NMBR, NPR1, NPR3, NR0B1, NR0B2, NR1D1, NR1D2, NR1H2, NR1H3, NR1H4, NR1I2, NR1I3, NR2C1, NR2C2, NR2E1, NR2E3, NR2F1, NR2F2, NR2F6, NR3C1, NR3C2, NR4A1, NR4A2, NR4A3, NR5A1, NR5A2, NR6A1, NRP1, NRP2, OGR1, OPRD1, OPRK1, OPRL1, OPRM1, OSMR, OXTR, PGR, PGRMC2, PLAUR, PLXNA1, PLXNA2, PLXNA3, PLXNA4, PLXNB1, PLXNB2, PLXNB3, PLXNC1, PLXND1, PPARA, PPARG, PPARG, |



| Gene sets name | Genes                                                                                                                                                                                                                                                                                                                                                                                                                                                                                                                                                                                                                                                                                                                                                                                                                                                                                                                                                                                                                                                                                                                                                                                                                                                                                                                                                                                                                                                                                                                                                                                                                                                                                                                                                                                                                                                                                                                                                                                                                                                                                                                                                                                                                                                                                                                                                                                                                                                                                                                                                                                                                                                                                                                                                                                                                                                                                                                                                                                                                                                                                                                                                                                                                                                                                                                                                                                                                                                                                                                                      |
|----------------|--------------------------------------------------------------------------------------------------------------------------------------------------------------------------------------------------------------------------------------------------------------------------------------------------------------------------------------------------------------------------------------------------------------------------------------------------------------------------------------------------------------------------------------------------------------------------------------------------------------------------------------------------------------------------------------------------------------------------------------------------------------------------------------------------------------------------------------------------------------------------------------------------------------------------------------------------------------------------------------------------------------------------------------------------------------------------------------------------------------------------------------------------------------------------------------------------------------------------------------------------------------------------------------------------------------------------------------------------------------------------------------------------------------------------------------------------------------------------------------------------------------------------------------------------------------------------------------------------------------------------------------------------------------------------------------------------------------------------------------------------------------------------------------------------------------------------------------------------------------------------------------------------------------------------------------------------------------------------------------------------------------------------------------------------------------------------------------------------------------------------------------------------------------------------------------------------------------------------------------------------------------------------------------------------------------------------------------------------------------------------------------------------------------------------------------------------------------------------------------------------------------------------------------------------------------------------------------------------------------------------------------------------------------------------------------------------------------------------------------------------------------------------------------------------------------------------------------------------------------------------------------------------------------------------------------------------------------------------------------------------------------------------------------------------------------------------------------------------------------------------------------------------------------------------------------------------------------------------------------------------------------------------------------------------------------------------------------------------------------------------------------------------------------------------------------------------------------------------------------------------------------------------------------------|
| Cytokines      | <p>PRLHR, PRLR, PTAFR, PTGDR, PTGDS, PTGER1, PTGER2, PTGER3, PTGER4, PTGFR, PTH1R, PTH2R, RARA, RARB, RARG, ROBO1, ROBO2, ROBO3, RORA, ROXB, RORC, RXFP1, RXFP2, RXFP3, RXRA, RXRB, RXRG, S1PR1, S1PR2, SCTR, SDC1, SDC2, SDC3, SDC4, SORT1, SSTR1, SSTR2, SSTR5, ST2, TACR1, TEK, TGFB1, TGFB2, TGFB3, THRA, THRB, TIE1, TNFRSF10A, TNFRSF10B, TNFRSF10C, TNFRSF10D, TNFRSF11A, TNFRSF12A, TNFRSF13B, TNFRSF13C, TNFRSF14, TNFRSF17, TNFRSF18, TNFRSF19, TNFRSF1A, TNFRSF1B, TNFRSF21, TNFRSF25, TNFRSF4, TNFRSF6B, TNFRSF8, TNFRSF9, TRHR, TSHR, TUBB3, VDR, VIPR1, VIPR2, XCR1</p> <p>ADIPOQ, ADM, ADM2, AGRP, AGT, AMBN, AMELX, AMH, ANGPTL5, ANGPTL7, APLN, AREG, MANF, CDNF, ARTN, AVP, AZU1, BDNF, BMP1, BMP10, BMP15, BMP2, BMP3, BMP4, BMP5, BMP6, BMP7, BMP8A, BMP8B, BTC, MYDGF, C3, C5, CALCA, CALCB, CAMP, CAT, CCK, CCL1, CCL11, CCL13, CCL14, CCL15-CCL14, CCL15, CCL16, CCL17, CCL18, CCL19, CCL2, CCL20, CCL21, CCL22, CCL23, CCL24, CCL25, CCL26, CCL27, CCL28, CCL3, CCL3L1, CCL3P1, CCL3L3, CCL4, CCL4L2, CCL4L1, CCL5, CCL7, CCL8, CD320, CD40LG, CD70, ADA2, CER1, CGA, CGB3, CGB1, CGB2, CGB5, CGB7, CGB8, CHGA, CHGB, CKLF, CLCF1, CLEC11A, CMA1, CMTM1, CMTM2, CMTM3, CMTM4, CMTM5, CMTM6, CMTM7, CMTM8, CNTF, CORT, CRH, CSF1, CSF2, CSF3, CSH1, CSH2, CSHL1, CSPG5, CTF1, CCN2, CTSB, CX3CL1, CXCL1, CXCL10, CXCL11, CXCL12, CXCL13, CXCL14, CXCL16, CXCL17, CXCL2, CXCL3, CXCL5, CXCL6, CXCL9, CCN1, DEFA1, DEFA3, DEFA5, DEFB1, DEFB103B, DEFB104A, DEFB4A, DKK1, EBI3, EDN1, EDN2, EDN3, EGF, EPGN, EPO, EREG, ESM1, FAM3B, FAM3C, FAM3D, FASLG, FGF1, FGF10, FGF11, FGF12, FGF13, FGF14, FGF16, FGF17, FGF18, FGF19, FGF2, FGF20, FGF21, FGF22, FGF23, FGF3, FGF4, FGF5, FGF6, FGF7, FGF8, FGF9, VEGFD, FIGLN2, FLT3LG, FSHB, GAL, GALP, GAST, GCG, GDF1, GDF10, GDF11, GDF15, GDF2, GDF3, GDF5, GDF6, GDF7, GDF9, GDNF, GH1, GH2, GHRH, GHRL, GIP, GKN1, GMFB, GMFG, GNRH1, GNRH2, GPHA2, GPHB5, GPI, GREM1, GREM2, GRN, GRP, GUCA2A, HAMP, HBEGF, HDGF, HDGFL3, HGF, HTN3, IAPP, IFNA1, IFNA10, IFNA13, IFNA14, IFNA16, IFNA17, IFNA2, IFNA21, IFNA4, IFNA5, IFNA6, IFNA7, IFNA8, IFNB1, IFNE, IFNG, IFNK, IFNW1, IGF1, IGF2, IL10, IL11, IL12A, IL12B, IL13, IL15, IL16, IL17A, IL17B, IL17C, IL17D, IL17F, IL18, IL19, IL1A, IL1B, IL1F10, IL36RN, IL36A, IL37, IL36B, IL36G, IL1RN, IL2, IL20, IL21, IL22, IL23A, IL24, IL25, IL26, IL27, IFNL2, IFNL3, IFNL1, IL3, IL31, IL32, IL33, IL34, IL4, IL5, IL6, IL6ST, IL7, CXCL8, IL9, INHA, INHBA, INHBB, INHBC, INHBE, INS, INS-IGF2, INSL3, INSL4, INSL5, INSL6, JAG1, JAG2, FGF7P6, FGF7P3, KITLG, KL, LACRT, LECT2, LEFTY1, LEFTY2, LEP, LHB, LIF, LRSAM1, LTA, LTB, LTBP1, LTBP2, LTBP3, LTBP4, MDK, MIA, MIF, MLN, MSTN, NAMPT, NDP, NENF, NGF, NMB, NODAL, CCN3, NPFF, NPPA, NPPB, NPPC, NPY, NRG1, NRG2, NRG3, NRG4, NRTN, NTF3, NTF4, NTS, NUDT6, OGN, OSGIN1, OSM, OSTN, OXT, ENDOU, PDGFA, PDGFB, PDGFC, PDGFD, PDGFRA, PDGFRB, PDGFR1, PDYN, PENK, PF4, PF4V1, PGF, PLAU, PMCH, PNOC, POMC, PPBP, PPBP1, PPBP2, PPY, PRL, PRLH, PROK1, PROK2, PSPN, PTH, PTH2, PTHLH, PTN, PYY, QRF1, RABEP1, RABEP2, REG1A, RETN, RETNLB, RLN1, RLN2, RLN3, RNASE2, S100A6, SAA1, SAA2, SBDS, SCG2, SCGB3A1, SCT, AIMP1, SECTM1, SEMA3A, SEMA3B, SEMA3C, SEMA3D, SEMA3E, SEMA3F, SEMA3G, SEMA4A, SEMA4B, SEMA4C, SEMA4D, SEMA4F, SEMA4G, SEMA5A, SEMA5B, SEMA6A, SEMA6B, SEMA6C, SEMA6D, SEMA7A, SLIT1, SLIT2, SLURP1, SPP1, SST, STC1, STC2, TAC1, TDGF1, TDGF1P3, TG, TGFA, TGFB1, TGFB2, TGFB3, THPO, TNC, TNF, TNFRSF11B, TNFSF10, TNFSF11, TNFSF12,</p> |

| Gene sets name         | Genes                                                                                                                                                                                                                                                                                                                                                                                                                                                                                                                                                                                                                                                                                                                                                                                                                                                                                                                                                                                                                                                                                                                                                                                                                                                                                                                                                                                                          |
|------------------------|----------------------------------------------------------------------------------------------------------------------------------------------------------------------------------------------------------------------------------------------------------------------------------------------------------------------------------------------------------------------------------------------------------------------------------------------------------------------------------------------------------------------------------------------------------------------------------------------------------------------------------------------------------------------------------------------------------------------------------------------------------------------------------------------------------------------------------------------------------------------------------------------------------------------------------------------------------------------------------------------------------------------------------------------------------------------------------------------------------------------------------------------------------------------------------------------------------------------------------------------------------------------------------------------------------------------------------------------------------------------------------------------------------------|
| Interferons            | TNFSF13, TNFSF13B, TNFSF14, TNFSF15, TNFSF18, TNFSF4, TNFSF8, TNFSF9, TOR2A, TRH, TSHB, TSLP, TXLNA, TYMP, UCN, UCN2, UCN3, UTS2, UTS2B, VEGFA, VEGFB, VEGFC, VGF, VIP, XCL1, XCL2<br>IFNA10, IFNA13, IFNA14, IFNA16, IFNA17, IFNA2, IFNA21, IFNA4, IFNA5, IFNA6, IFNA7, IFNA8, IFNB1, IFNE, IFNG, IFNK, IFNW1                                                                                                                                                                                                                                                                                                                                                                                                                                                                                                                                                                                                                                                                                                                                                                                                                                                                                                                                                                                                                                                                                                 |
| Interleukins           | IL11, IL12A, IL12B, IL13, IL15, IL16, IL17A, IL17B, IL17C, IL17D, IL17F, IL18, IL19, IL1A, IL1B, IL1F10, IL36RN, IL36A, IL37, IL36B, IL36G, IL1RN, IL2, IL20, IL21, IL22, IL23A, IL24, IL25, IL26, IL27, IFNL2, IFNL3, IFNL1, IL3, IL31, IL32, IL33, IL34, IL4, IL5, IL6, IL6ST, IL7, CXCL8, IL9, TXLNA                                                                                                                                                                                                                                                                                                                                                                                                                                                                                                                                                                                                                                                                                                                                                                                                                                                                                                                                                                                                                                                                                                        |
| Interleukins Receptors | IL10RA, IL10RB, IL11RA, IL12RB1, IL12RB2, IL13RA1, IL13RA2, IL15RA, IL2RB, IL17RA, IL17RB, IL17RC, IL17RD, IL17RE, IL18R1, IL18RAP, IL1R1, IL1R2, IL1RAP, IL1RL1, IL1RL2, IL20RA, IL20RB, IL21R, IL22RA1, IL22RA2, IL23R, IL27RA, IFNLR1, IL2RA, IL2RB, IL2RG, IL31RA, IL3RA, IL4R, IL5RA, IL6R, IL7R, CXCR1, CXCR2, IL9R, ST2                                                                                                                                                                                                                                                                                                                                                                                                                                                                                                                                                                                                                                                                                                                                                                                                                                                                                                                                                                                                                                                                                 |
| Natural Killer Cell    | HLA-A, HLA-B, HLA-C, HLA-E, HLA-G, KIR3DL1, KIR3DL2, KIR2DL1, KIR2DL2, KIR2DL3, KIR2DL4, KIR2DL5A, KLRC1, KLRC2, KLRC3, KLRD1, PTPN6, PTPN11, ICAM1, ICAM2, ITGAL, ITGB2, PTK2B, VAV3, VAV1, VAV2, RAC1, RAC2, RAC3, PAK1, MAP2K1, MAP2K2, MAPK1, MAPK3, TNF, CSF2, IFNG, KIR2DS1, KIR2DS3, KIR2DS4, KIR2DS5, NCR2, TYROBP, LCK, FCGR3A, FCGR3B, NCR1, NCR3, FCER1G, CD247, ZAP70, SYK, LCP2, LAT, PLCG1, PLCG2, SH3BP2, PIK3CA, PIK3CB, PIK3CD, PIK3CG, PIK3R5, PIK3R1, PIK3R2, PIK3R3, FYN, SHC2, SHC4, SHC3, SHC1, GRB2, SOS1, SOS2, HRAS, KRAS, NRAS, ARAF, BRAF, RAF1, MICA, MICB, ULBP3, ULBP2, ULBP1, KLRK1, HCST, CD48, CD244, PPP3CA, PPP3CB, PPP3CC, CHP1, PPP3R1, PPP3R2, CHP2, NFAT5, NFATC1, NFATC2, NFATC3, NFATC4, PRKCA, PRKCB, PRKCG, SH2D1B, SH2D1A, IFNGR1, IFNGR2, IFNA1, IFNA2, IFNA4, IFNA5, IFNA6, IFNA7, IFNA8, IFNA10, IFNA13, IFNA14, IFNA16, IFNA17, IFNA21, IFNB1, IFNAR1, IFNAR2, TNFSF10, TNFRSF10D, TNFRSF10C, TNFRSF10B, TNFRSF10A, FASLG, FAS, GZMB, PRF1, CASP3, BID                                                                                                                                                                                                                                                                                                                                                                                                         |
| TCR Signaling Pathway  | CD3D, CD3E, CD3G, CD247, CD4, CD8A, CD8B, PTPRC, LCK, FYN, ZAP70, LCP2, LAT, ITK, TEC, NCK1, NCK2, VAV3, VAV1, VAV2, GRAP2, GRB2, PAK1, PAK2, PAK3, PAK4, PAK6, PAK5, RHOA, CDC42, PPP3CA, PPP3CB, PPP3CC, CHP1, PPP3R1, PPP3R2, CHP2, NFAT5, NFATC1, NFATC2, NFATC3, NFATC4, SOS1, SOS2, HRAS, KRAS, NRAS, FOS, JUN, CARD11, BCL10, MALT1, CHUK, IKBKB, IKBKG, NFKB1, RELA, NFKBIA, NFKBIB, NFKBIE, CD28, ICOS, CD40LG, PIK3R5, PIK3R1, PIK3R2, PIK3R3, PIK3CA, PIK3CB, PIK3CD, PIK3CG, AKT3, AKT1, AKT2, MAP3K8, MAP3K14, PDCD1, CTLA4, PTPN6, CBL, CBLB, IL2, IL4, IL5, IL10, IFNG, CSF2, TNF, CDK4, RASGRP1, PDK1, PLCG1, PRKCC, TRAC, TRAJ1, TRAJ2, TRAJ3, TRAJ4, TRAJ5, TRAJ6, TRAJ7, TRAJ8, TRAJ9, TRAJ10, TRAJ11, TRAJ12, TRAJ13, TRAJ14, TRAJ15, TRAJ16, TRAJ17, TRAJ18, TRAJ19, TRAJ20, TRAJ21, TRAJ22, TRAJ23, TRAJ24, TRAJ25, TRAJ26, TRAJ27, TRAJ28, TRAJ29, TRAJ30, TRAJ31, TRAJ32, TRAJ33, TRAJ34, TRAJ35, TRAJ36, TRAJ37, TRAJ38, TRAJ39, TRAJ40, TRAJ41, TRAJ42, TRAJ43, TRAJ44, TRAJ45, TRAJ46, TRAJ47, TRAJ48, TRAJ49, TRAJ50, TRAJ52, TRAJ53, TRAJ54, TRAJ56, TRAJ57, TRAJ58, TRAJ59, TRAJ61, TRAV1-1, TRAV1-2, TRAV2, TRAV3, TRAV4, TRAV5, TRAV7, TRAV8-1, TRAV8-2, TRAV8-3, TRAV8-4, TRAV8-6, TRAV8-7, TRAV9-1, TRAV9-2, TRAV10, TRAV12-1, TRAV12-2, TRAV12-3, TRAV13-1, TRAV13-2, TRAV14DV4, TRAV16, TRAV17, TRAV18, TRAV19, TRAV20, TRAV21, TRAV22, TRAV23DV6, TRAV24, TRAV25, TRAV26- |

| Gene sets name                 | Genes                                                                                                                                                                                                                                                                                                                                                                                                                                                                                                                                                                                                                                                                                                                                                                                                                                                                                                                                                                                                                                                                                                                                                  |
|--------------------------------|--------------------------------------------------------------------------------------------------------------------------------------------------------------------------------------------------------------------------------------------------------------------------------------------------------------------------------------------------------------------------------------------------------------------------------------------------------------------------------------------------------------------------------------------------------------------------------------------------------------------------------------------------------------------------------------------------------------------------------------------------------------------------------------------------------------------------------------------------------------------------------------------------------------------------------------------------------------------------------------------------------------------------------------------------------------------------------------------------------------------------------------------------------|
| TGF-b Family Members           | 1, TRAV26-2, TRAV27, TRAV29DV5, TRAV30, TRAV34, TRAV35, TRAV36DV7, TRAV38-1, TRAV38-2DV8, TRAV39, TRAV40, TRAV41, TRBC1, TRBC2, TRBD1, TRBD2, TRBJ1-1, TRBJ1-2, TRBJ1-3, TRBJ1-4, TRBJ1-5, TRBJ1-6, TRBJ2-1, TRBJ2-2, TRBJ2-3, TRBJ2-4, TRBJ2-5, TRBJ2-6, TRBJ2-7, TRBV2, TRBV3-1, TRBV4-1, TRBV4-2, TRBV4-3, TRBV5-1, TRBV5-4, TRBV5-5, TRBV5-6, TRBV5-7, TRBV5-8, TRBV6-1, TRBV6-2, TRBV6-3, TRBV6-4, TRBV6-5, TRBV6-6, TRBV6-7, TRBV6-8, TRBV6-9, TRBV7-2, TRBV7-3, TRBV7-4, TRBV7-6, TRBV7-7, TRBV7-8, TRBV7-9, TRBV9, TRBV10-1, TRBV10-2, TRBV10-3, TRBV11-1, TRBV11-2, TRBV11-3, TRBV12-3, TRBV12-4, TRBV12-5, TRBV13, TRBV14, TRBV15, TRBV16, TRBV17, TRBV18, TRBV19, TRBV20-1, TRBV24-1, TRBV25-1, TRBV27, TRBV28, TRBV29-1, TRBV30, TRDC, TRDD1, TRDD2, TRDD3, TRDJ1, TRDJ2, TRDJ3, TRDJ4, TRDV1, TRDV2, TRDV3, TRGV9, TRGV8, TRGV5, TRGV4, TRGV3, TRGV2, TRGJP2, TRGJP1, TRGJP, TRGJ2, TRGJ1, TRGC2, TRGC1, TRAV6<br>BMP1, BMP10, BMP15, BMP2, BMP3, BMP4, BMP5, BMP6, BMP7, BMP8A, BMP8B, GDF1, GDF10, GDF11, GDF15, GDF2, GDF3, GDF5, GDF6, GDF7, GDF9, GDNF, INHA, INHBA, INHBB, INHBC, INHBE, LEFTY1, LEFTY2, NODAL, TGFB1, TGFB2, TGFB3 |
| TGF-b Family Members Receptors | ACVR1B, ACVR1C, ACVR2A, ACVR2B, ACVRL1, AMHR2, BMPR1A, BMPR1B, BMPR2, TGFBR1, TGFBR2, TGFBR3                                                                                                                                                                                                                                                                                                                                                                                                                                                                                                                                                                                                                                                                                                                                                                                                                                                                                                                                                                                                                                                           |
| TNF Family Members             | TNFRSF11B, TNFSF10, TNFSF11, TNFSF12, TNFSF13, TNFSF13B, TNFSF14, TNFSF15, TNFSF18, TNFSF4, TNFSF8, TNFSF9                                                                                                                                                                                                                                                                                                                                                                                                                                                                                                                                                                                                                                                                                                                                                                                                                                                                                                                                                                                                                                             |
| TNF Family Members Receptors   | TNFRSF10B, TNFRSF10C, TNFRSF10D, TNFRSF11A, TNFRSF12A, TNFRSF13B, TNFRSF13C, TNFRSF14, TNFRSF17, TNFRSF18, TNFRSF19, TNFRSF1A, TNFRSF1B, TNFRSF21, TNFRSF25, TNFRSF4, TNFRSF6B, TNFRSF8, TNFRSF9                                                                                                                                                                                                                                                                                                                                                                                                                                                                                                                                                                                                                                                                                                                                                                                                                                                                                                                                                       |

**Supplementary Table 3** Lipid metabolism gene sets from MSigDB database (<https://www.gsea-msigdb.org/gsea/msigdb>).

| Gene sets name                      | Genes                                                                                                                                                                                                                                                                                                                                                                                                                                                                                                                                                                                                                                                                                                                                                                                                                                                                                                                                                                                                                                                                                                                           |
|-------------------------------------|---------------------------------------------------------------------------------------------------------------------------------------------------------------------------------------------------------------------------------------------------------------------------------------------------------------------------------------------------------------------------------------------------------------------------------------------------------------------------------------------------------------------------------------------------------------------------------------------------------------------------------------------------------------------------------------------------------------------------------------------------------------------------------------------------------------------------------------------------------------------------------------------------------------------------------------------------------------------------------------------------------------------------------------------------------------------------------------------------------------------------------|
| HALLMARK FATTY ACID METABOLISM      | AADAT, ACAA1, ACAA2, ACADL, ACADM, ACADS, ACADVL, ACAT2, ACO2, ACOT2, ACOT8, ACOX1, ACSL1, ACSL4, ACSL5, ACSM3, ACSS1, ADH1C, ADH7, ADIPOR2, ADSL, ALAD, ALDH1A1, ALDH3A1, ALDH3A2, ALDH9A1, ALDOA, AOC3, APEX1, AQP7, AUH, BCKDHB, BLVRA, BMPR1B, BPHL, CA2, CA4, CA6, CBR1, CBR3, CD1D, CD36, CEL, CIDEA, CPOX, CPT1A, CPT2, CRAT, CRYZ, CYP1A1, CYP4A11, CYP4A22, D2HGDH, DECR1, DHCR24, DLD, DLST, ECH1, ECHS1, ECI1, ECI2, EHHADH, ELOVL5, ENO2, ENO3, EPHX1, ERP29, ETFDH, FABP1, FABP2, FASN, FH, FMO1, G0S2, GABARAPL1, GAD2, GAPDHS, GCDH, GLUL, GPD1, GPD2, GRHPR, GSTZ1, H2AZ1, HADH, HADHB, HAO2, HCCS, HIBCH, HMGCL, HMGCS1, HMGCS2, HPGD, HSD17B10, HSD17B11, HSD17B4, HSD17B7, HSDL2, HSP90AA1, HSPH1, IDH1, IDH3B, IDH3G, IDI1, IL4I1, INMT, KMT5A, LDHA, LGALS1, LTC4S, MAOA, MCEE, MDH1, MDH2, ME1, METAP1, MGLL, MIF, MIX23, MLYCD, NBN, NCAPH2, NSDHL, NTHL1, ODC1, OSTC, PCBD1, PDHA1, PDHB, PPARA, PRDX6, PSME1, PTPRG, PTS, RAP1GDS1, RDH11, RDH16, REEP6, RETSAT, S100A10, SDHA, SDHC, SDHD, SERINC1, SLC22A5, SMS, SUCLA2, SUCLG1, SUCLG2, TDO2, TP53INP2, UBE2L6, UGDH, UROD, UROS, VNN1, XIST, YWHAH |
| KEGG FATTY ACID METABOLISM          | ACAA1, ACAA2, ACADL, ACADM, ACADS, ACADSB, ACADVL, ACAT1, ACAT2, ACOX1, ACOX3, ACSL1, ACSL3, ACSL4, ACSL5, ACSL6, ADH1A, ADH1B, ADH1C, ADH4, ADH5, ADH6, ADH7, ALDH1B1, ALDH2, ALDH3A2, ALDH7A1, ALDH9A1, CPT1A, CPT1B, CPT1C, CPT2, CYP4A11, CYP4A22, ECHS1, ECI1, ECI2, EHHADH, GCDH, HADH, HADHA, HADHB                                                                                                                                                                                                                                                                                                                                                                                                                                                                                                                                                                                                                                                                                                                                                                                                                      |
| KEGG GLYCEROLIPID METABOLISM        | AGK, AGPAT1, AGPAT2, AGPAT3, AGPAT4, AKR1A1, AKR1B1, ALDH1B1, ALDH2, ALDH3A2, ALDH7A1, ALDH9A1, AWAT2, CEL, DGAT1, DGAT2, DGKA, DGKB, DGKD, DGKE, DGKG, DGKH, DGKI, DGKQ, DGKZ, GK, GK2, GLA, GLYCTK, GPAM, GPAT2, GPAT3, GPAT4, LCLAT1, LIPC, LIPF, LIPG, LPL, MBOAT1, MBOAT2, MGLL, PLPP1, PLPP2, PLPP3, PNLIP, PNLIPRP1, PNLIPRP2, PNPLA3, TKFC                                                                                                                                                                                                                                                                                                                                                                                                                                                                                                                                                                                                                                                                                                                                                                              |
| KEGG GLYCEROPHOSPHOLIPID METABOLISM | ACHE, ADPRM, AGPAT1, AGPAT2, AGPAT3, AGPAT4, CDIPT, CDS1, CDS2, CHAT, CHKA, CHKB, CHPT1, CRLS1, DGKA, DGKB, DGKD, DGKE, DGKG, DGKH, DGKI, DGKQ, DGKZ, ETNK1, ETNK2, GNPAT, GPAM, GPAT2, GPAT3, GPAT4, GPD1, GPD1L, GPD2, JMJD7-PLA2G4B, LCAT, LCLAT1, LPCAT1, LPCAT2, LPCAT3, LPCAT4, LPGAT1, LYPLA1, LYPLA2, MBOAT1, MBOAT2, MBOAT7, PCYT1A, PCYT1B, PCYT2, PEMT, PGS1, PHOSPHO1,                                                                                                                                                                                                                                                                                                                                                                                                                                                                                                                                                                                                                                                                                                                                              |

| Gene sets name                        | Genes                                                                                                                                                                                                                                                                                                                                                                                                                                                                                                                                                                                                                                                                                                                                                                                                                                                                                                                                                                                                                                                                                                                                                                                                                                                                                                                                                                                                                                                              |
|---------------------------------------|--------------------------------------------------------------------------------------------------------------------------------------------------------------------------------------------------------------------------------------------------------------------------------------------------------------------------------------------------------------------------------------------------------------------------------------------------------------------------------------------------------------------------------------------------------------------------------------------------------------------------------------------------------------------------------------------------------------------------------------------------------------------------------------------------------------------------------------------------------------------------------------------------------------------------------------------------------------------------------------------------------------------------------------------------------------------------------------------------------------------------------------------------------------------------------------------------------------------------------------------------------------------------------------------------------------------------------------------------------------------------------------------------------------------------------------------------------------------|
| KEGG SPHINGOLIPID METABOLISM          | PISD, PLA2G10, PLA2G12A, PLA2G12B, PLA2G15, PLA2G1B, PLA2G2A, PLA2G2C, PLA2G2D, PLA2G2E, PLA2G2F, PLA2G3, PLA2G4A, PLA2G4B, PLA2G4E, PLA2G5, PLA2G6, PLD1, PLD2, PLPP1, PLPP2, PLPP3, PTDSS1, PTDSS2, TFAZZIN                                                                                                                                                                                                                                                                                                                                                                                                                                                                                                                                                                                                                                                                                                                                                                                                                                                                                                                                                                                                                                                                                                                                                                                                                                                      |
| REACTOME FATTY ACID METABOLISM        | ACER1, ACER2, ACER3, ARSA, ASAH1, ASAH2, B4GALT6, CERK, DEGS1, DEGS2, ENPP7, GAL3ST1, GALC, GBA, GLA, GLB1, KDSR, NEU1, NEU2, NEU3, NEU4, PLPP1, PLPP2, PLPP3, SGMS1, SGMS2, SGPL1, SGPP1, SGPP2, SMPD1, SMPD2, SMPD3, SMPD4, SPHK1, SPHK2, SPTLC1, SPTLC2, UGCG, UGT8                                                                                                                                                                                                                                                                                                                                                                                                                                                                                                                                                                                                                                                                                                                                                                                                                                                                                                                                                                                                                                                                                                                                                                                             |
| REACTOME GLYCOSPHINGOLIPID METABOLISM | ABCC1, ABCD1, ACAA1, ACAA2, ACACA, ACACB, ACAD10, ACAD11, ACADL, ACADM, ACADS, ACADVL, ACBD4, ACBD5, ACBD6, ACBD7, ACLY, ACOT1, ACOT11, ACOT12, ACOT13, ACOT2, ACOT4, ACOT6, ACOT7, ACOT8, ACOT9, ACOX1, ACOX2, ACOX3, ACOXL, ACSBG1, ACSBG2, ACSF2, ACSF3, ACSL1, ACSL3, ACSL4, ACSL5, ACSL6, ACSM3, ACSM6, AKR1C3, ALDH3A2, ALOX12, ALOX12B, ALOX15, ALOX15B, ALOX5, ALOX5AP, ALOXE3, AMACR, AWAT1, CBR1, CBR4, CPT1A, CPT1B, CPT2, CRAT, CROT, CYP1A1, CYP1A2, CYP1B1, CYP2C19, CYP2C8, CYP2C9, CYP2J2, CYP2U1, CYP4A11, CYP4A22, CYP4B1, CYP4F11, CYP4F2, CYP4F22, CYP4F3, CYP4F8, CYP8B1, DBI, DECR1, DECR2, DPEP1, DPEP2, DPEP3, ECHS1, ECI1, ECI2, EHHADH, ELOVL1, ELOVL2, ELOVL3, ELOVL4, ELOVL5, ELOVL6, ELOVL7, EPHX2, FAAH, FAAH2, FADS1, FADS2, FASN, GGT1, GGT5, GPX1, GPX2, GPX4, HACD1, HACD2, HACD3, HACD4, HACL1, HADH, HADHA, HADHB, HAO2, HPGD, HPGDS, HSD17B12, HSD17B3, HSD17B4, HSD17B8, HTD2, LTA4H, LTC4S, MAPKAPK2, MCAT, MCEE, MECR, MID1IP1, MLYCD, MMAA, MMUT, MORC2, NDUFAB1, NUDT19, NUDT7, OLAH, PCCA, PCCB, PCTP, PECR, PHYH, PLA2G4A, PON1, PON2, PON3, PPARD, PPT1, PPT2, PRKAA2, PRKAB2, PRKAG2, PRXL2B, PTGDS, PTGES, PTGES2, PTGES3, PTGIS, PTGR1, PTGR2, PTGS1, PTGS2, RXRA, SCD, SCD5, SCP2, SLC22A5, SLC25A1, SLC25A17, SLC25A20, SLC27A2, SLC27A3, TBXAS1, TECR, TECRL, THEM4, THEM5, THRSP, CYP2A13, CYP2A7, CYP2B6, CYP2D6, CYP2F1, CYP2J2, CYP4A11, CYP4A22, CYP4B1, CYP4F11, CYP4F12, CYP4F2, CYP4F22, CYP4F3, CYP4F8 |
| REACTOME GLYCOSPHINGOLIPID METABOLISM | ARSA, ARSB, ARSD, ARSF, ARSG, ARSH, ARSI, ARSJ, ARSK, ARSL, ASAH1, ASAH2, B3GALNT1, B4GALNT1, CERK, CPTP, CTSA, ENPP7, ESYT1, ESYT2, ESYT3, GALC, GBA, GBA2, GLA, GLB1, GLB1L, GLTP, GM2A, HEXA, HEXB, NEU1, NEU2, NEU3, NEU4, PSAP, SMPD1, SMPD2, SMPD3, SMPD4, STS, SUMF1, SUMF2,                                                                                                                                                                                                                                                                                                                                                                                                                                                                                                                                                                                                                                                                                                                                                                                                                                                                                                                                                                                                                                                                                                                                                                                |

| Gene sets name                | Genes                                                                                                                                                                                                                                                                                                                                                                                                                                                                                                                                                                                                                                                                                                                                                                                                                                                                                                                                                                                                                                                                                                                                                                                                                                                                                                                                                                                                                                                                                                                                                                                                                                                                                                                                                                                                                                                                                                                                                                                                                                                                                                                                                                                                                                                                                                                                |
|-------------------------------|--------------------------------------------------------------------------------------------------------------------------------------------------------------------------------------------------------------------------------------------------------------------------------------------------------------------------------------------------------------------------------------------------------------------------------------------------------------------------------------------------------------------------------------------------------------------------------------------------------------------------------------------------------------------------------------------------------------------------------------------------------------------------------------------------------------------------------------------------------------------------------------------------------------------------------------------------------------------------------------------------------------------------------------------------------------------------------------------------------------------------------------------------------------------------------------------------------------------------------------------------------------------------------------------------------------------------------------------------------------------------------------------------------------------------------------------------------------------------------------------------------------------------------------------------------------------------------------------------------------------------------------------------------------------------------------------------------------------------------------------------------------------------------------------------------------------------------------------------------------------------------------------------------------------------------------------------------------------------------------------------------------------------------------------------------------------------------------------------------------------------------------------------------------------------------------------------------------------------------------------------------------------------------------------------------------------------------------|
| REACTOME METABOLISM OF LIPIDS | UGCG, UGT8<br>AACs, ABCA1, ABCB11, ABCB4, ABCC1, ABCC3, ABCD1, ABHD3, ABHD4, ABHD5, ACAA1, ACAA2, ACACA, ACACB, ACAD10, ACAD11, ACADL, ACADM, ACADS, ACADVL, ACAT1, ACAT2, ACBD4, ACBD5, ACBD6, ACBD7, ACER1, ACER2, ACER3, ACHE, ACLY, ACOT1, ACOT11, ACOT12, ACOT13, ACOT2, ACOT4, ACOT6, ACOT7, ACOT8, ACOT9, ACOX1, ACOX2, ACOX3, ACOXL, ACP6, ACSBG1, ACSBG2, ACSF2, ACSF3, ACSL1, ACSL3, ACSL4, ACSL5, ACSL6, ACSM3, ACSM6, ACSS3, AGK, AGMO, AGPAT1, AGPAT2, AGPAT3, AGPAT4, AGPAT5, AGPS, AGT, AHR, AHRr, AKR1B1, AKR1B15, AKR1C1, AKR1C2, AKR1C3, AKR1C4, AKR1D1, ALAS1, ALB, ALDH3A2, ALDH3B1, ALDH3B2, ALOX12, ALOX12B, ALOX15, ALOX15B, ALOX5, ALOX5AP, ALOXE3, ALPI, AMACR, ANGPTL4, ANKRD1, APOA1, APOA2, APOA5, ARF1, ARF3, ARNT, ARNT2, ARNTL, ARSA, ARSB, ARSD, ARSF, ARSG, ARSH, ARSI, ARSJ, ARSK, ARSL, ARV1, ASAH1, ASAH2, AWAT1, AWAT2, B3GALNT1, B4GALNT1, BAAT, BCHE, BDH1, BDH2, BMX, CARM1, CAV1, CBR1, CBR4, CCNC, CD36, CDIPT, CDK19, CDK8, CDS1, CDS2, CEPT1, CERK, CERS1, CERS2, CERS3, CERS4, CERS5, CERS6, CERT1, CGA, CH25H, CHAT, CHD9, CHKA, CHKB, CHPT1, CIDEA, CIDEc, CLOCK, CPNE1, CPNE3, CPNE6, CPNE7, CPT1A, CPT1B, CPT2, CPTP, CRAT, CREBBP, CRLS1, CROT, CSNK1G2, CSNK2A1, CSNK2A2, CSNK2B, CTSa, CUBN, CYP11A1, CYP11B1, CYP11B2, CYP17A1, CYP19A1, CYP1A1, CYP1A2, CYP1B1, CYP21A2, CYP24A1, CYP27A1, CYP27B1, CYP2C19, CYP2C8, CYP2C9, CYP2D6, CYP2E1, CYP2J2, CYP2R1, CYP2U1, CYP39A1, CYP3A4, CYP46A1, CYP4A11, CYP4A22, CYP4B1, CYP4F11, CYP4F2, CYP4F22, CYP4F3, CYP4F8, CYP51A1, CYP7A1, CYP7B1, CYP8B1, DBI, DDHD1, DDHD2, DECR1, DECR2, DEGS1, DEGS2, DGAT1, DGAT2, DGAT2L6, DHCR24, DHCR7, DHRS7B, DPEP1, DPEP2, DPEP3, EBP, ECHS1, ECI1, ECI2, EHHADH, ELOVL1, ELOVL2, ELOVL3, ELOVL4, ELOVL5, ELOVL6, ELOVL7, ENPP6, ENPP7, EP300, EPHX2, ESRRA, ESYT1, ESYT2, ESYT3, ETNK1, ETNK2, ETNPPL, FA2H, FAAH, FAAH2, FABP1, FABP12, FABP2, FABP3, FABP4, FABP5, FABP6, FABP7, FABP9, FADS1, FADS2, FAM120B, FAR1, FAR2, FASN, FDFT1, FDPS, FDX1, FDX2, FDXR, FHL2, FIG4, FITM1, FITM2, G0S2, GALC, GBA, GBA2, GC, GDE1, GDPD1, GDPD3, GDPD5, GGPS1, GGT1, GGT5, GK, GK2, GK3P, GLA, GLB1, GLB1L, GLIPR1, GLTP, GM2A, GNPAT, GPAM, GPAT2, GPAT3, GPAT4, GPCPD1, GPD1, GPD1L, GPD2, GPS2, GPX1, GPX2, GPX4, GRHL1, GSTM4, HACD1, HACD2, HACD3, HACD4, HAcl1, HADH, HADHA, HADHB, HAO2, |

| Gene sets name | Genes                                                                                                                                                                                                                                                                                                                                                                                                                                                                                                                                                                                                                                                                                                                                                                                                                                                                                                                                                                                                                                                                                                                                                                                                                                                                                                                                                                                                                                                                                                                                                                                                                                                                                                                                                                                                                                                                                                                                                                                                                                                                                                                                                                                                                                                                                                                                                             |
|----------------|-------------------------------------------------------------------------------------------------------------------------------------------------------------------------------------------------------------------------------------------------------------------------------------------------------------------------------------------------------------------------------------------------------------------------------------------------------------------------------------------------------------------------------------------------------------------------------------------------------------------------------------------------------------------------------------------------------------------------------------------------------------------------------------------------------------------------------------------------------------------------------------------------------------------------------------------------------------------------------------------------------------------------------------------------------------------------------------------------------------------------------------------------------------------------------------------------------------------------------------------------------------------------------------------------------------------------------------------------------------------------------------------------------------------------------------------------------------------------------------------------------------------------------------------------------------------------------------------------------------------------------------------------------------------------------------------------------------------------------------------------------------------------------------------------------------------------------------------------------------------------------------------------------------------------------------------------------------------------------------------------------------------------------------------------------------------------------------------------------------------------------------------------------------------------------------------------------------------------------------------------------------------------------------------------------------------------------------------------------------------|
|                | <p>HDAC3, HELZ2, HEXA, HEXB, HILPDA, HMGCL, HMGCLL1, HMGCR, HMGCS1, HMGCS2, HPGD, HPGDS, HSD11B1, HSD11B2, HSD17B1, HSD17B11, HSD17B12, HSD17B13, HSD17B14, HSD17B2, HSD17B3, HSD17B4, HSD17B7, HSD17B8, HSD3B1, HSD3B2, HSD3B7, HTD2, IDI1, IDI2, INPP4A, INPP4B, INPP5D, INPP5E, INPP5F, INPP5J, INPP5K, INPPL1, INSIG1, INSIG2, KDSR, KPNB1, LBR, LCLAT1, LGMN, LHB, LIPE, LIPH, LIPI, LPCAT1, LPCAT2, LPCAT3, LPCAT4, LPGAT1, LPIN1, LPIN2, LPIN3, LRP2, LSS, LTA4H, LTC4S, MAPKAPK2, MBOAT1, MBOAT2, MBOAT7, MBTPS1, MBTPS2, MCAT, MCEE, ME1, MECR, MED1, MED10, MED11, MED12, MED13, MED13L, MED14, MED15, MED16, MED17, MED18, MED19, MED20, MED21, MED22, MED23, MED24, MED25, MED26, MED27, MED28, MED29, MED30, MED31, MED4, MED6, MED7, MED8, MED9, MFSD2A, MGLL, MID1IP1, MIGA1, MIGA2, MLYCD, MMAA, MMUT, MOGAT1, MOGAT2, MOGAT3, MORC2, MSMO1, MTF1, MTM1, MTMR1, MTMR10, MTMR12, MTMR14, MTMR2, MTMR3, MTMR4, MTMR6, MTMR7, MTMR8, MTMR9, MVD, MVK, NCOA1, NCOA2, NCOA3, NCOA6, NCOR1, NCOR2, NDUFAB1, NEU1, NEU2, NEU3, NEU4, NFYA, NFYB, NFYC, NPAS2, NR1D1, NR1H2, NR1H3, NR1H4, NRF1, NSDHL, NUDT19, NUDT7, OCRL, OLAH, ORMDL1, ORMDL2, ORMDL3, OSBP, OSBPL10, OSBPL1A, OSBPL2, OSBPL3, OSBPL5, OSBPL6, OSBPL7, OSBPL8, OSBPL9, OXCT1, OXCT2, PCCA, PCCB, PCTP, PCYT1A, PCYT1B, PCYT2, PDCD6-AHRR, PECR, PEMT, PEX11A, PGS1, PHOSPHO1, PHYH, PI4K2A, PI4K2B, PI4KA, PI4KB, PIAS4, PIK3C2A, PIK3C2B, PIK3C2G, PIK3C3, PIK3CA, PIK3CB, PIK3CD, PIK3CG, PIK3R1, PIK3R2, PIK3R3, PIK3R4, PIK3R5, PIK3R6, PIKFYVE, PIP4K2A, PIP4K2B, PIP4K2C, PIP4P1, PIP5K1A, PIP5K1B, PIP5K1C, PISD, PITPNB, PITPNM1, PITPNM2, PITPNM3, PLA1A, PLA2G10, PLA2G12A, PLA2G15, PLA2G1B, PLA2G2A, PLA2G2D, PLA2G2E, PLA2G2F, PLA2G3, PLA2G4A, PLA2G4B, PLA2G4C, PLA2G4D, PLA2G4E, PLA2G4F, PLA2G5, PLA2G6, PLA2R1, PLAAT1, PLAAT2, PLAAT3, PLAAT4, PLAAT5, PLB1, PLBD1, PLD1, PLD2, PLD3, PLD4, PLD6, PLEKHA1, PLEKHA2, PLEKHA3, PLEKHA4, PLEKHA5, PLEKHA6, PLEKHA8, PLIN1, PLIN2, PLIN3, PLPP1, PLPP2, PLPP3, PLPP6, PMVK, PNPLA2, PNPLA3, PNPLA4, PNPLA5, PNPLA6, PNPLA7, PNPLA8, POMC, PON1, PON2, PON3, PPARA, PPARG, PPARGC1A, PPARGC1B, PPM1L, PPP1CA, PPP1CB, PPP1CC, PPT1, PPT2, PRKAA2, PRKAB2, PRKACA, PRKACB, PRKACG, PRKAG2, PRKD1, PRKD2, PRKD3, PRXL2B, PSAP, PTDSS1, PTDSS2, PTEN, PTGDS, PTGES, PTGES2, PTGES3, PTGIS, PTGR1, PTGR2, PTGS1, PTGS2,</p> |

| Gene sets name                                                     | Genes                                                                                                                                                                                                                                                                                                                                                                                                                                                                                                                                                                                                                                                                                                                                                                                                                                                                                                                                                                                                                                                                                                                                                                                                                                                                                                                                                                                                                                                                                                                                                                                                                                                                                                                                                                                                                                                                  |
|--------------------------------------------------------------------|------------------------------------------------------------------------------------------------------------------------------------------------------------------------------------------------------------------------------------------------------------------------------------------------------------------------------------------------------------------------------------------------------------------------------------------------------------------------------------------------------------------------------------------------------------------------------------------------------------------------------------------------------------------------------------------------------------------------------------------------------------------------------------------------------------------------------------------------------------------------------------------------------------------------------------------------------------------------------------------------------------------------------------------------------------------------------------------------------------------------------------------------------------------------------------------------------------------------------------------------------------------------------------------------------------------------------------------------------------------------------------------------------------------------------------------------------------------------------------------------------------------------------------------------------------------------------------------------------------------------------------------------------------------------------------------------------------------------------------------------------------------------------------------------------------------------------------------------------------------------|
| REACTOME REGULATION OF LIPID METABOLISM BY PPARALPHA               | <p>PTPMT1, PTPN13, RAB14, RAB4A, RAB5A, RAN, RGL1, RORA, RUFY1, RXRA, RXRB, SACM1L, SAMD8, SAR1B, SBF1, SBF2, SC5D, SCAP, SCD, SCD5, SCP2, SEC23A, SEC24A, SEC24B, SEC24C, SEC24D, SELENOI, SERPINA6, SGMS1, SGMS2, SGPL1, SGPP1, SGPP2, SIN3A, SIN3B, SLC10A1, SLC10A2, SLC22A5, SLC25A1, SLC25A17, SLC25A20, SLC27A1, SLC27A2, SLC27A3, SLC27A5, SLC44A1, SLC44A2, SLC44A3, SLC44A4, SLC44A5, SLC51A, SLC51B, SLCO1A2, SLCO1B1, SLCO1B3, SMARCD3, SMPD1, SMPD2, SMPD3, SMPD4, SP1, SPHK1, SPHK2, SPNS2, SPTLC1, SPTLC2, SPTLC3, SPTSSA, SPTSSB, SQLE, SRD5A1, SRD5A2, SRD5A3, SREBF1, SREBF2, STAR, STARD10, STARD3, STARD3NL, STARD4, STARD5, STARD6, STARD7, STS, SULT2A1, SUMF1, SUMF2, SUMO2, SYNJ1, SYNJ2, TAFAZZIN, TBL1X, TBL1XR1, TBXAS1, TECR, TECRL, TGS1, THEM4, THEM5, THRAP3, THRSP, TIAM2, TM7SF2, TMEM86B, TNFAIP8, TNFAIP8L1, TNFAIP8L2, TNFAIP8L3, TNFRSF21, TPTE, TPTE2, TRIB3, TSPO, TSPOAP1, TXNRD1, UBE2I, UGCG, UGT1A9, UGT8, VAC14, VAPA, VAPB, VDR</p> <p>ABCA1, ABCB4, ACADM, ACOX1, ACSL1, AGT, AHR, AHRR, ALAS1, ANGPTL4, ANKRD1, APOA1, APOA2, APOA5, ARNT, ARNT2, ARNTL, CARM1, CCNC, CD36, CDK19, CDK8, CHD9, CLOCK, CPT1A, CPT2, CREBBP, CYP1A1, CYP4A11, CYP7A1, EP300, ESRRA, FABP1, FADS1, FAM120B, FDFT1, FHL2, G0S2, GLIPR1, GPS2, GRHL1, HDAC3, HELZ2, HMGCR, HMGCS1, HMGCS2, ME1, MED1, MED10, MED11, MED12, MED13, MED13L, MED14, MED15, MED16, MED17, MED18, MED19, MED20, MED21, MED22, MED23, MED24, MED25, MED26, MED27, MED28, MED29, MED30, MED31, MED4, MED6, MED7, MED8, MED9, MTF1, NCOA1, NCOA2, NCOA3, NCOA6, NCOR1, NCOR2, NFYA, NFYB, NFYC, NPAS2, NR1D1, NR1H2, NR1H3, NR1H4, NRF1, PDCD6-AHRR, PEX11A, PLIN2, PPARA, PPARG, PPARGC1A, PPARGC1B, RGL1, RORA, RXRA, RXRB, SIN3A, SIN3B, SLC27A1, SMARCD3, SP1, SREBF1, SREBF2, SULT2A1, TBL1X, TBL1XR1, TGS1, THRAP3, TIAM2, TNFRSF21, TRIB3, TXNRD1, UGT1A9</p> |
| WP CHOLESTEROL METABOLISM WITH BLOCH AND KANDUTSCHRUSSELL PATHWAYS | <p>ABCA1, ABCG1, ACAT2, ACOT2, ACSL1, ACSL3, ACSL4, CH25H, CYP27A1, CYP46A1, CYP51A1, DHCR24, DHCR7, EBP, ELOVL2, ELOVL3, ELOVL4, ELOVL5, FADS1, FADS2, FASN, FDFT1, FDPS, GGPS1, HMGCR, HMGCS1, HMGCS2, HSD17B7, IDI1, LBR, LSS, MIR1908, MSMO1, MVD, MVK, MYLIP, NR1H2, NR1H3, NSDHL, PMVK, SC5D, SCD, SOAT1, SOAT2, SQLE, SREBF1, SREBF2, TM7SF2</p>                                                                                                                                                                                                                                                                                                                                                                                                                                                                                                                                                                                                                                                                                                                                                                                                                                                                                                                                                                                                                                                                                                                                                                                                                                                                                                                                                                                                                                                                                                                |



| Gene sets name                                      | Genes                                                                                                                                                                                                                                                                                                                                                                                                                                                                                                                                                                                                                                                                |
|-----------------------------------------------------|----------------------------------------------------------------------------------------------------------------------------------------------------------------------------------------------------------------------------------------------------------------------------------------------------------------------------------------------------------------------------------------------------------------------------------------------------------------------------------------------------------------------------------------------------------------------------------------------------------------------------------------------------------------------|
| REACTOME SPHINGOLIPID METABOLISM                    | ACER1, ACER2, ACER3, ALDH3A2, ALDH3B1, ALDH3B2, ARSA, ARSB, ARSD, ARSF, ARSG, ARSH, ARSI, ARSJ, ARSK, ARSL, ASAH1, ASAH2, B3GALNT1, B4GALNT1, CERK, CERS1, CERS2, CERS3, CERS4, CERS5, CERS6, CERT1, CPTP, CSNK1G2, CTSA, DEGS1, DEGS2, ENPP7, ESYT1, ESYT2, ESYT3, FA2H, GALC, GBA, GBA2, GLA, GLB1, GLB1L, GLTP, GM2A, HEXA, HEXB, KDSR, NEU1, NEU2, NEU3, NEU4, ORMDL1, ORMDL2, ORMDL3, OSBP, PLPP1, PLPP2, PLPP3, PPM1L, PRKD1, PRKD2, PRKD3, PSAP, SAMD8, SGMS1, SGMS2, SGPL1, SGPP1, SGPP2, SMPD1, SMPD2, SMPD3, SMPD4, SPHK1, SPHK2, SPNS2, SPTLC1, SPTLC2, SPTLC3, SPTSSA, SPTSSB, STS, SUMF1, SUMF2, UGCG, UGT8, VAPA, VAPB                                 |
| WP LIPID METABOLISM PATHWAY                         | ABHD5, ACACA, ACLY, ACSBG1, ACSS2, AKT1, AKT2, AKT3, BCKDHA, FASN, HILPDA, LIPE, PDHA1, PLIN1, PNPLA2, PRKAA1, PRKAA2, PRKAB1, PRKAB2, PRKACA, PRKACB, PRKACG, PRKAG1, PRKAG2, PRKAG3, PRKAR1A, PRKAR1B, PRKAR2A, PRKAR2B                                                                                                                                                                                                                                                                                                                                                                                                                                            |
| PHOSPHOLIPID METABOLIC PROCESS                      | ACSL3, ADGRF5, APOC2, CAPN2, CHP1, ENPP7, FABP3, HTR2A, HTR2B, HTR2C, NR1H4, PRKCD, RAB38, STOML2, TFAFAZZIN, ABCA2, ABCA3, APOC1, CHRM5, DNAJC19, GNB3, IDH1, LDLR, LPCAT1, LPIN1, MFSD2A, MIR30C1, MTMR1, MTMR2, MTMR3, MTMR4, MTMR9, PDGFA, PDGFB, PHB2, SCARB1, SLC27A1                                                                                                                                                                                                                                                                                                                                                                                          |
| REACTOME KETONE BODY METABOLISM                     | AACS, ACAT1, ACSS3, BDH1, BDH2, HMGCL, HMGCLL1, HMGCS2, OXCT1, OXCT2                                                                                                                                                                                                                                                                                                                                                                                                                                                                                                                                                                                                 |
| GO REGULATION OF CHOLESTEROL METABOLIC PLIC PROCESS | APOE, ERLIN1, ERLIN2, MIR185, MIR30C1, MIR548P, SCAP, SOD1, ABCG1, ABCG4, CES1, CYP7A1, FGF1, LDLRAP1, MIR182, MIR96, POR, PRKAA1, SREBF1, ABCA2, ACADL, ACADVL, APOB, ARV1, DGAT2, DGKQ, DHCR7, EPHX2, FMO5, GNB3, LDLR, LPCAT3, MBTPS1, MBTPS2, NR1H4, SEC14L2, SERPINA12, TTC39B                                                                                                                                                                                                                                                                                                                                                                                  |
| REACTOME PHOSPHOLIPID METABOLISM                    | ABHD3, ABHD4, ACHE, ACP6, AGK, AGPAT1, AGPAT2, AGPAT3, AGPAT4, AGPAT5, ALPI, ARF1, ARF3, AWAT2, BCHE, BMX, CDIPT, CDS1, CDS2, CEPT1, CHAT, CHKA, CHKB, CHPT1, CPNE1, CPNE3, CPNE6, CPNE7, CRLS1, CSNK2A1, CSNK2A2, CSNK2B, DDHD1, DDHD2, DGAT1, DGAT2, DGAT2L6, ENPP6, ETNK1, ETNK2, ETNPPL, FIG4, GDE1, GPD1, GPD3, GPD5, GNPAT, GPAM, GPAT2, GPAT3, GPAT4, GPCPD1, GPD1, GPD1L, GPD2, HADHA, HADHB, INPP4A, INPP4B, INPP5D, INPP5E, INPP5F, INPP5J, INPP5K, INPPL1, LCLAT1, LIPH, LIPI, LPCAT1, LPCAT2, LPCAT3, LPCAT4, LPGAT1, LPIN1, LPIN2, LPIN3, MBOAT1, MBOAT2, MBOAT7, MFSD2A, MGLL, MIGA1, MIGA2, MTM1, MTMR1, MTMR10, MTMR12, MTMR14, MTMR2, MTMR3, MTMR4, |

| Gene sets name                                                                                 | Genes                                                                                                                                                                                                                                                                                                                                                                                                                                                                                                                                                                                                                                                                                                                                                                                                                                                                                                                                                                                                                                                                                                                                                                                                                                                                                                                                                                                                                                                                                                                                                                                                                         |
|------------------------------------------------------------------------------------------------|-------------------------------------------------------------------------------------------------------------------------------------------------------------------------------------------------------------------------------------------------------------------------------------------------------------------------------------------------------------------------------------------------------------------------------------------------------------------------------------------------------------------------------------------------------------------------------------------------------------------------------------------------------------------------------------------------------------------------------------------------------------------------------------------------------------------------------------------------------------------------------------------------------------------------------------------------------------------------------------------------------------------------------------------------------------------------------------------------------------------------------------------------------------------------------------------------------------------------------------------------------------------------------------------------------------------------------------------------------------------------------------------------------------------------------------------------------------------------------------------------------------------------------------------------------------------------------------------------------------------------------|
| <p>REACTOME TRANSCRIPTIONAL<br/>REGULATION OF W OF<br/>WHITE ADIPOCYTE<br/>DIFFERENTIATION</p> | <p>MTMR6, MTMR7, MTMR8, MTMR9, OCRL, OSBPL10, OSBPL5, OSBPL8, PCTP, PCYT1A, PCYT1B, PCYT2, PEMT, PGS1, PHOSPHO1, PI4K2A, PI4K2B, PI4KA, PI4KB, PIK3C2A, PIK3C2B, PIK3C2G, PIK3C3, PIK3CA, PIK3CB, PIK3CD, PIK3CG, PIK3R1, PIK3R2, PIK3R3, PIK3R4, PIK3R5, PIK3R6, PIKFYVE, PIP4K2A, PIP4K2B, PIP4K2C, PIP4P1, PIP5K1A, PIP5K1B, PIP5K1C, PISD, PITPNB, PITPNM1, PITPNM2, PITPNM3, PLA1A, PLA2G10, PLA2G12A, PLA2G15, PLA2G1B, PLA2G2A, PLA2G2D, PLA2G2E, PLA2G2F, PLA2G3, PLA2G4A, PLA2G4B, PLA2G4C, PLA2G4D, PLA2G4E, PLA2G4F, PLA2G5, PLA2G6, PLA2R1, PLAAT1, PLAAT2, PLAAT3, PLAAT4, PLAAT5, PLB1, PLBD1, PLD1, PLD2, PLD3, PLD4, PLD6, PLEKHA1, PLEKHA2, PLEKHA3, PLEKHA4, PLEKHA5, PLEKHA6, PLEKHA8, PNPLA2, PNPLA3, PNPLA6, PNPLA7, PNPLA8, PTDSS1, PTDSS2, PTEN, PTPMT1, PTPN13, RAB14, RAB4A, RAB5A, RUFY1, SACM1L, SBF1, SBF2, SELENOI, SLC44A1, SLC44A2, SLC44A3, SLC44A4, SLC44A5, STARD10, STARD7, SYNJ1, SYNJ2, TAFAZZIN, TMEM86B, TNFAIP8, TNFAIP8L1, TNFAIP8L2, TNFAIP8L3, TPTE, TPTE2, VAC14</p> <p>ADIPOQ, ADIRF, ANGPTL4, CARM1, CCNC, CCND3, CD36, CDK19, CDK4, CDK8, CEBPA, CEBPB, CEBPD, CHD9, CREBBP, EBF1, EGR2, EP300, FABP4, FAM120B, HDAC3, HELZ2, KLF4, KLF5, LEP, LPL, MED1, MED10, MED11, MED12, MED13, MED13L, MED14, MED15, MED16, MED17, MED18, MED19, MED20, MED21, MED22, MED23, MED24, MED25, MED26, MED27, MED28, MED29, MED30, MED31, MED4, MED6, MED7, MED8, MED9, NCOA1, NCOA2, NCOA3, NCOA6, NCOR1, NCOR2, NFKB1, NR2F2, PCK1, PLIN1, PPARA, PPARG, PPARGC1A, RELA, RXRA, SLC2A4, SMARCD3, SREBF1, SREBF2, TBL1X, TBL1XR1, TGFB1, TGS1, THRAP3, TNF, WNT1, WNT10B, ZNF467, ZNF638</p> |
| <p>REACTOME PLASMA<br/>LIPOPROTEIN ASSEMBLY<br/>REMODELING AND CLEARANCE</p>                   | <p>A2M, ABCA1, APOA1, APOA2, APOA4, APOB, APOC1, APOC2, APOC3, APOC4, APOE, BMP1, MTPP, P4HB, PRKACA, PRKACB, PRKACG, SAR1B, ZDHHC8, A2M, ABCA1, ABCG1, ALB, AMN, ANGPTL3, ANGPTL4, ANGPTL8, AP2A1, AP2A2, AP2B1, AP2M1, AP2S1, APOA1, APOA2, APOA4, APOA5, APOB, APOBR, APOC1, APOC2, APOC3, APOC4, APOE, APOF, BMP1, CES3, CETP, CIDEA, CLTA, CLTC, CREB3L3, CUBN, FGF21, FURIN, GPIHBP1, HDLBP, LCAT, LDLR, LDLRAP1, LIPA, LIPC, LIPG, LMF1, LMF2, LPA, LPL, LSR, MBTPS1, MBTPS2, MTPP, MYLIP, NCEH1, NPC1, NPC2, NR1H2, NR1H3, P4HB, PCSK5, PCSK6, PCSK9, PLTP, PRKACA, PRKACB, PRKACG, SAR1B, SCARB1, SOAT1, SOAT2, VLDLR, ZDHHC8, AMN, AP2A1, AP2A2, AP2B1, AP2M1,</p>                                                                                                                                                                                                                                                                                                                                                                                                                                                                                                                                                                                                                                                                                                                                                                                                                                                                                                                                                  |

| Gene sets name                                                       | Genes                                                                                                                                                                                                                                                                                                                                                                                                                                                                                                                                                                                                                                                    |
|----------------------------------------------------------------------|----------------------------------------------------------------------------------------------------------------------------------------------------------------------------------------------------------------------------------------------------------------------------------------------------------------------------------------------------------------------------------------------------------------------------------------------------------------------------------------------------------------------------------------------------------------------------------------------------------------------------------------------------------|
| WP SPHINGOLIPID PATHWAY                                              | AP2S1, APOA1, APOB, APOBR, APOC1, APOC4, APOE, CES3, CLTA, CLTC, CUBN, HDLBP, LDLR, LDLRAP1, LIPA, LIPC, LSR, MYLIP, NCEH1, NPC1, NPC2, NR1H2, NR1H3, PCSK9, SCARB1, SOAT1, SOAT2, VLDLR, ABCG1, ALB, ANGPTL3, ANGPTL4, ANGPTL8, APOA1, APOA2, APOA4, APOA5, APOB, APOC2, APOC3, APOE, APOF, CETP, CIDEA, CREB3L3, FGF21, FURIN, GPIHBP1, LCAT, LIPC, LIPG, LMF1, LMF2, LPA, LPL, MBTPS1, MBTPS2, MTPP, P4HB, PCSK5, PCSK6, PLTP<br>ACER1, ASAH1, ASAH2, B4GALT6, CERK, CERS2, CERS3, CERS4, CERS5, CERS6, CERT1, GAL3ST1, GBA, GBA2, KDSR, PLPP1, PPP1CA, PPP2CA, SERINC1, SGMS1, SGMS2, SGPL1, SGPP2, SPHK1, SPHK2, SPTLC1, SPTLC2, SPTLC3, UGCG, UGT8 |
| REACTOME TRIGLYCERIDE<br>BIOSYNTHESIS                                | AGMO, DGAT1, DGAT2, GK, GK2, GK3P, GPAM, GPAT2, LPIN1, LPIN2, LPIN3, MOGAT1, MOGAT2, MOGAT3                                                                                                                                                                                                                                                                                                                                                                                                                                                                                                                                                              |
| REACTOME TRIGLYCERIDE<br>CATABOLISM                                  | ABHD5, CAV1, FABP1, FABP12, FABP2, FABP3, FABP4, FABP5, FABP6, FABP7, FABP9, GPD2, LIPE, MGLL, PLIN1, PLIN3, PNPLA4, PNPLA5, PPP1CA, PPP1CB, PPP1CC, PRKACA, PRKACB, PRKACG                                                                                                                                                                                                                                                                                                                                                                                                                                                                              |
| REACTOME TRIGLYCERIDE<br>METABOLISM                                  | ABHD5, AGMO, CAV1, DGAT1, DGAT2, FABP1, FABP12, FABP2, FABP3, FABP4, FABP5, FABP6, FABP7, FABP9, GK, GK2, GK3P, GPAM, GPAT2, GPD2, LIPE, LPIN1, LPIN2, LPIN3, MGLL, MOGAT1, MOGAT2, MOGAT3, PLIN1, PLIN3, PNPLA4, PNPLA5, PPP1CA, PPP1CB, PPP1CC, PRKACA, PRKACB, PRKACG                                                                                                                                                                                                                                                                                                                                                                                 |
| WP CHOLESTEROL<br>BIOSYNTHESIS PATHWAY                               | CYP51A1, DHCR7, FDFT1, FDPS, HMGCR, HMGCS1, IDI1, LSS, MSMO1, MVD, MVK, NSDHL, PMVK, SC5D, SQLE                                                                                                                                                                                                                                                                                                                                                                                                                                                                                                                                                          |
| REACTOME REGULATION OF<br>CHOLESTEROL BIOSYNTHESIS<br>BY SREBP SREBF | ACACA, ACACB, CARM1, CHD9, CREBBP, CYP51A1, DHCR7, ELOVL6, FASN, FDFT1, FDPS, GGPS1, GPAM, HELZ2, HMGCR, HMGCS1, IDI1, INSIG1, INSIG2, KPNB1, LSS, MBTPS1, MBTPS2, MED1, MTF1, MVD, MVK, NCOA1, NCOA2, NCOA6, NFYA, NFYB, NFYC, PMVK, PPARA, RAN, RXRA, SAR1B, SC5D, SCAP, SCD, SEC23A, SEC24A, SEC24B, SEC24C, SEC24D, SMARCD3, SP1, SQLE, SREBF1, SREBF2, TBL1X, TBL1XR1, TGS1, TM7SF2                                                                                                                                                                                                                                                                 |

**Supplementary Table 4** TG, TC, HDL, and LDL gene sets from MsigDB database (<https://www.gsea-msigdb.org/gsea/msigdb>).

| Gene sets name                                                               | Genes                                                                                                                                                                                                                                                                                                                                                                                                                                                                                                                                                                                                                                                                                                                                                  |
|------------------------------------------------------------------------------|--------------------------------------------------------------------------------------------------------------------------------------------------------------------------------------------------------------------------------------------------------------------------------------------------------------------------------------------------------------------------------------------------------------------------------------------------------------------------------------------------------------------------------------------------------------------------------------------------------------------------------------------------------------------------------------------------------------------------------------------------------|
| GOBP TRIGLYCERIDE METABOLIC PROCESS                                          | AADAC, ABHD5, ACSL1, AGMO, APOA1, APOA2, APOA4, APOA5, APOB, APOBEC1, APOBR, APOC1, APOC2, APOC3, APOE, APOH, ATG14, C3, CAT, CAV1, CAV3, CETP, CNEP1R1, CPS1, CPT1A, CTDNEP1, CYP2E1, DAGLB, DDHD2, DGAT1, DGAT2, FBXW7, FGF21, FITM2, G6PC1, GK, GK2, GK5, GNB3, GPAM, GPAT2, GPAT3, GPAT4, GPIHBP1, GPLD1, GPX1, INSIG1, INSIG2, LDLR, LIPC, LIPE, LIPF, LIPG, LIPH, LIPI, LMF1, LPGAT1, LPIN1, LPIN2, LPIN3, LPL, MBOAT7, MFSD2A, MGLL, MIR29B1, MIR30C1, MIR548P, MOGAT1, MOGAT2, MOGAT3, MTPP, NKX2-3, NR1H2, NR1H3, PANK2, PCK1, PCK2, PCSK9, PIK3CG, PLAAT3, PLB1, PLIN5, PNLIPRP2, PNPLA1, PNPLA2, PNPLA3, PNPLA4, PNPLA5, PTPN11, RGN, SCARB1, SEL1L, SERPINA12, SIK1, SIRT1, SLC22A4, SLC27A1, SLC27A5, SORL1, SREBF1, TBL1XR1, THRSP, TNXB |
| GOBP REGULATION OF LOW DENSITY LIPOPROTEIN PARTICLE CLEARANCE                | ABCC8, ANXA2, APOC3, CNPY2, CSK, FGF21, HNRNPK, IL19, KHSRP, LDLR, LDLRAP1, MIR133A1, MIR148A, MIR17, MIR185, MIR199A1, MIR27A, MIR27B, MYLIP, NR1H4, PCSK9, TREM2                                                                                                                                                                                                                                                                                                                                                                                                                                                                                                                                                                                     |
| GOBP POSITIVE REGULATION OF LOW DENSITY LIPOPROTEIN RECEPTOR ACTIVITY        | ANXA2, CNPY2, FGF21, HNRNPK, PPARG                                                                                                                                                                                                                                                                                                                                                                                                                                                                                                                                                                                                                                                                                                                     |
| GOBP NEGATIVE REGULATION OF LOW DENSITY LIPOPROTEIN RECEPTOR ACTIVITY        | ABCA2, ADIPOQ, APP, ITGAV, ITGB3, MIR185, MIR27A, PCSK9, PSEN1                                                                                                                                                                                                                                                                                                                                                                                                                                                                                                                                                                                                                                                                                         |
| GOBP NEGATIVE REGULATION OF LOW DENSITY LIPOPROTEIN PARTICLE CLEARANCE       | ABCC8, APOC3, CSK, IL19, KHSRP, LDLR, MIR133A1, MIR148A, MIR17, MIR185, MIR199A1, MIR27A, MIR27B, MYLIP, PCSK9                                                                                                                                                                                                                                                                                                                                                                                                                                                                                                                                                                                                                                         |
| GOBP LOW DENSITY LIPOPROTEIN RECEPTOR PARTICLE METABOLIC PROCESS             | ABCA2, ANXA2, APOE, FURIN, MYLIP, PCSK9                                                                                                                                                                                                                                                                                                                                                                                                                                                                                                                                                                                                                                                                                                                |
| GOBP LOW DENSITY LIPOPROTEIN PARTICLE REMODELING                             | ABCG1, AGT, AGTR1, APOA2, APOB, APOE, CETP, LIPC, MPO, MTPP, PLA2G10, PLA2G2A, PLA2G2E, PLA2G3, PLA2G5, PLA2G7                                                                                                                                                                                                                                                                                                                                                                                                                                                                                                                                                                                                                                         |
| GOBP LOW DENSITY LIPOPROTEIN PARTICLE CLEARANCE                              | ABCC8, ADIPOQ, ANXA2, APOB, APOC3, CD36, CES3, CNPY2, CSK, DGAT2, EHD1, FGF21, HMOX1, HNRNPK, IL19, KHSRP, LDLR, LDLRAP1, LIPA, MIR133A1, MIR148A, MIR17, MIR185, MIR199A1, MIR27A, MIR27B, MYLIP, NCEH1, NR1H4, PCSK9, SCARB1, SOAT1, SOAT2, TREM2                                                                                                                                                                                                                                                                                                                                                                                                                                                                                                    |
| GOBP CELLULAR RESPONSE TO OXIDISED LOW DENSITY LIPOPROTEIN PARTICLE STIMULUS | ADTRP, AKT1, CD36, CD68, MIA3, MIR146A, MYD88, SMPD3, TICAM1, TLR4, TLR6, TREM2                                                                                                                                                                                                                                                                                                                                                                                                                                                                                                                                                                                                                                                                        |
| GOBP CELLULAR RESPONSE TO LOW DENSITY                                        | ABCA1, CASR, CD36, CD81, CD9, CDH13, CES1, FCER1G, FGF21, ITGB1, ITGB2,                                                                                                                                                                                                                                                                                                                                                                                                                                                                                                                                                                                                                                                                                |

| Gene sets name                                                              | Genes                                                                                                                                                                                                                 |
|-----------------------------------------------------------------------------|-----------------------------------------------------------------------------------------------------------------------------------------------------------------------------------------------------------------------|
| LIPOPROTEIN PARTICLE STIMULUS                                               | LDLR, LPL, MIR302A, MIR758, MIR92A1, NPC1, PPARG, SOCS5, SREBF2, SYK                                                                                                                                                  |
| <b>GOBP REGULATION OF HIGH DENSITY LIPOPROTEIN PARTICLE CLEARANCE</b>       | APOC3, GPLD1, LIPG, MIR144, MIR302A, MIR33A, MIR33B, TREM2                                                                                                                                                            |
| <b>GOBP HIGH DENSITY LIPOPROTEIN PARTICLE REMODELING</b>                    | ABCA5, ABCG1, APOA1, APOA2, APOA4, APOC1, APOC3, APOE, APOM, CETP, LCAT, LIPC, LIPG, PLA2G3, PLTP, SCARB1                                                                                                             |
| <b>GOBP HIGH DENSITY LIPOPROTEIN PARTICLE CLEARANCE</b>                     | APOA1, APOA2, APOC2, APOC3, APOE, APOM, GPLD1, LDLR, LIPG, MIR144, MIR302A, MIR33A, MIR33B, SCARB1, TREM2                                                                                                             |
| <b>GOBP HIGH DENSITY LIPOPROTEIN PARTICLE ASSEMBLY</b>                      | ABCA1, ABCA7, APOA1, APOA2, APOA4, APOA5, APOE, APOM, LCAT, MIR144, NR1H2, PRKACA, PRKACB, PRKACG, ZDHHC8                                                                                                             |
| <b>GOBP CELLULAR RESPONSE TO CHOLESTEROL</b>                                | CES1, CYP7A1, DAG1, GPLD1, GRAMD1A, GRAMD1B, GRAMD1C, INHBA, INHBB, LRP6, LRP8, MIR182, MIR185, MIR96, MLC1, OSBPL7, PTCH1, SMO                                                                                       |
| <b>GOBP NEGATIVE REGULATION OF CHOLESTEROL EFFLUX</b>                       | ABCA2, EGF, MIR128-1, MIR130B, MIR144, MIR148A, MIR19B1, MIR206, MIR26A1, MIR27A, MIR27B, MIR301B, MIR302A, MIR33A, MIR33B, MIR613, MIR758, PLA2G10, SHH, SREBF2                                                      |
| <b>GOBP NEGATIVE REGULATION OF CHOLESTEROL METABOLIC PROCESS</b>            | APOE, ERLIN1, ERLIN2, MIR185, MIR30C1, MIR548P, SCAP, SOD1                                                                                                                                                            |
| <b>GOBP NEGATIVE REGULATION OF CHOLESTEROL STORAGE</b>                      | ABCA1, ABCG1, CES1, MIR146A, NR1H2, NR1H3, PPARA, PPARD, PPARG, TREM2, TTC39B                                                                                                                                         |
| <b>GOBP POSITIVE REGULATION OF CHOLESTEROL EFFLUX</b>                       | ABCA1, ABCA12, ABCA3, ABCA7, ABCA8, ABCG1, ABCG4, ADIPOQ, APOA1, APOE, CAV1, CES1, EEPD1, GPS2, LRP1, MIR206, NFKBIA, NR1H2, NR1H3, PLTP, PON1, PPARG, PTCH1, RXRA, SIRT1, TREM2, ZDHHC8                              |
| <b>GOBP POSITIVE REGULATION OF CHOLESTEROL ESTERIFICATION</b>               | AGT, AGTR1, APOA1, APOA2, APOA4, APOA5, APOC1, APOE, STARD4                                                                                                                                                           |
| <b>GOBP POSITIVE REGULATION OF CHOLESTEROL METABOLIC PROCESS</b>            | ABCG1, ABCG4, CES1, CYP7A1, FGF1, LDLRAP1, MIR182, MIR96, POR, PRKAA1, SCAP, SREBF1                                                                                                                                   |
| <b>GOBP POSITIVE REGULATION OF CHOLESTEROL STORAGE</b>                      | APOB, CD36, EHD1, LPL, MIR144, MSR1, SCARB1, SREBF2                                                                                                                                                                   |
| <b>GOBP RECEPTOR MEDIATED ENDOCYTOSIS INVOLVED IN CHOLESTEROL TRANSPORT</b> | ABCA2, ANXA2, LDLR, LDLRAP1, LRP6, MIR17, MIR27B, PCSK9                                                                                                                                                               |
| <b>GOBP REGULATION OF CHOLESTEROL EFFLUX</b>                                | ABCA1, ABCA12, ABCA2, ABCA3, ABCA5, ABCA7, ABCA8, ABCG1, ABCG4, ADIPOQ, APOA1, APOE, CAV1, CES1, CETP, EEPD1, EGF, GPS2, LAMTOR1, LRP1, MIR128-1, MIR130B, MIR144, MIR148A, MIR19B1, MIR206, MIR26A1, MIR27A, MIR27B, |

| Gene sets name                                                                                                             | Genes                                                                                                                                                                                                                                                                               |
|----------------------------------------------------------------------------------------------------------------------------|-------------------------------------------------------------------------------------------------------------------------------------------------------------------------------------------------------------------------------------------------------------------------------------|
| <b>GOBP REGULATION OF CHOLESTEROL ESTERIFICATION</b>                                                                       | MIR301B, MIR302A, MIR33A, MIR33B, MIR613, MIR758, NAXE, NFKBIA, NR1H2, NR1H3, PLA2G10, PLTP, PON1, PPARG, PTCH1, RXRA, SHH, SIRT1, SREBF2, TREM2, TTC39B, YJEFN3, ZDHHC8<br>ABCA2, ABCG1, AGT, AGTR1, APOA1, APOA2, APOA4, APOA5, APOC1, APOE, LAMTOR1, MIR27A, MIR27B, STARD4      |
| <b>GOBP REGULATION OF CHOLESTEROL METABOLIC PROCESS</b>                                                                    | ABCA2, ABCG1, ABCG4, ACADL, ACADVL, APOB, APOE, ARV1, CES1, CYP7A1, DGAT2, DGKQ, DHCR7, EPHX2, ERLIN1, ERLIN2, FGF1, FMO5, GNB3, LDLR, LDLRAP1, LPCAT3, MBTPS1, MBTPS2, MIR182, MIR185, MIR30C1, MIR548P, MIR96, NR1H4, POR, PRKAA1, SCAP, SEC14L2, SERPINA12, SOD1, SREBF1, TTC39B |
| <b>GOBP REGULATION OF RECEPTOR MEDIATED ENDOCYTOSIS INVOLVED IN CHOLESTEROL TRANSPORT<br/>GOBP RESPONSE TO CHOLESTEROL</b> | ABCA2, ANXA2, LDLRAP1, MIR17, MIR27B, PCSK9<br>ABCA2, CCL3, CCR5, CES1, CYP7A1, CYP8B1, DAG1, F7, GPLD1, GRAMD1A, GRAMD1B, GRAMD1C, INHBA, INHBB, LRP6, LRP8, MIR182, MIR185, MIR96, MLC1, OSBPL7, PMVK, PTCH1, SMAD2, SMO, TGFB1, TGFBR1, TGFBR2                                   |
| <b>GOCC TRIGLYCERIDE RICH PLASMA LIPOPROTEIN PARTICLE</b>                                                                  | APOA1, APOA2, APOA4, APOA5, APOB, APOBR, APOC1, APOC2, APOC3, APOC4, APOE, APOH, APOL1, APOM, APOO, LPL, LSR, PCYOX1, SELENOS, VLDLR                                                                                                                                                |
| <b>GOCC LOW DENSITY LIPOPROTEIN PARTICLE</b>                                                                               | APOA5, APOB, APOBR, APOC2, APOE, APOF, APOM, APOO, LDLR, LSR, MSR1, PLA2G7, SELENOS                                                                                                                                                                                                 |
| <b>GOCC SPHERICAL HIGH DENSITY LIPOPROTEIN PARTICLE</b>                                                                    | APOA1, APOA2, APOC2, APOC3, APOM, CLU, HPR, PON1                                                                                                                                                                                                                                    |
| <b>GOCC HIGH DENSITY LIPOPROTEIN PARTICLE</b>                                                                              | APOA1, APOA2, APOA4, APOA5, APOB, APOC1, APOC2, APOC3, APOC4, APOE, APOF, APOH, APOL1, APOM, APOO, CETP, CLU, HDLBP, HPR, LCAT, LIPC, PLA2G7, PLTP, PON1, SAA1, SAA2, SAA4                                                                                                          |
| <b>GOMF LOW DENSITY LIPOPROTEIN PARTICLE RECEPTOR BINDING</b>                                                              | ANKRA2, AP2A1, AP2M1, APBB1, APBB3, APOA5, APOB, APOE, CLTC, CLU, CRP, DAB2, DKK1, DNAJA1, HSP90B1, HSPG2, LANCL1, LDLRAP1, LRPAP1, MESD, PCSK9, PICALM, SNX17, SYT1                                                                                                                |
| <b>GOMF LOW DENSITY LIPOPROTEIN PARTICLE RECEPTOR ACTIVITY</b>                                                             | CD36, CXCL16, LDLR, LRP1, LRP10, LRP12, LRP1B, LRP2, LRP6, LRP8, OLR1, SORL1, STAB1, STAB2, VLDLR                                                                                                                                                                                   |
| <b>GOMF LOW DENSITY LIPOPROTEIN PARTICLE BINDING</b>                                                                       | APCS, CD36, CDH13, COLEC12, CRP, LDLR, LIPC, MSR1, PCSK9, PLTP, SAMD1, SCARB1, SCARF1, SORL1, STAB1, STAB2, THBS1, TREM2                                                                                                                                                            |
| <b>GOMF HIGH DENSITY LIPOPROTEIN PARTICLE BINDING</b>                                                                      | APOA1, APOA2, APOL2, APOL5, CD36, HSPD1, LRP8, MIR30C1, MIR9-1, PLTP, SCARB1, TREM2                                                                                                                                                                                                 |
| <b>GOMF CHOLESTEROL BINDING</b>                                                                                            | ABCA1, ABCG1, ANXA6, APOA1, APOA2, APOA4, APOA5, APOC3, APOD, APOF,                                                                                                                                                                                                                 |

| Gene sets name                                           | Genes                                                                                                                                                                                                                                                                                                                                                                                                                                                                                                                                                                                                                                                                                                                                                                              |
|----------------------------------------------------------|------------------------------------------------------------------------------------------------------------------------------------------------------------------------------------------------------------------------------------------------------------------------------------------------------------------------------------------------------------------------------------------------------------------------------------------------------------------------------------------------------------------------------------------------------------------------------------------------------------------------------------------------------------------------------------------------------------------------------------------------------------------------------------|
| <b>BIOCARTA LDL PATHWAY</b>                              | CAV1, CD81, CETP, ERLIN1, ERLIN2, GRAMD1A, GRAMD1B, GRAMD1C, NPC1, NPC2, NR1H3, OSBP2, OSBPL10, OSBPL1A, OSBPL2, OSBPL3, OSBPL5, OSBPL6, OSBPL7, OSBPL8, PMP2, PROM1, PROM2, PTCH1, SCARB2, SCP2, SIDT1, SOAT1, SOAT2, STAR, STARD3, STARD3NL, STARD4, STARD5, SULT2B1, SYP, TSPO, TSPO2, VDAC1, VDAC2                                                                                                                                                                                                                                                                                                                                                                                                                                                                             |
| <b>WP CHOLESTEROL BIOSYNTHESIS PATHWAY</b>               | ACAT1, CCL2, CSF1, IL6, LDLR, LPL                                                                                                                                                                                                                                                                                                                                                                                                                                                                                                                                                                                                                                                                                                                                                  |
| <b>HP HYPERTRIGLYCERIDEMIA</b>                           | CYP51A1, DHCR7, FDFT1, FDPS, HMGCR, HMGCS1, IDI1, LSS, MSMO1, MVD, MVK, NSDHL, PMVK, SC5D, SQLE                                                                                                                                                                                                                                                                                                                                                                                                                                                                                                                                                                                                                                                                                    |
| <b>HP HYPOTRIGLYCERIDEMIA</b>                            | ABCA1, ABHD5, AEBP1, AGL, AGPAT2, AKT2, ALMS1, APOA5, APOC2, APOE, BSCL2, CAV1, CAVIN1, CEP19, CIDEA, CREB3L3, CYP7A1, DAAM2, DEAF1, EMD, FARSA, FECH, FHL1, FLII, FOS, GK, GPD1, HAVCR2, IQSEC2, JAG1, LCAT, LDLRAP1, LEP, LEPR, LIPA, LIPC, LIPE, LMF1, LMNA, LPL, LRP6, LYST, MC4R, MCM10, MTX2, NSMCE2, PHKA2, PHKG2, PIGH, PIGT, PLIN1, PLVAP, PNPLA2, POLD1, POLR3A, PPARG, PRF1, PSMB10, PSMB4, PSMB8, PSMB9, PYGL, RAI1, RSPO1, SGPL1, SLC25A13, SLC29A3, SLC2A2, SLC37A4, SLC7A7, SMPD1, STX11, STXBP2, SYNE1, SYNE2, TMEM43, TTPA, UNC13D, XIAP, XRCC4, YARS1                                                                                                                                                                                                            |
| <b>HP ABNORMAL CIRCULATING CHOLESTEROL CONCENTRATION</b> | ANGPTL3, APOC3, CETP, GALNT2, MTTP, NGLY1, PCYT1A, SAR1B                                                                                                                                                                                                                                                                                                                                                                                                                                                                                                                                                                                                                                                                                                                           |
| <b>HP HYPERCHOLESTEROLEMIA</b>                           | ABCA1, ABCA2, ABCB4, ABCG5, ABCG8, AGPAT2, ALB, ALG12, ALG6, ALMS1, ANGPTL3, APOA1, APOA2, APOA5, APOB, APOC2, APOC3, APOE, APTX, ATAD3A, ATP6AP1, BSCL2, CAV1, CAV3, CAVIN1, CCDC115, CCT5, CEP19, CETP, COG4, CREB3L3, CYP11A1, CYP27A1, CYP7A1, DAAM2, DEAF1, DGAT1, DHCR24, DHCR7, DLK1, DMPK, DYRK1B, EBP, EMD, EPHX2, FDFT1, FHL1, FLCN, FLII, FOS, GALK1, GALNT2, GHR, GPIHBP1, HSD3B7, HTT, IQSEC2, JAG1, LBR, LCAT, LDLR, LDLRAP1, LIPA, LIPC, LMNA, LPL, LRP6, MEF2A, MEG3, MSMO1, MTTP, MTX2, NGLY1, NPC2, NSDHL, NUP107, OCRL, PANK2, PCSK9, PEX12, PHKA2, PHKG2, PIK3R5, PMM2, PPARG, PPP1R17, PSAP, PSMB8, PYGL, RAI1, RSPO1, RTL1, SAR1B, SC5D, SETX, SLC25A13, SLC2A3, SLC37A4, SLC7A7, SMPD1, SYNE1, SYNE2, TBL1X, TDP1, TMEM199, TMEM43, TSHB, TTPA, UBE3B, UBR1 |
|                                                          | ABCB4, ABCG5, ABCG8, AGPAT2, ALB, APOB, APOC2, APOC3, APOE, APTX, ATP6AP1, BSCL2, CAV1, CAV3, CAVIN1, CCDC115, CEP19, CETP, COG4, CREB3L3, CYP7A1, DAAM2, DEAF1, DGAT1, DLK1, DMPK, DYRK1B, FLII, FOS, GALK1, GHR, IQSEC2, JAG1, LDLR, LDLRAP1, LIPA, LIPC, LMNA, LPL, LRP6, MEF2A, MEG3,                                                                                                                                                                                                                                                                                                                                                                                                                                                                                          |

| Gene sets name                                 | Genes                                                                                                                                                                                                                                                                                                                                                                                                                                                                                                                                                                                                                                                                                             |
|------------------------------------------------|---------------------------------------------------------------------------------------------------------------------------------------------------------------------------------------------------------------------------------------------------------------------------------------------------------------------------------------------------------------------------------------------------------------------------------------------------------------------------------------------------------------------------------------------------------------------------------------------------------------------------------------------------------------------------------------------------|
| <b>HP HYPOCHOLESTEROLEMIA</b>                  | MTX2, NUP107, OCRL, PCSK9, PHKA2, PHKG2, PIK3R5, PPARG, PYGL, RAI1, RSP01, RTL1, SETX, SLC25A13, SLC37A4, SLC7A7, TBL1X, TDP1, TMEM199, TSHB, TTPA                                                                                                                                                                                                                                                                                                                                                                                                                                                                                                                                                |
| <b>GOERING BLOOD HDL CHOLESTEROL QTL TRANS</b> | ABCA1, ALG12, ATAD3A, CCT5, DHCR7, FDFT1, FLCN, HSD3B7, MSMO1, MTPP, PEX12, PMM2, PSAP, SAR1B, UBE3B                                                                                                                                                                                                                                                                                                                                                                                                                                                                                                                                                                                              |
| <b>GOERING BLOOD HDL CHOLESTEROL QTL CIS</b>   | CYP4F35P, EPB41L4A, FLT4, KLK3, LDLRAD4, MAPK8IP1, MPO, MSI1, NACC2, PAF1, SCRIB, SELENON, TMEM241, ZC3HC1                                                                                                                                                                                                                                                                                                                                                                                                                                                                                                                                                                                        |
| <b>HALLMARK CHOLESTEROL HOMEOSTASIS</b>        | GSTM1, HLA-DRB3, HLA-DRB5, IKZF1, LGALS2, LINC00339, PPA2, RPL14, RPS26, TIMM10, TMEM176B, UBA52, UTS2                                                                                                                                                                                                                                                                                                                                                                                                                                                                                                                                                                                            |
| <b>REACTOME CHOLESTEROL BIOSYNTHESIS</b>       | ABCA2, ACAT2, ACSS2, ACTG1, ADH4, ALCAM, ALDOC, ANTXR2, ANXA13, ANXA5, ATF3, ATF5, ATXN2, AVPR1A, CBS, CD9, CHKA, CLU, CPEB2, CTNNB1, CXCL16, CYP51A1, DHCR7, EBP, ECH1, ERFFI1, ETHE1, FABP5, FADS2, FASN, FBXO6, FDFT1, FDPS, GLDC, GNAI1, GPX8, GSTM2, GUSB, HMGCR, HMGCS1, HSD17B7, IDI1, JAG1, LDLR, LGALS3, LGMN, LPL, LSS, MAL2, MVD, MVK, NFIL3, NIBAN1, NSDHL, PCYT2, PDK3, PLAUR, PLSCR1, PMVK, PNRC1, PPARG, S100A11, SC5D, SCD, SEMA3B, SQLE, SREBF2, STARD4, STX5, TM7SF2, TMEM97, TNFRSF12A, TP53INP1, TRIB3<br>ACAT2, ARV1, CYP51A1, DHCR24, DHCR7, EBP, FDFT1, FDPS, GGPS1, HMGCR, HMGCS1, HSD17B7, IDI1, IDI2, LBR, LSS, MSMO1, MVD, MVK, NSDHL, PLPP6, PMVK, SC5D, SQLE, TM7SF2 |



**Supplementary Table 5** Lipids genes from MsigDB database (<https://www.gsea-msigdb.org/gsea/msi>)

AADAT  
ACAA1  
ACAA2  
ACADL  
ACADM  
ACADS  
ACADVL  
ACAT2  
ACOT2  
ACOT8  
ACOX1  
ACSL1  
ACSL4  
ACSL5  
ACSM3  
ADH1C  
ADH7  
ALDH3A2  
ALDH9A1  
CBR1  
CD36  
CEL  
CIDEA  
CPT1A  
CPT2  
CRAT  
CYP1A1  
CYP4A11  
CYP4A22  
DECR1  
DHCR24  
ECHS1  
ECI1  
ECI2  
EHHADH  
ELOVL5  
FABP1  
FABP2  
FASN  
G0S2  
GCDH  
GPD1  
GPD2  
HADH  
HADHB  
HAO2  
HMGCL  
HMGCS1  
HMGCS2

HPGD  
HSD17B11  
HSD17B4  
HSD17B7  
IDH1  
IDI1  
LTC4S  
MCEE  
ME1  
MGLL  
MLYCD  
NSDHL  
PPARA  
SERINC1  
SLC22A5  
ACAT1  
ACOX3  
ACSL3  
ACSL6  
ALDH1B1  
ALDH2  
ALDH7A1  
CPT1B  
HADHA  
AGK  
AGPAT1  
AGPAT2  
AGPAT3  
AGPAT4  
AKR1B1  
AWAT2  
DGAT1  
DGAT2  
DGKA  
DGKB  
DGKD  
DGKE  
DGKG  
DGKH  
DGKI  
DGKQ  
DGKZ  
GK  
GK2  
GLA  
GPAM  
GPAT2  
GPAT3  
GPAT4  
LCLAT1

LIPC  
LIPG  
LPL  
MBOAT1  
MBOAT2  
PLPP1  
PLPP2  
PLPP3  
PNPLA3  
ACHE  
CDIPT  
CDS1  
CDS2  
CHAT  
CHKA  
CHKB  
CHPT1  
CRLS1  
ETNK1  
ETNK2  
GNPAT  
GPD1L  
LCAT  
LPCAT1  
LPCAT2  
LPCAT3  
LPCAT4  
LPGAT1  
MBOAT7  
PCYT1A  
PCYT1B  
PCYT2  
PEMT  
PGS1  
PHOSPHO1  
PISD  
PLA2G10  
PLA2G12A  
PLA2G15  
PLA2G1B  
PLA2G2A  
PLA2G2D  
PLA2G2E  
PLA2G2F  
PLA2G3  
PLA2G4A  
PLA2G4B  
PLA2G4E  
PLA2G5  
PLA2G6

PLD1  
PLD2  
PTDSS1  
PTDSS2  
TAFAZZIN  
ACER1  
ACER2  
ACER3  
ARSA  
ASAH1  
ASAH2  
B4GALT6  
CERK  
DEGS1  
DEGS2  
ENPP7  
GAL3ST1  
GALC  
GBA  
GLB1  
KDSR  
NEU1  
NEU2  
NEU3  
NEU4  
SGMS1  
SGMS2  
SGPL1  
SGPP1  
SGPP2  
SMPD1  
SMPD2  
SMPD3  
SMPD4  
SPHK1  
SPHK2  
SPTLC1  
SPTLC2  
UGCG  
UGT8  
ABCC1  
ABCD1  
ACACA  
ACACB  
ACAD10  
ACAD11  
ACBD4  
ACBD5  
ACBD6  
ACBD7

ACLY  
ACOT1  
ACOT11  
ACOT12  
ACOT13  
ACOT4  
ACOT6  
ACOT7  
ACOT9  
ACOX2  
ACOXL  
ACSBG1  
ACSBG2  
ACSF2  
ACSF3  
ACSM6  
AKR1C3  
ALOX12  
ALOX12B  
ALOX15  
ALOX15B  
ALOX5  
ALOX5AP  
ALOXE3  
AMACR  
AWAT1  
CBR4  
CROT  
CYP1A2  
CYP1B1  
CYP2C19  
CYP2C8  
CYP2C9  
CYP2J2  
CYP2U1  
CYP4B1  
CYP4F11  
CYP4F2  
CYP4F22  
CYP4F3  
CYP4F8  
CYP8B1  
DBI  
DECR2  
DPEP1  
DPEP2  
DPEP3  
ELOVL1  
ELOVL2  
ELOVL3

ELOVL4  
ELOVL6  
ELOVL7  
EPHX2  
FAAH  
FAAH2  
FADS1  
FADS2  
GGT1  
GGT5  
GPX1  
GPX2  
GPX4  
HACD1  
HACD2  
HACD3  
HACD4  
HACL1  
HPGDS  
HSD17B12  
HSD17B3  
HSD17B8  
HTD2  
LTA4H  
MAPKAPK2  
MCAT  
MECR  
MID1IP1  
MMAA  
MMUT  
MORC2  
NDUFAB1  
NUDT19  
NUDT7  
OLAH  
PCCA  
PCCB  
PCTP  
PECR  
PHYH  
PON1  
PON2  
PON3  
PPARD  
PPT1  
PPT2  
PRKAA2  
PRKAB2  
PRKAG2  
PRXL2B

PTGDS  
PTGES  
PTGES2  
PTGES3  
PTGIS  
PTGR1  
PTGR2  
PTGS1  
PTGS2  
RXRA  
SCD  
SCD5  
SCP2  
SLC25A1  
SLC25A17  
SLC25A20  
SLC27A2  
SLC27A3  
TBXAS1  
TECR  
TECRL  
THEM4  
THEM5  
THRSP  
CYP2D6  
ARSB  
ARSD  
ARSF  
ARSG  
ARSH  
ARSI  
ARSJ  
ARSK  
ARSL  
B3GALNT1  
B4GALNT1  
CPTP  
CTSA  
ESYT1  
ESYT2  
ESYT3  
GBA2  
GLB1L  
GLTP  
GM2A  
HEXA  
HEXB  
PSAP  
STS  
SUMF1

SUMF2  
AACS  
ABCA1  
ABCB4  
ABHD3  
ABHD4  
ABHD5  
ACP6  
ACSS3  
AGMO  
AGPAT5  
AGT  
AHR  
AHRR  
ALAS1  
ALB  
ALDH3B1  
ALDH3B2  
ALPI  
ANGPTL4  
ANKRD1  
APOA1  
APOA2  
APOA5  
ARF1  
ARF3  
ARNT  
ARNT2  
ARNTL  
ARV1  
BCHE  
BDH1  
BDH2  
BMX  
CARM1  
CAV1  
CCNC  
CDK19  
CDK8  
CEPT1  
CERS1  
CERS2  
CERS3  
CERS4  
CERS5  
CERS6  
CERT1  
CH25H  
CHD9  
CIDEA



CLOCK  
CPNE1  
CPNE3  
CPNE6  
CPNE7  
CREBBP  
CSNK1G2  
CSNK2A1  
CSNK2A2  
CSNK2B  
CUBN  
CYP27A1  
CYP46A1  
CYP51A1  
CYP7A1  
DDHD1  
DDHD2  
DGAT2L6  
DHCR7  
EBP  
ENPP6  
EP300  
ESRRA  
ETNPPL  
FA2H  
FABP12  
FABP3  
FABP4  
FABP5  
FABP6  
FABP7  
FABP9  
FAM120B  
FDFT1  
FDPS  
FHL2  
FIG4  
GDE1  
GDPD1  
GDPD3  
GDPD5  
GGPS1  
GK3P  
GLIPR1  
GPCPD1  
GPS2  
GRHL1  
HDAC3  
HELZ2  
HMGCLL1

HMGCR  
INPP4A  
INPP4B  
INPP5D  
INPP5E  
INPP5F  
INPP5J  
INPP5K  
INPPL1  
INSIG1  
INSIG2  
KPNB1  
LBR  
LIPE  
LIPH  
LIPI  
LPIN1  
LPIN2  
LPIN3  
LSS  
MBTPS1  
MBTPS2  
MED1  
MED10  
MED11  
MED12  
MED13  
MED13L  
MED14  
MED15  
MED16  
MED17  
MED18  
MED19  
MED20  
MED21  
MED22  
MED23  
MED24  
MED25  
MED26  
MED27  
MED28  
MED29  
MED30  
MED31  
MED4  
MED6  
MED7  
MED8

MED9  
MFSD2A  
MIGA1  
MIGA2  
MOGAT1  
MOGAT2  
MOGAT3  
MSMO1  
MTF1  
MTM1  
MTMR1  
MTMR10  
MTMR12  
MTMR14  
MTMR2  
MTMR3  
MTMR4  
MTMR6  
MTMR7  
MTMR8  
MTMR9  
MVD  
MVK  
NCOA1  
NCOA2  
NCOA3  
NCOA6  
NCOR1  
NCOR2  
NFYA  
NFYB  
NFYC  
NPAS2  
NR1D1  
NR1H2  
NR1H3  
NR1H4  
NRF1  
OCRL  
ORMDL1  
ORMDL2  
ORMDL3  
OSBP  
OSBPL10  
OSBPL5  
OSBPL8  
OXCT1  
OXCT2  
PDCD6-AHRR  
PEX11A

PI4K2A  
PI4K2B  
PI4KA  
PI4KB  
PIK3C2A  
PIK3C2B  
PIK3C2G  
PIK3C3  
PIK3CA  
PIK3CB  
PIK3CD  
PIK3CG  
PIK3R1  
PIK3R2  
PIK3R3  
PIK3R4  
PIK3R5  
PIK3R6  
PIKFYVE  
PIP4K2A  
PIP4K2B  
PIP4K2C  
PIP4P1  
PIP5K1A  
PIP5K1B  
PIP5K1C  
PITPNB  
PITPNM1  
PITPNM2  
PITPNM3  
PLA1A  
PLA2G4C  
PLA2G4D  
PLA2G4F  
PLA2R1  
PLAAT1  
PLAAT2  
PLAAT3  
PLAAT4  
PLAAT5  
PLB1  
PLBD1  
PLD3  
PLD4  
PLD6  
PLEKHA1  
PLEKHA2  
PLEKHA3  
PLEKHA4  
PLEKHA5

PLEKHA6  
PLEKHA8  
PLIN1  
PLIN2  
PLIN3  
PMVK  
PNPLA2  
PNPLA4  
PNPLA5  
PNPLA6  
PNPLA7  
PNPLA8  
PPARG  
PPARGC1A  
PPARGC1B  
PPM1L  
PPP1CA  
PPP1CB  
PPP1CC  
PRKACA  
PRKACB  
PRKACG  
PRKD1  
PRKD2  
PRKD3  
PTEN  
PTPMT1  
PTPN13  
RAB14  
RAB4A  
RAB5A  
RAN  
RGL1  
RORA  
RUFY1  
RXRB  
SACM1L  
SAMD8  
SAR1B  
SBF1  
SBF2  
SC5D  
SCAP  
SEC23A  
SEC24A  
SEC24B  
SEC24C  
SEC24D  
SELENOI  
SIN3A

SIN3B  
SLC27A1  
SLC44A1  
SLC44A2  
SLC44A3  
SLC44A4  
SLC44A5  
SMARCD3  
SP1  
SPNS2  
SPTLC3  
SPTSSA  
SPTSSB  
SQLE  
SREBF1  
SREBF2  
STARD10  
STARD7  
SULT2A1  
SYNJ1  
SYNJ2  
TBL1X  
TBL1XR1  
TGS1  
THRAP3  
TIAM2  
TM7SF2  
TMEM86B  
TNFAIP8  
TNFAIP8L1  
TNFAIP8L2  
TNFAIP8L3  
TNFRSF21  
TPTE  
TPTE2  
TRIB3  
TXNRD1  
UGT1A9  
VAC14  
VAPA  
VAPB  
ABCG1  
MIR1908  
MYLIP  
SOAT1  
SOAT2  
APOC2  
ABCA2  
APOC1  
GNB3

LDLR  
MIR30C1  
SCARB1  
APOE  
LDLRAP1  
APOB  
A2M  
APOA4  
APOC3  
APOC4  
BMP1  
MTTP  
P4HB  
ZDHC8  
AMN  
ANGPTL3  
ANGPTL8  
AP2A1  
AP2A2  
AP2B1  
AP2M1  
AP2S1  
APOBR  
APOF  
CES3  
CETP  
CLTA  
CLTC  
CREB3L3  
FGF21  
FURIN  
GPIHBP1  
HDLBP  
LIPA  
LMF1  
LMF2  
LPA  
LSR  
NCEH1  
NPC1  
NPC2  
PCSK5  
PCSK6  
PCSK9  
PLTP  
VLDLR

gdb).



**Supplementary Table 6** Predicted upstream miRNAs of SELP, CD93, VAV1, and IL2RG.

| mRNA | miRNA           | Miwalk | TargetScan | miRDB | StarBase |
|------|-----------------|--------|------------|-------|----------|
| SELP | hsa-miR-510-5p  | +      | +          | +     |          |
| SELP | hsa-miR-583     | +      | +          | +     |          |
| SELP | hsa-miR-608     | +      | +          | +     |          |
| SELP | hsa-miR-659-3p  | +      | +          | +     |          |
| SELP | hsa-miR-671-5p  | +      | +          | +     |          |
| SELP | hsa-miR-2110    | +      | +          | +     |          |
| SELP | hsa-miR-3126-5p | +      | +          | +     |          |
| SELP | hsa-miR-3158-5p | +      | +          | +     |          |
| SELP | hsa-miR-3179    | +      | +          | +     |          |
| SELP | hsa-miR-3202    | +      | +          | +     |          |
| SELP | hsa-miR-3663-5p | +      | +          | +     |          |
| SELP | hsa-miR-4456    | +      | +          | +     |          |
| SELP | hsa-miR-4465    | +      | +          | +     |          |
| SELP | hsa-miR-4476    | +      | +          | +     |          |
| SELP | hsa-miR-4651    | +      | +          | +     |          |
| SELP | hsa-miR-6772-3p | +      | +          | +     |          |
| SELP | hsa-miR-6815-3p | +      | +          | +     |          |
| SELP | hsa-miR-6875-5p | +      | +          | +     |          |
| SELP | hsa-miR-6875-3p | +      | +          | +     |          |
| SELP | hsa-miR-6876-5p | +      | +          | +     |          |
| SELP | hsa-miR-7152-3p | +      | +          | +     |          |
| SELP | hsa-miR-570-5p  | +      | +          | +     |          |
| SELP | hsa-miR-3664-3p | +      | +          | +     |          |
| SELP | hsa-miR-548ai   |        | +          | +     |          |
| CD93 | hsa-miR-192-5p  | +      | +          | +     | +        |
| CD93 | hsa-miR-204-5p  | +      | +          | +     | +        |
| CD93 | hsa-miR-211-5p  | +      | +          | +     | +        |
| CD93 | hsa-miR-143-3p  | +      | +          | +     | +        |
| CD93 | hsa-miR-330-3p  | +      | +          | +     | +        |
| CD93 | hsa-miR-520a-5p | +      | +          | +     | +        |
| CD93 | hsa-miR-525-5p  | +      | +          | +     | +        |
| CD93 | hsa-miR-33b-5p  | +      | +          | +     | +        |
| CD93 | hsa-miR-1301-3p | +      | +          | +     | +        |
| CD93 | hsa-miR-3605-5p | +      | +          | +     | +        |
| CD93 | hsa-miR-3679-5p | +      | +          | +     | +        |
| CD93 | hsa-miR-3681-3p | +      | +          | +     | +        |
| CD93 | hsa-miR-5047    | +      | +          | +     | +        |
| VAV1 | hsa-miR-24-3p   | +      | +          | +     |          |
| VAV1 | hsa-miR-711     | +      | +          | +     |          |
| VAV1 | hsa-miR-3125    | +      | +          | +     |          |
| VAV1 | hsa-miR-4793-5p | +      | +          | +     |          |
| VAV1 | hsa-miR-6734-5p | +      | +          | +     |          |

| <b>mRNA</b> | <b>miRNA</b>    | <b>Miwalk</b> | <b>TargetScan</b> | <b>miRDB</b> | <b>StarBase</b> |
|-------------|-----------------|---------------|-------------------|--------------|-----------------|
| VAV1        | hsa-miR-6817-3p | +             | +                 | +            |                 |
| VAV1        | hsa-miR-6859-5p | +             | +                 | +            |                 |
| VAV1        | hsa-miR-609     | +             | +                 | +            |                 |
| VAV1        | hsa-miR-3916    | +             | +                 | +            |                 |
| IL2RG       | hsa-miR-513c-5p | +             | +                 | +            | +               |
| IL2RG       | hsa-miR-1321    | +             | +                 | +            | +               |
| IL2RG       | hsa-miR-514b-5p | +             | +                 | +            | +               |
| IL2RG       | hsa-miR-4640-5p | +             | +                 | +            | +               |
| IL2RG       | hsa-miR-4726-5p | +             | +                 | +            | +               |
| IL2RG       | hsa-miR-4739    | +             | +                 | +            | +               |
| IL2RG       | hsa-miR-4756-5p | +             | +                 | +            | +               |

**Supplementary Table 7** Predicted upstream lincRNAs of miRNAs.

| mRNA  | miRNA           | lincRNA                                          |
|-------|-----------------|--------------------------------------------------|
| SELP  | hsa-miR-510-5p  | LINC00662                                        |
| SELP  | hsa-miR-671-5p  | XIST                                             |
| SELP  | hsa-miR-3126-5p | LINC00665, MALAT1                                |
| SELP  | hsa-miR-3179    | NEAT1, XIST, LINC00665, MIR4458HG                |
| SELP  | hsa-miR-4465    | LINC00665, LINC01111, LINC00847                  |
| SELP  | hsa-miR-6875-5p | LINC00665, LINC00858, MALAT1                     |
| SELP  | hsa-miR-1297    | MALAT1, WASIR2, MIR181A1HG, LINC00665, LINC01111 |
| VAV1  | hsa-miR-24-3p   | DIO3OS, LINC00662                                |
| IL2RG | hsa-miR-1321    | LINC00885, LINC01503, LINC00638                  |
| IL2RG | hsa-miR-4640-5p | LINC00662, XIST                                  |
| IL2RG | hsa-miR-4726-5p | LINC00662, XIST, LINC00943                       |
| IL2RG | hsa-miR-4739    | NEAT1, LINC00511, LINC00638                      |
| IL2RG | hsa-miR-4756-5p | LINC00910, LINC00638, LINC01503                  |
| CD93  | hsa-miR-192-5p  | LINC01089, SMC2-AS1                              |
| CD93  | hsa-miR-204-5p  | HCG11, NEAT1                                     |
| CD93  | hsa-miR-211-5p  | NEAT1, HCG11                                     |
| CD93  | hsa-miR-143-3p  | LINC00662, TSIX, UCA1, PCAT19                    |
| CD93  | hsa-miR-330-3p  | NEAT1, XIST, LINC00662, LINC01355                |
| CD93  | hsa-miR-448     | XIST, LINC00667, LINC01003, PAXIP1-AS1           |
| CD93  | hsa-miR-1301-3p | MIR99AHG                                         |
| CD93  | hsa-miR-3679-5p | NEAT1                                            |
| CD93  | hsa-miR-3681-3p | NEAT1, C22orf34, GLIDR                           |
| CD93  | hsa-miR-5047    | MIR99AHG                                         |
